# Supplementary material for: Targeted inhibition of the PI3K/AKT/mTOR pathway by (+)-anthrabenzoxocinone induces cell cycle arrest, apoptosis, and autophagy in non-small cell lung cancer
Source: PubMed Central journal article supplement (PMC11036658; doi:10.1186/s11658-024-00578-6), 2024-04-23
Supplement: 11658_2024_578_MOESM1_ESM.pdf [file 11658_2024_578_MOESM1_ESM.pdf]

## **Additional file 1**

### **Targeted Inhibition of the PI3K/AKT/mTOR Pathway by (+)-Anthrabenzoxocinone Induces Cell Cycle Arrest, Apoptosis, and Autophagy in Non-Small Cell Lung Cancer**

Xiao-Qian Li <sup>a</sup>, Xiao-Ju Cheng <sup>a</sup>, Jie Wu <sup>a</sup>, Kai-Feng Wu <sup>a\*</sup>, Tie Liu <sup>a,b\*</sup>

*<sup>a</sup>The Third Affiliated Hospital of Zunyi Medical University (The First People's Hospital of Zunyi), Scientific Research Center, Guizhou 563002, People's Republic of China*

*<sup>b</sup>Yunnan Characteristic Plant Extraction Laboratory, Key Laboratory of Medicinal Chemistry for Natural Resource, Key Laboratory of Medicinal Chemistry for Natural Resource, Ministry of Education and Yunnan Province, School of Chemical Science and Technology, Yunnan University, Kunming, 650091, People's Republic of China*

---

**\*Corresponding Author:**

***Tie Liu and Kai-Feng Wu***

Tel: +86-851-23110859

Email: [liutiehes@outlook.com](mailto:liutiehes@outlook.com) (Tie Liu), [kphoonwu@126.com](mailto:kphoonwu@126.com) (Kai-Feng Wu)

## Content of Supplementary Data

|                                                                                                                                       |           |
|---------------------------------------------------------------------------------------------------------------------------------------|-----------|
| <b>Fig. S1.</b> Antitumor activity screening results of (+)-ABX.                                                                      | <b>3</b>  |
| <b>Table S1.</b> The primer sequences in qRT-PCR assay                                                                                | <b>4</b>  |
| <b>Fig. S2.</b> Effects of different concentrations of (+)-ABX on the colony formation of three NSCLC cell lines                      | <b>5</b>  |
| <b>Fig. S3.</b> Effects of different concentrations of (+)-ABX on migration of three NSCLC cell lines                                 | <b>6</b>  |
| <b>Fig. S4.</b> Effects of different concentrations of (+)-ABX on invasion of three NSCLC cell lines                                  | <b>7</b>  |
| <b>Fig. S5.</b> Effects of different concentrations of (+)-ABX on the cell cycle distribution of three NSCLC cell lines               | <b>8</b>  |
| <b>Fig. S6.</b> Flow cytometry analysis of apoptosis rates in three NSCLC cell lines treated with different concentrations of (+)-ABX | <b>9</b>  |
| <b>Fig. S7.</b> Transcriptomic analysis.                                                                                              | <b>10</b> |
| <b>Fig. S8.</b> Differences in the binding sites between (+)-ABX and LY294002 with the PI3K protein.                                  | <b>11</b> |
| <b>Table S2.</b> The images of immunohistochemistry staining in three repetitions                                                     | <b>12</b> |
| <b>Table S3.</b> The images of the original western blots in three repetitions                                                        | <b>17</b> |
| The original images of <b>Fig. 7A</b> and <b>7B</b> .                                                                                 | <b>59</b> |

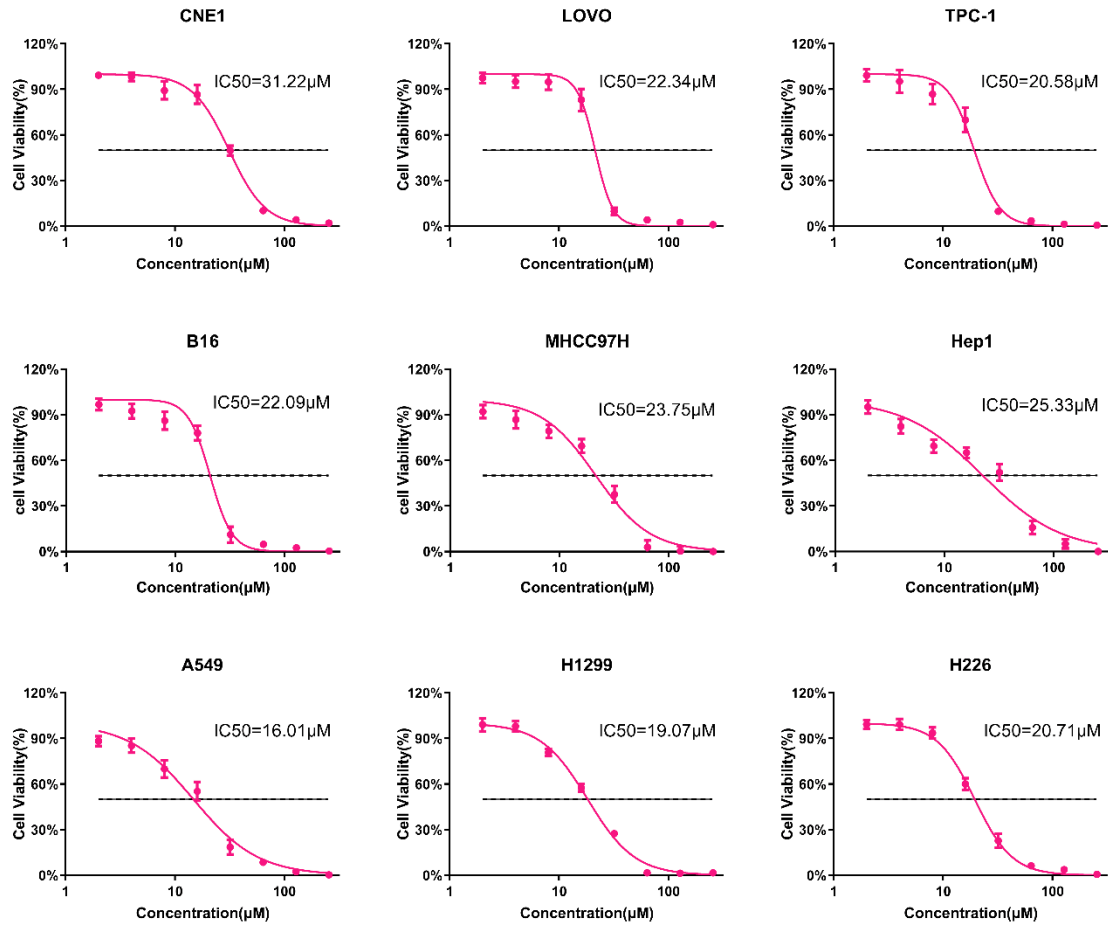

**Fig. S1.** Antitumor activity screening results of (+)-ABX. The screening range includes nasopharyngeal carcinoma cells (CNE1), colorectal cancer cells (LOVO), thyroid cancer cells (TPC-1), melanoma cells (B16), liver cancer cells (MHCC97H, Hep1), and lung cancer cells (A549, H1299, and H226). The IC<sub>50</sub> values were determined using the CCK-8 method.

**Table S1.** The primer sequences in qRT-PCR assay.

| Gene           | Primer name       | Sequence (5' to 3')    |
|----------------|-------------------|------------------------|
| Bcl2           | Bcl2-F            | GGAGGATTATGGCCTTCTTTG  |
|                | Bcl2-R            | GCAGGCATGTTGACTTCACTTG |
| BAX            | BAX -F            | TTTGCTTCAGGGTTTCATCC   |
|                | BAX -R            | GCCACAAAGATGGTCACGGT   |
| Caspase-9      | Caspase-9-F       | GTGGTGGGGAGCAGAAAGAC   |
|                | Caspase-9-R       | TGCAAGATAAGGCAGGGTGAG  |
| $\beta$ -actin | $\beta$ -actin -F | AGACCTTCAACACCCAG      |
|                | $\beta$ -actin -R | CACGATTTCCCTCTCAGC     |



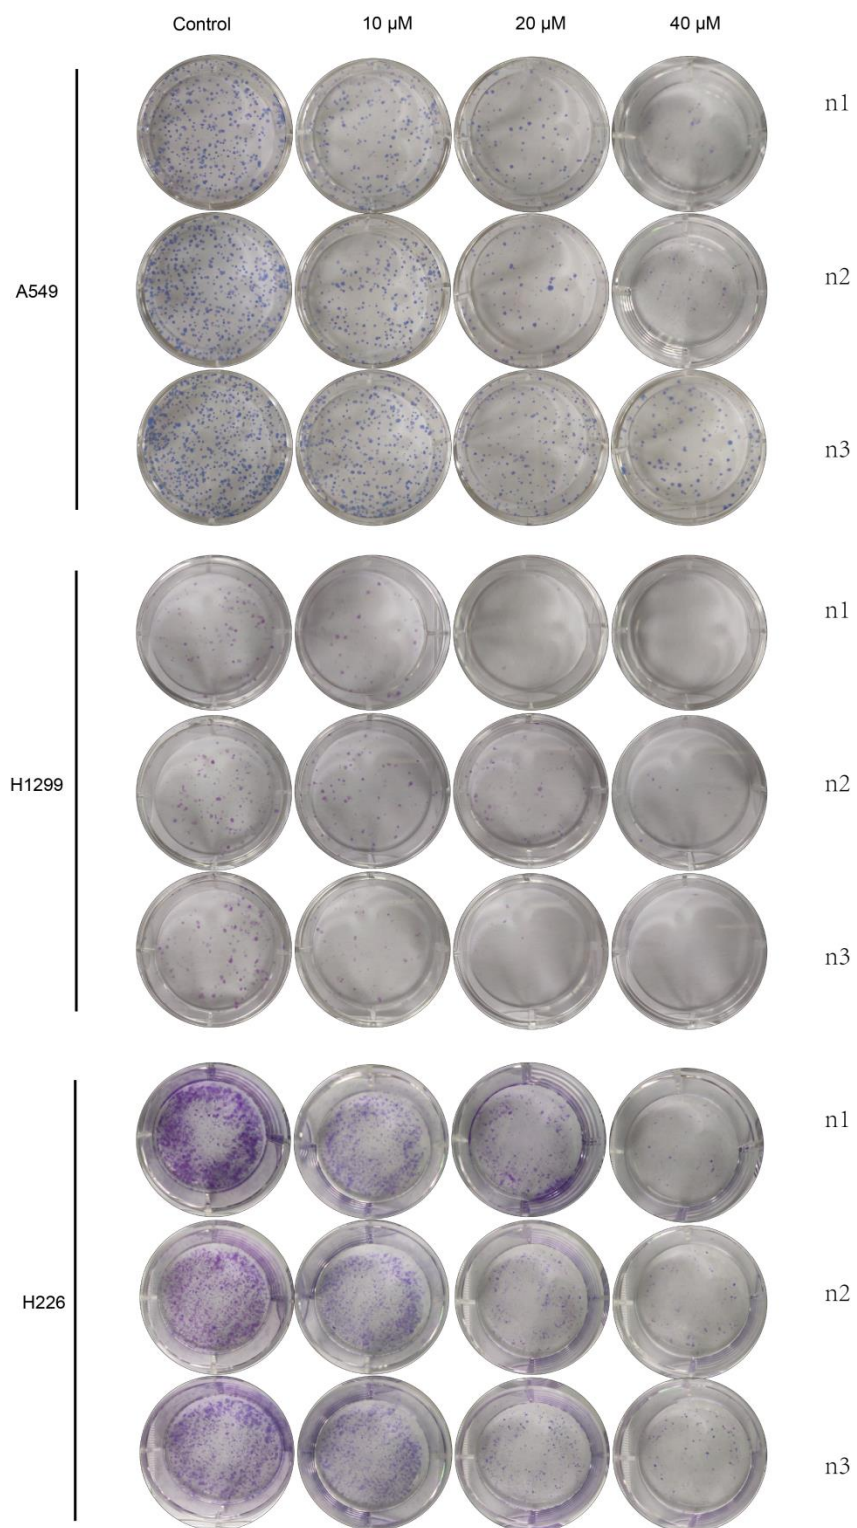

**Fig. S2.** Effects of different concentrations of (+)-ABX on the colony formation of three NSCLC cell lines.

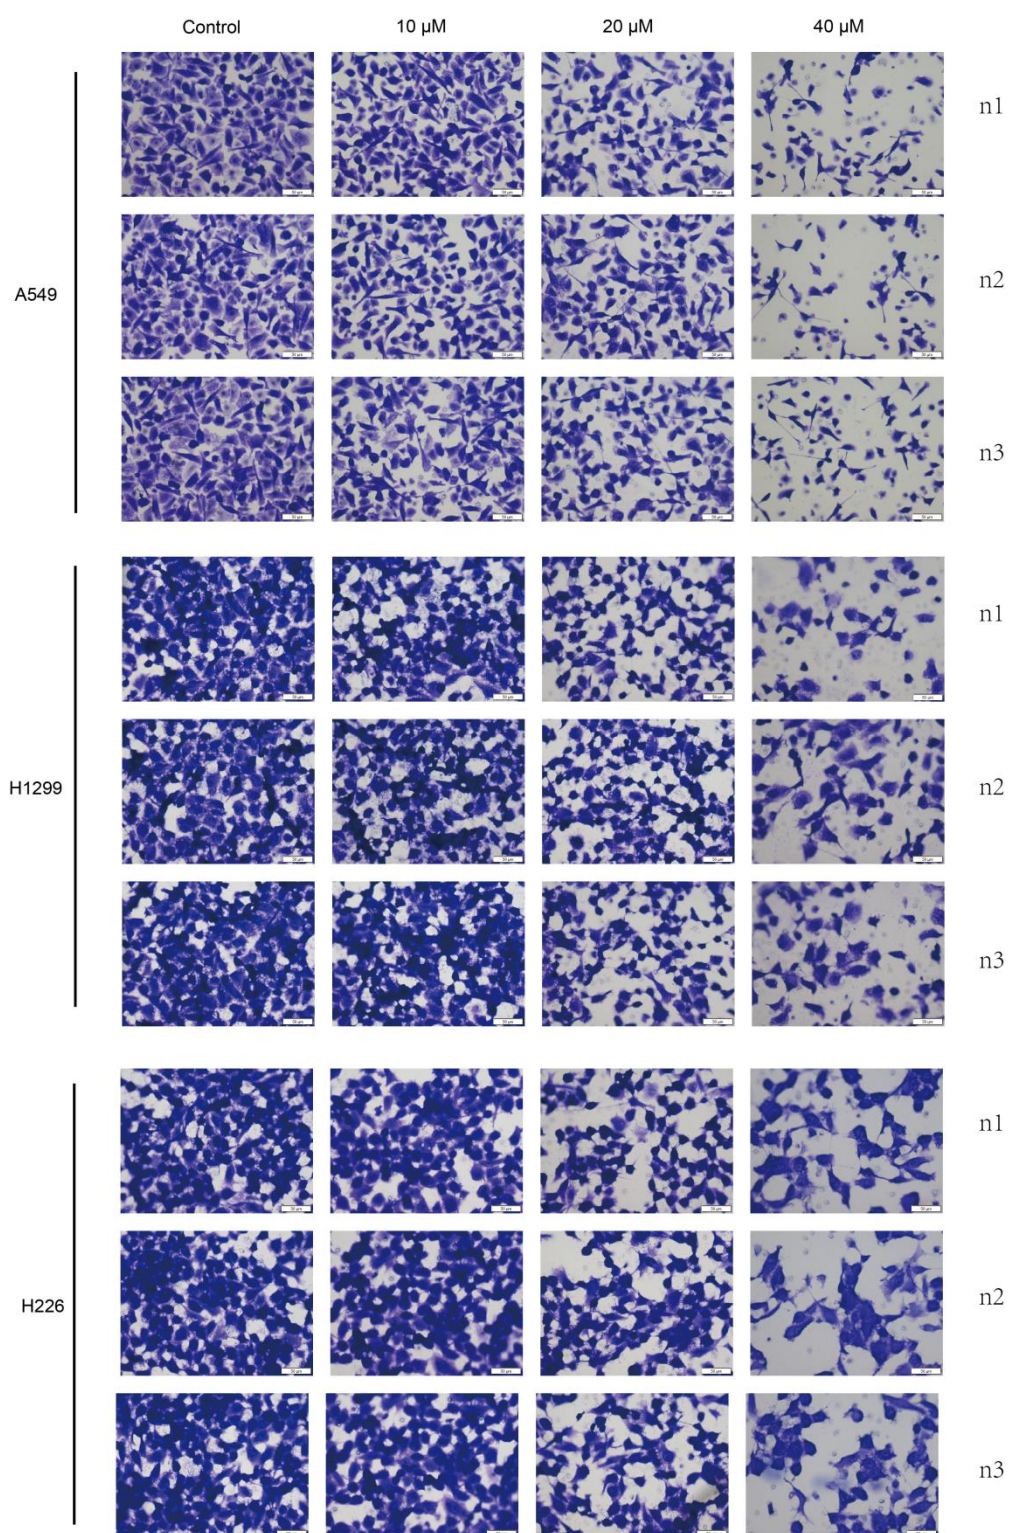

**Fig. S3.** Effects of different concentrations of (+)-ABX on migration of three NSCLC cell lines (magnification  $\times 200$ , scale bar = 50  $\mu$ m).



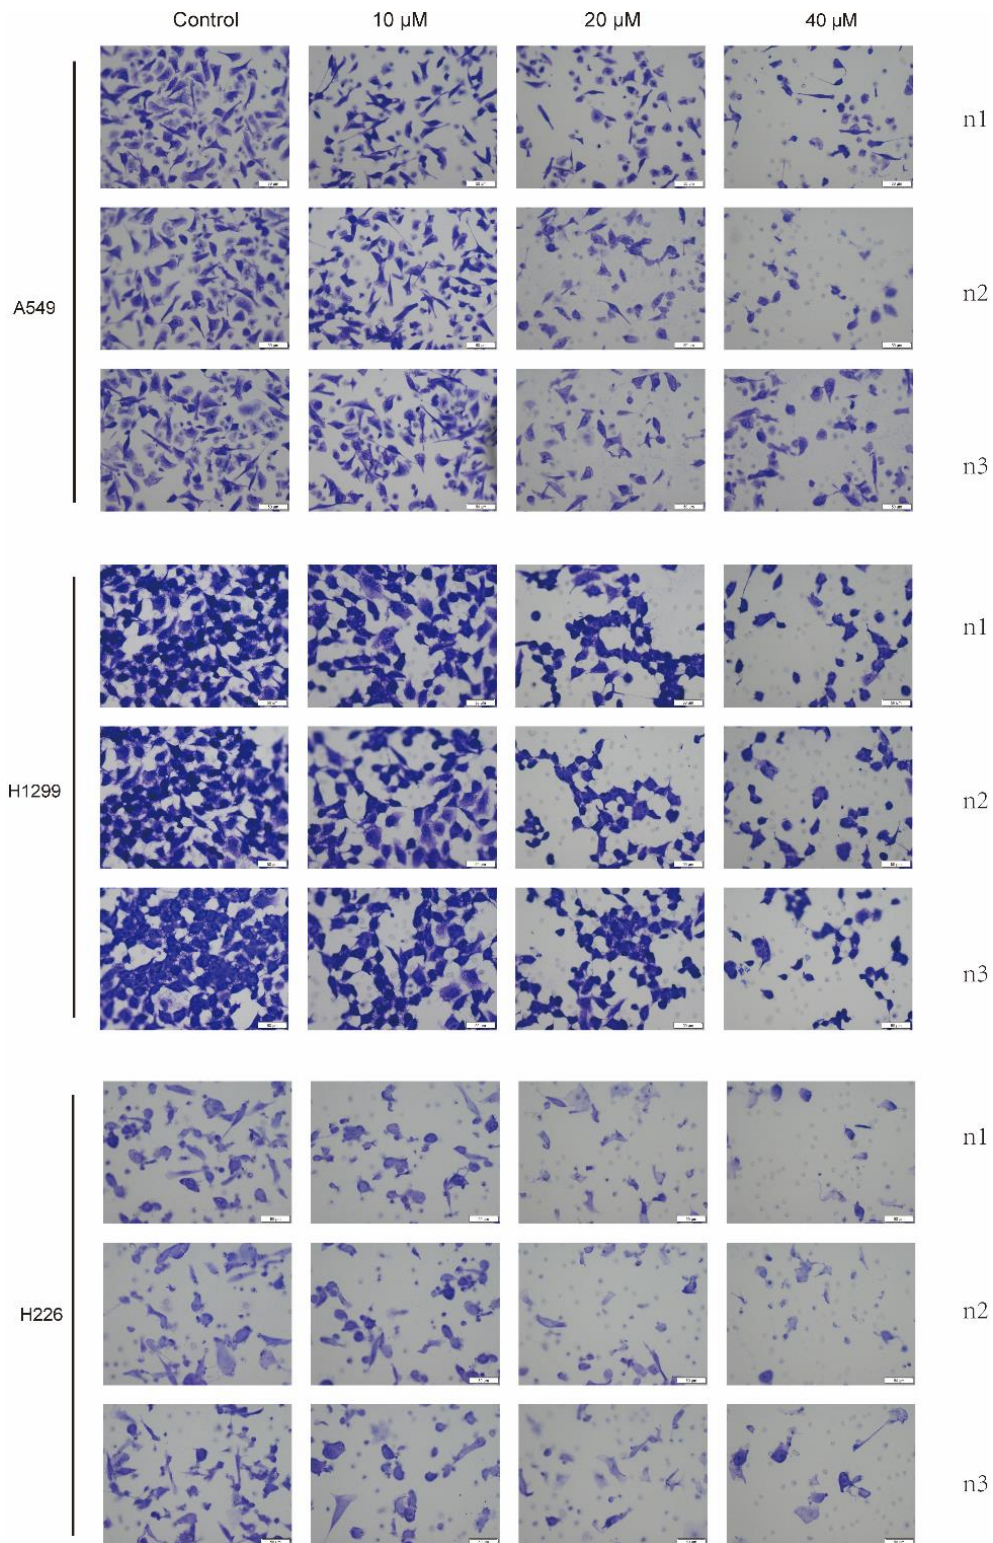

**Fig. S4.** Effects of different concentrations of (+)-ABX on invasion of three NSCLC cell lines (magnification  $\times 200$ , scale bar = 50  $\mu\text{m}$ ).

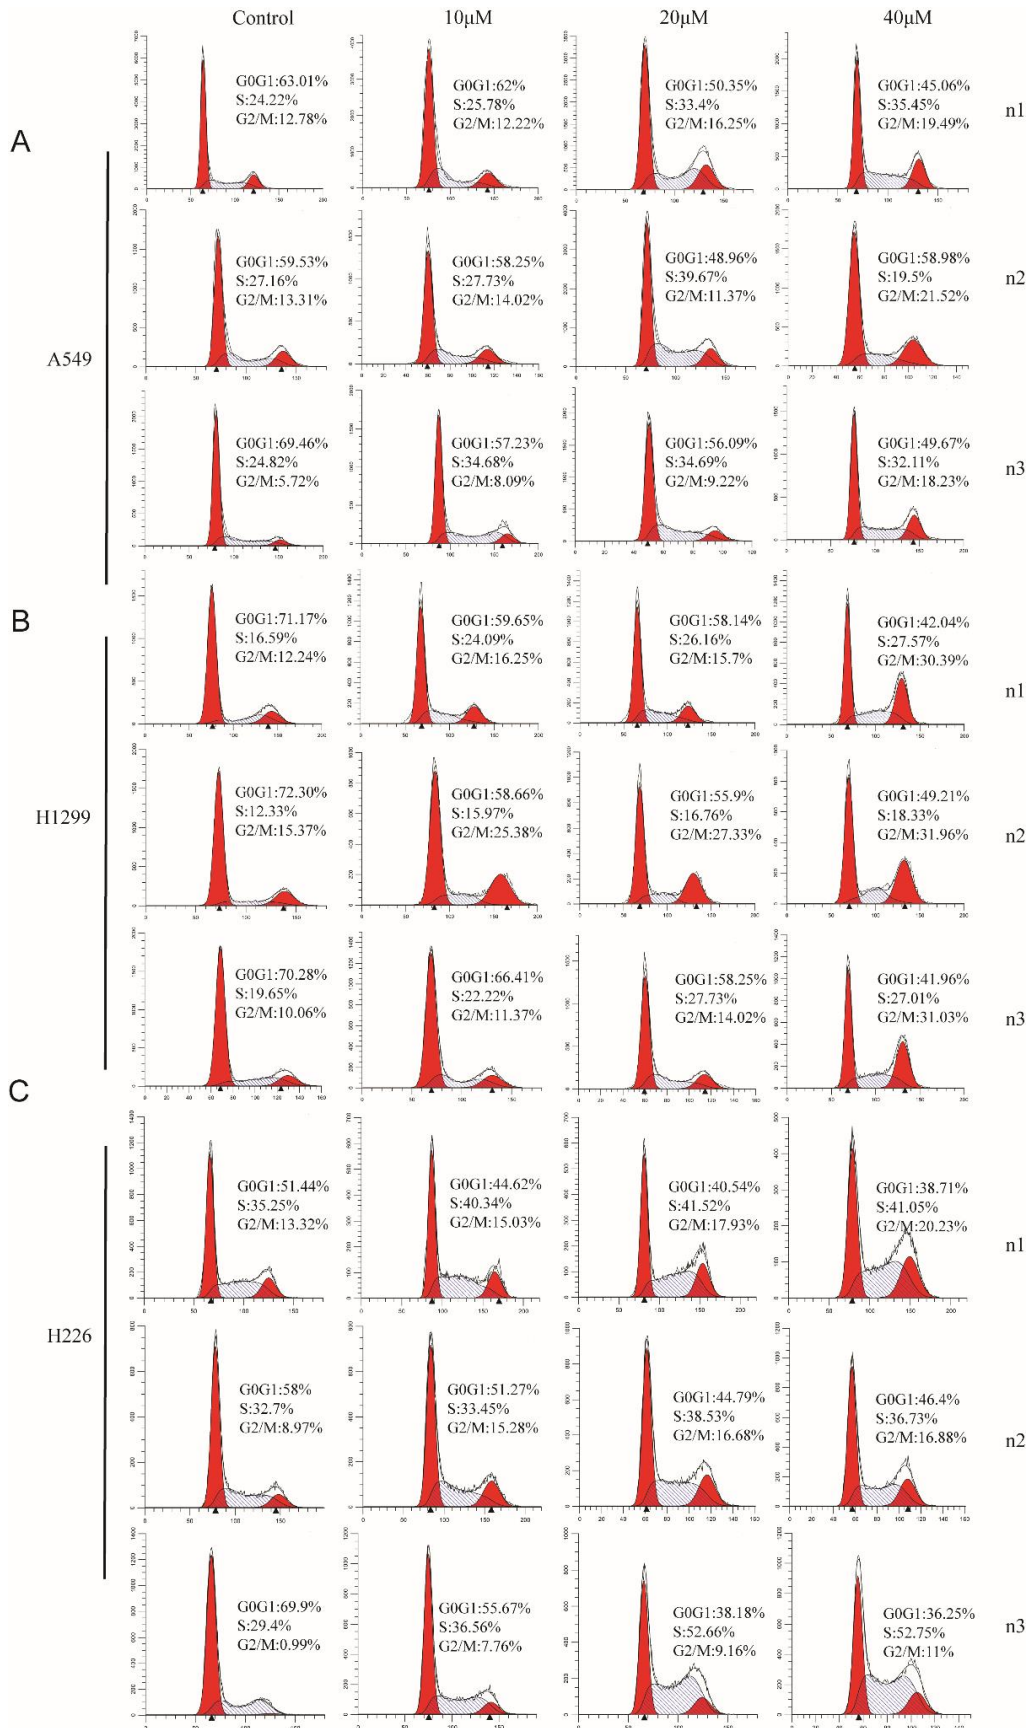

**Fig. S5.** Effects of different concentrations of (+)-ABX on the cell cycle distribution of three NSCLC cell lines.

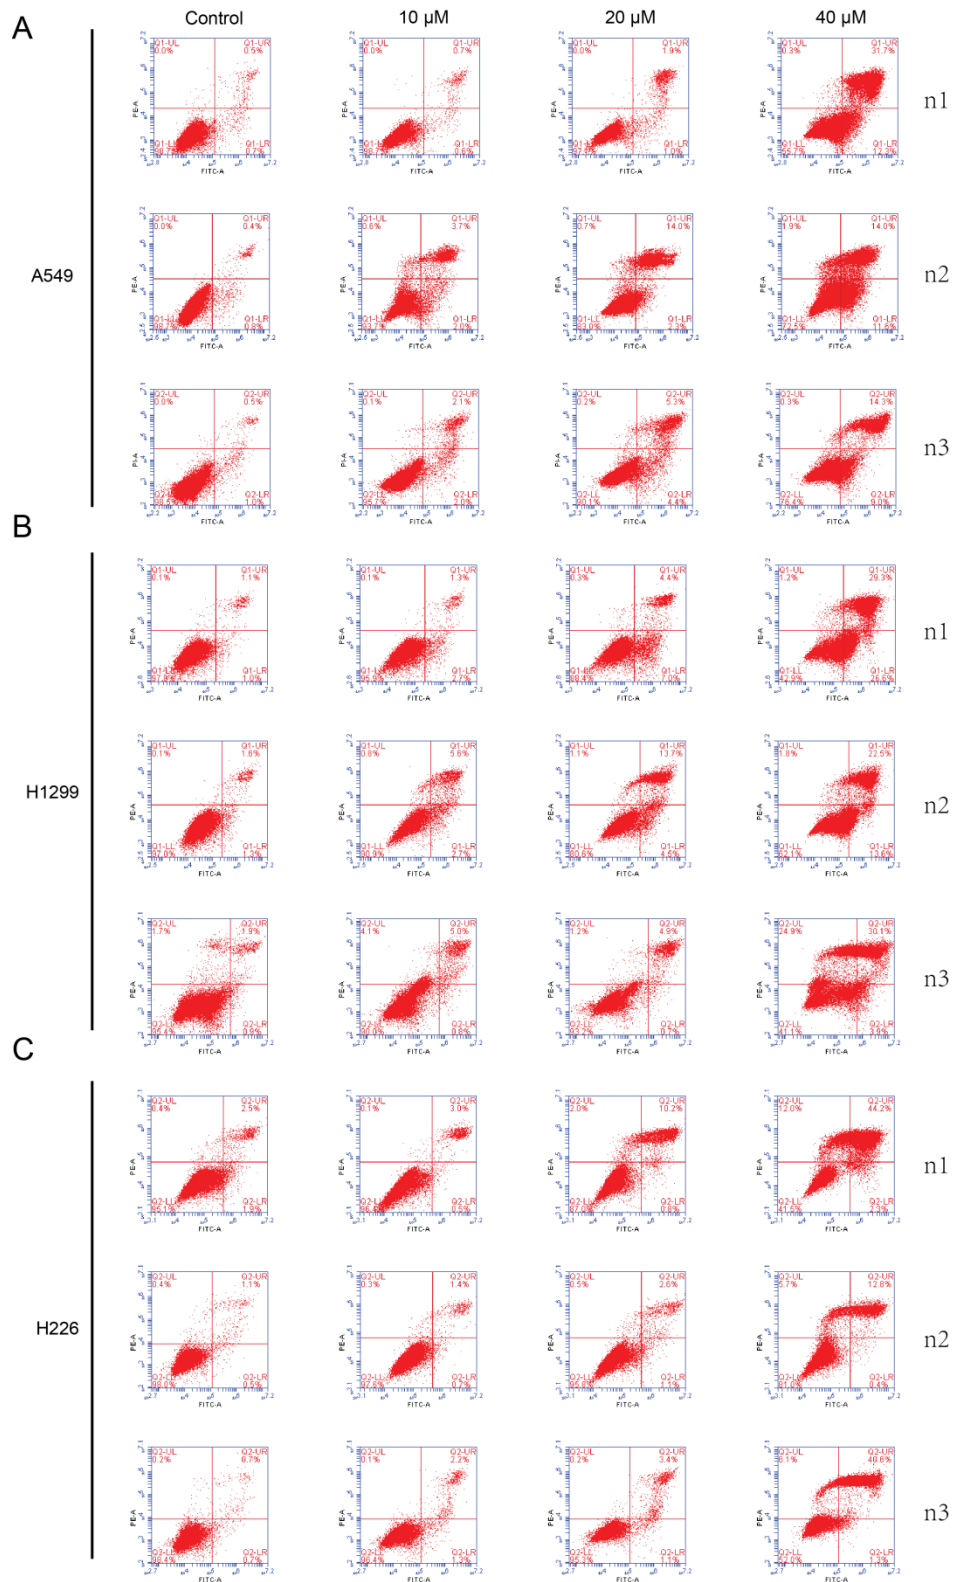

**Fig. S6.** Flow cytometry analysis of apoptosis rates in three NSCLC cell lines treated with different concentrations of (+)-ABX.

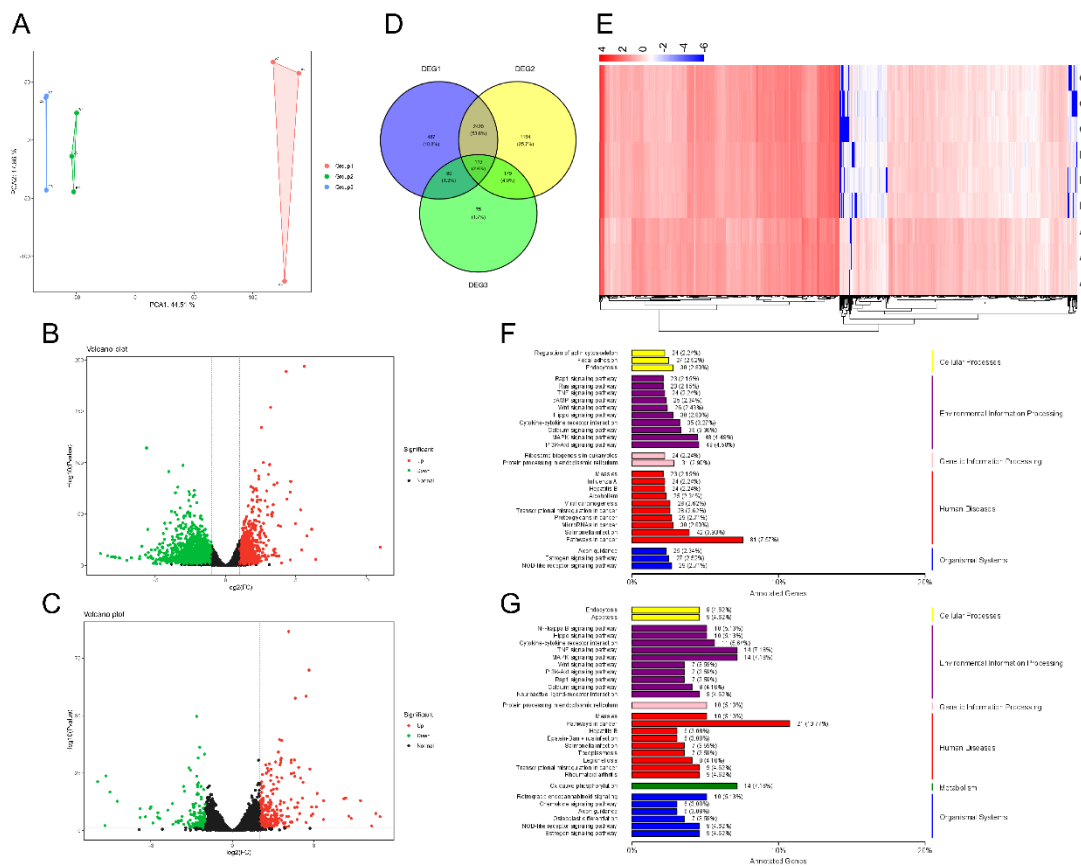

**Fig. S7.** Transcriptomic analysis. Group A: untreated group ; Group B: 20  $\mu\text{M}$  (+)-ABX treated group ; Group C: 40  $\mu\text{M}$  (+)-ABX treated group. (A) Principal Component Analysis (PCA). (B) Volcano plot of differentially expressed genes (A vs B). (C) Volcano plot of differentially expressed genes (B vs C). (D) Venn diagram of differentially expressed genes. (E) Hierarchical clustering heatmap of differentially expressed genes in three groups. (F) Kyoto Encyclopedia of Genes and Genomes (KEGG) pathway analysis (A vs B). (G) Kyoto Encyclopedia of Genes and Genomes (KEGG) pathway analysis (B vs C).



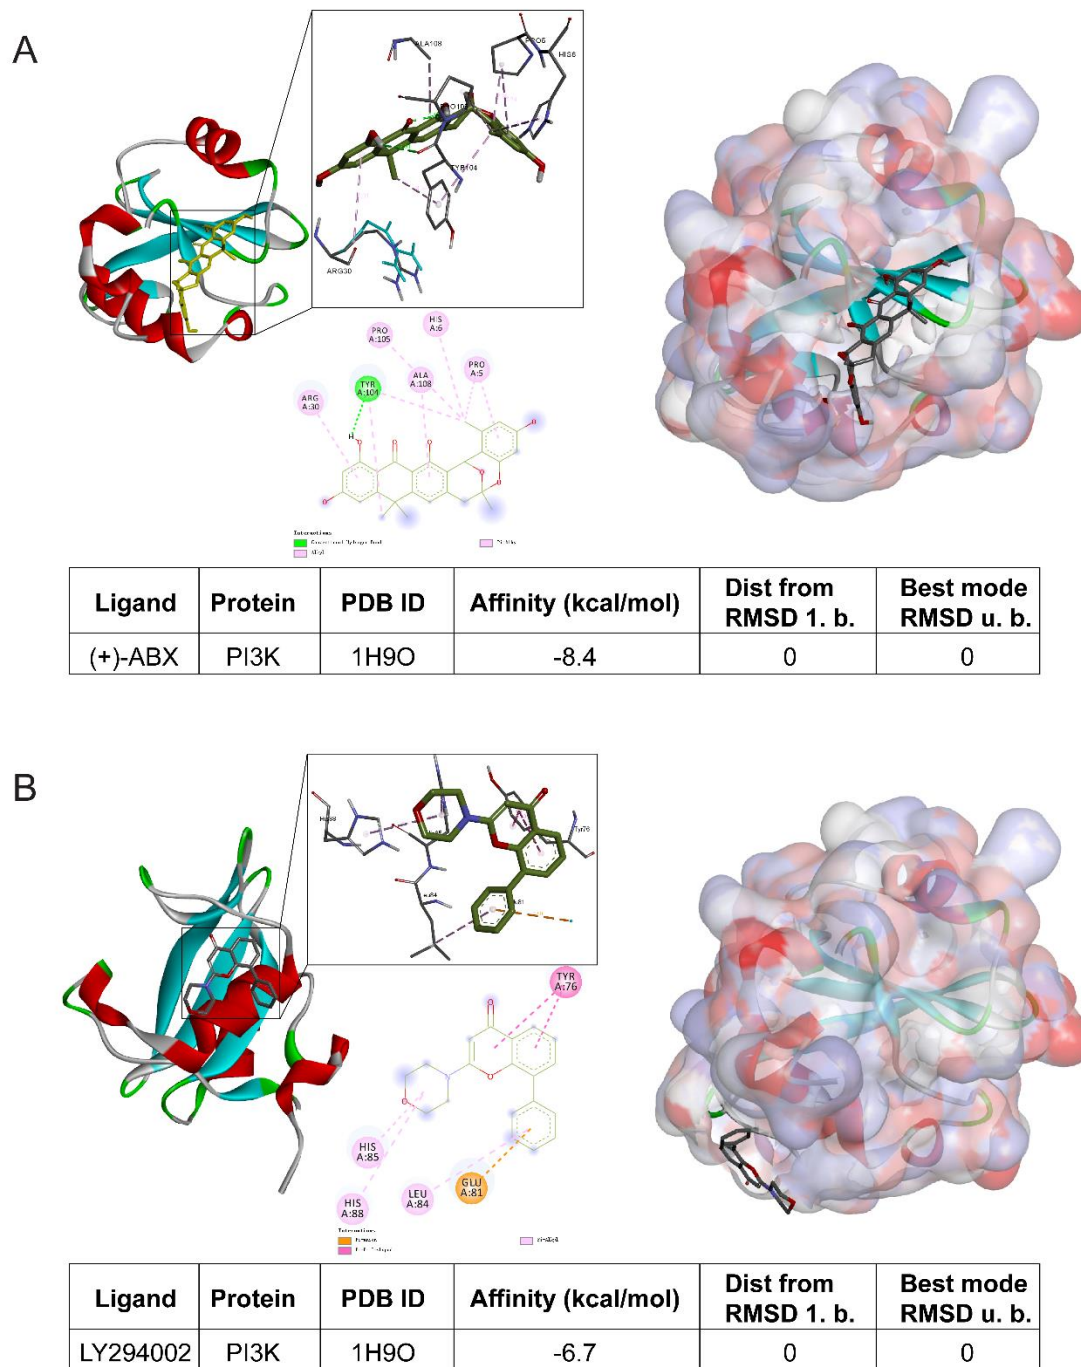

**Fig. S8.** Differences in the binding sites between (+)-ABX and LY294002 with the PI3K protein. (A) Docking results of (+)-ABX with PI3K. (B) Docking results of LY294002 with PI3K.

**Table S2.** The images of immunohistochemistry staining in three repetitions

| Beclin1                    | n1                                                                                  | n2                                                                                   | n3                                                                                    |
|----------------------------|-------------------------------------------------------------------------------------|--------------------------------------------------------------------------------------|---------------------------------------------------------------------------------------|
| Control<br>×100<br>(100μm) | 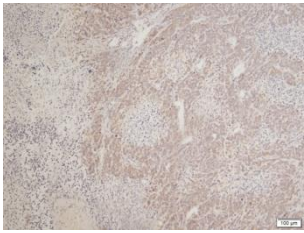   |    |    |
| Control<br>×400<br>(20μm)  |    |    |    |
| Treated<br>×100<br>(100μm) |   |   |   |
| Treated<br>×400<br>(20μm)  |  |  |  |
| AKT                        | n1                                                                                  | n2                                                                                   | n3                                                                                    |
| Control<br>×100<br>(100μm) |  |  |  |
| Control<br>×400<br>(20μm)  |  |  |  |



|                            |                                                                                     |                                                                                      |                                                                                       |
|----------------------------|-------------------------------------------------------------------------------------|--------------------------------------------------------------------------------------|---------------------------------------------------------------------------------------|
| Treated<br>×100<br>(100μm) | 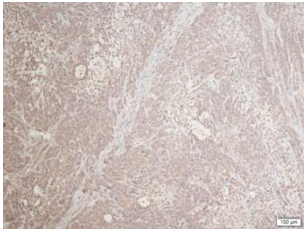   |    |    |
| Treated<br>×400<br>(20μm)  |    |    |    |
| BAX                        | n1                                                                                  | n2                                                                                   | n3                                                                                    |
| Control<br>×100<br>(100μm) |    |    |    |
| Control<br>×400<br>(20μm)  |   |   |   |
| Treated<br>×100<br>(100μm) |  |  |  |
| Treated<br>×400<br>(20μm)  |  |  |  |
| Caspase 3                  | n1                                                                                  | n2                                                                                   | n3                                                                                    |
| Control<br>×100<br>(100μm) |  |  |  |



|                            |                                                                                     |                                                                                      |                                                                                       |
|----------------------------|-------------------------------------------------------------------------------------|--------------------------------------------------------------------------------------|---------------------------------------------------------------------------------------|
| Control<br>×400<br>(20μm)  | 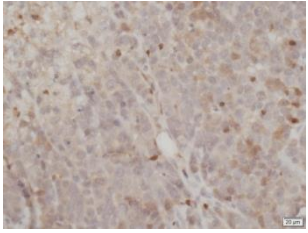   |    |    |
| Treated<br>×100<br>(100μm) |    |    |    |
| Treated<br>×400<br>(20μm)  |    |    |    |
| Caspase 9                  | n1                                                                                  | n2                                                                                   | n3                                                                                    |
| Control<br>×100<br>(100μm) |   |   |   |
| Control<br>×400<br>(20μm)  |  |  |  |
| Treated<br>×100<br>(100μm) |  |  |  |
| Treated<br>×400<br>(20μm)  |  |  |  |
| Ki67                       | n1                                                                                  | n2                                                                                   | n3                                                                                    |



|                            |                                                                                     |                                                                                      |                                                                                       |
|----------------------------|-------------------------------------------------------------------------------------|--------------------------------------------------------------------------------------|---------------------------------------------------------------------------------------|
| Control<br>×100<br>(100μm) | 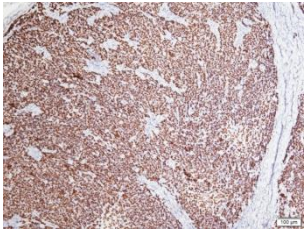   |    |    |
| Control<br>×400<br>(20μm)  |    |    |    |
| Treated<br>×100<br>(100μm) |    |    |    |
| Treated<br>×400<br>(20μm)  |   |   |   |
| LC3A                       | n1                                                                                  | n2                                                                                   | n3                                                                                    |
| Control<br>×100<br>(100μm) |  |  |  |
| Control<br>×400<br>(20μm)  |  |  |  |
| Treated<br>×100<br>(100μm) |  |  |  |

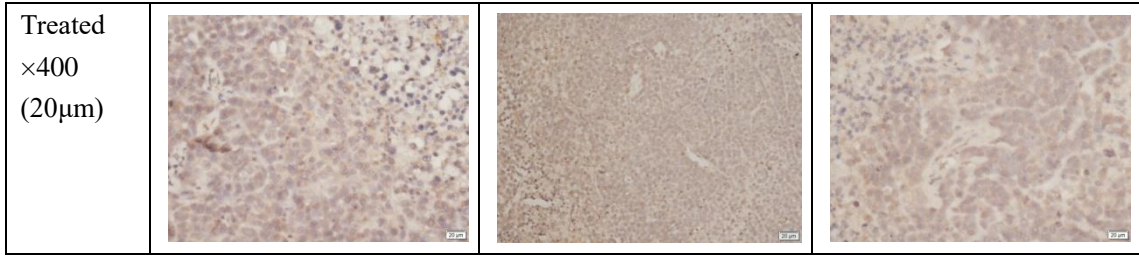

**Table S3.** The images of the original western blots in three repetitions

| Figure 2D      |                                                                                     |                                                                                     |                                                                                       |
|----------------|-------------------------------------------------------------------------------------|-------------------------------------------------------------------------------------|---------------------------------------------------------------------------------------|
| Proteins       | n1                                                                                  | n 2                                                                                 | n 3                                                                                   |
| CDK1           |    |    |    |
| Cyclin B1      |    |    |    |
| P21            |  |  |  |
| $\beta$ -actin |  |  |  |

Figure 2E

|           |                                                                                     |                                                                                      |                                                                                       |
|-----------|-------------------------------------------------------------------------------------|--------------------------------------------------------------------------------------|---------------------------------------------------------------------------------------|
| CDK1      |    |    |    |
| Cyclin B1 |    |    |    |
| P21       |  |  |  |
| β-actin   |  |  |  |

Figure 2F

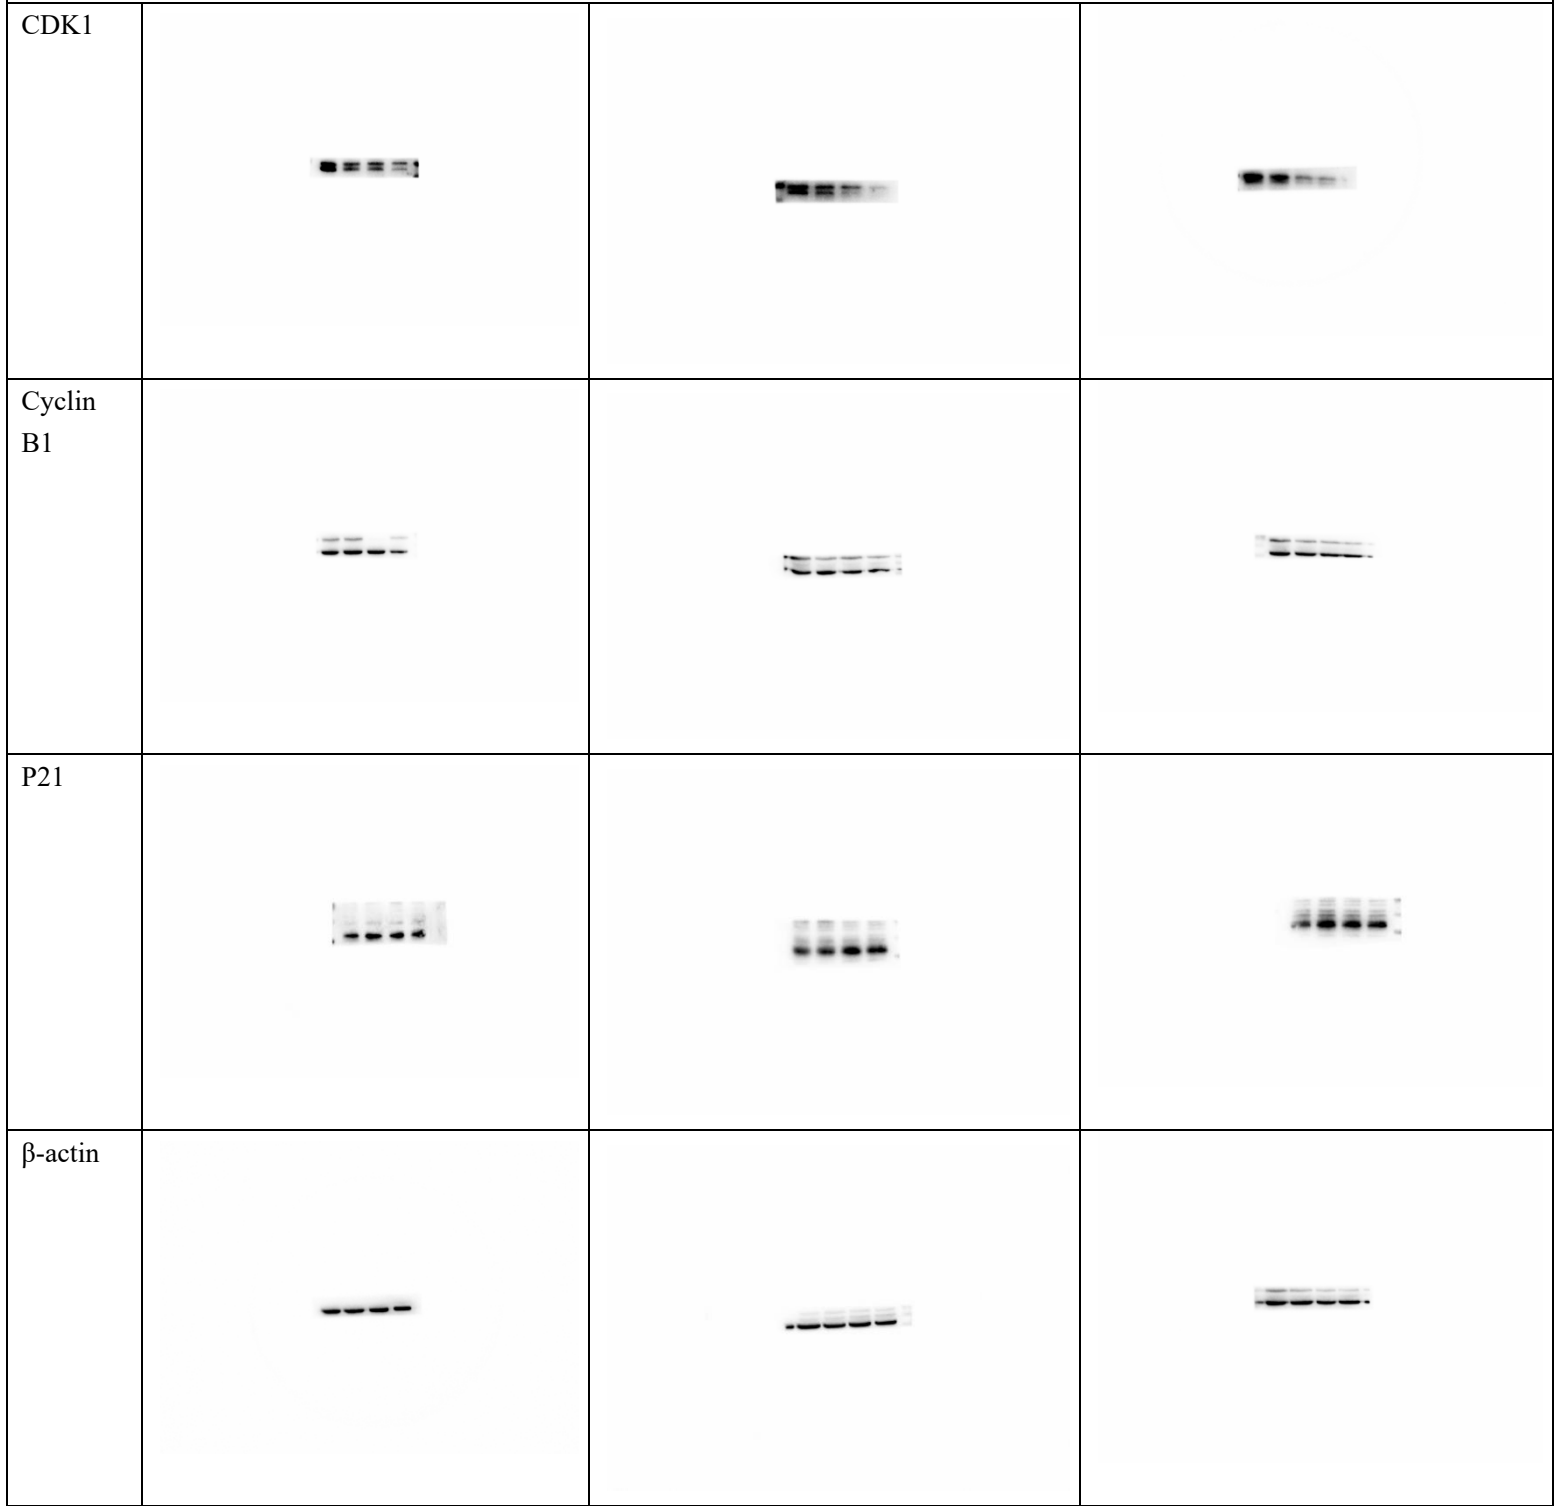

Figure 3E (A549)

|              |                                                                                     |                                                                                      |                                                                                       |
|--------------|-------------------------------------------------------------------------------------|--------------------------------------------------------------------------------------|---------------------------------------------------------------------------------------|
| Bcl2         | 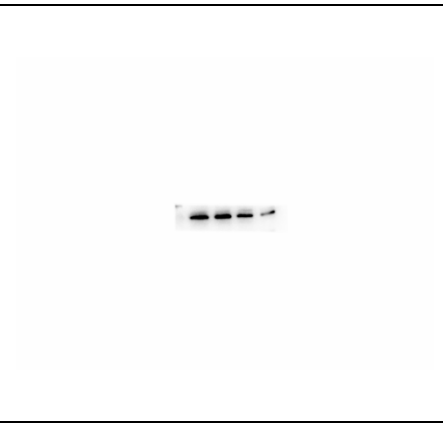   |    |    |
| Bax          |   |   |   |
| Cle-caspase3 |  |  |  |
| Cle-caspase9 |  |  |  |



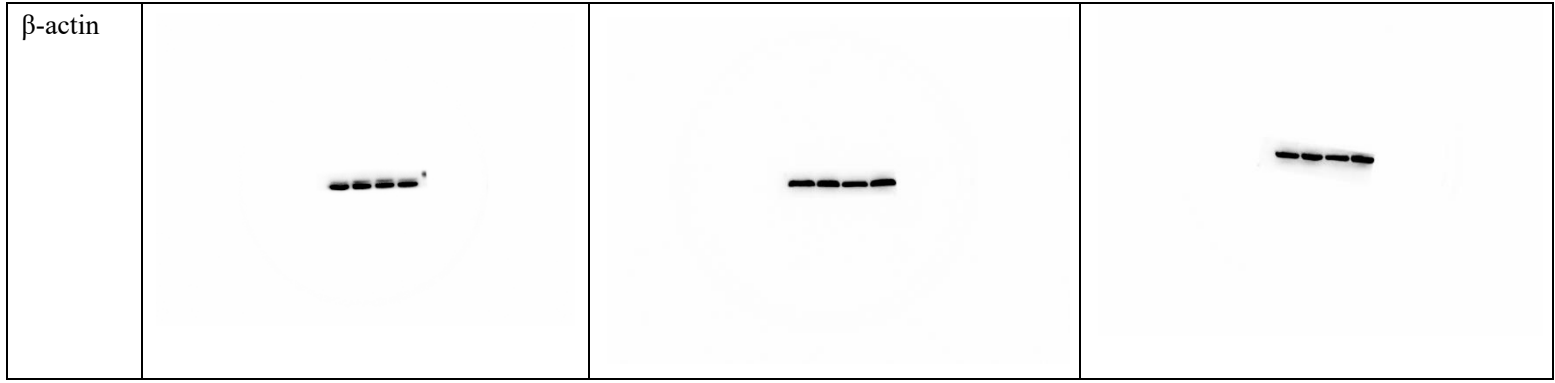

Figure 3E (H1299)

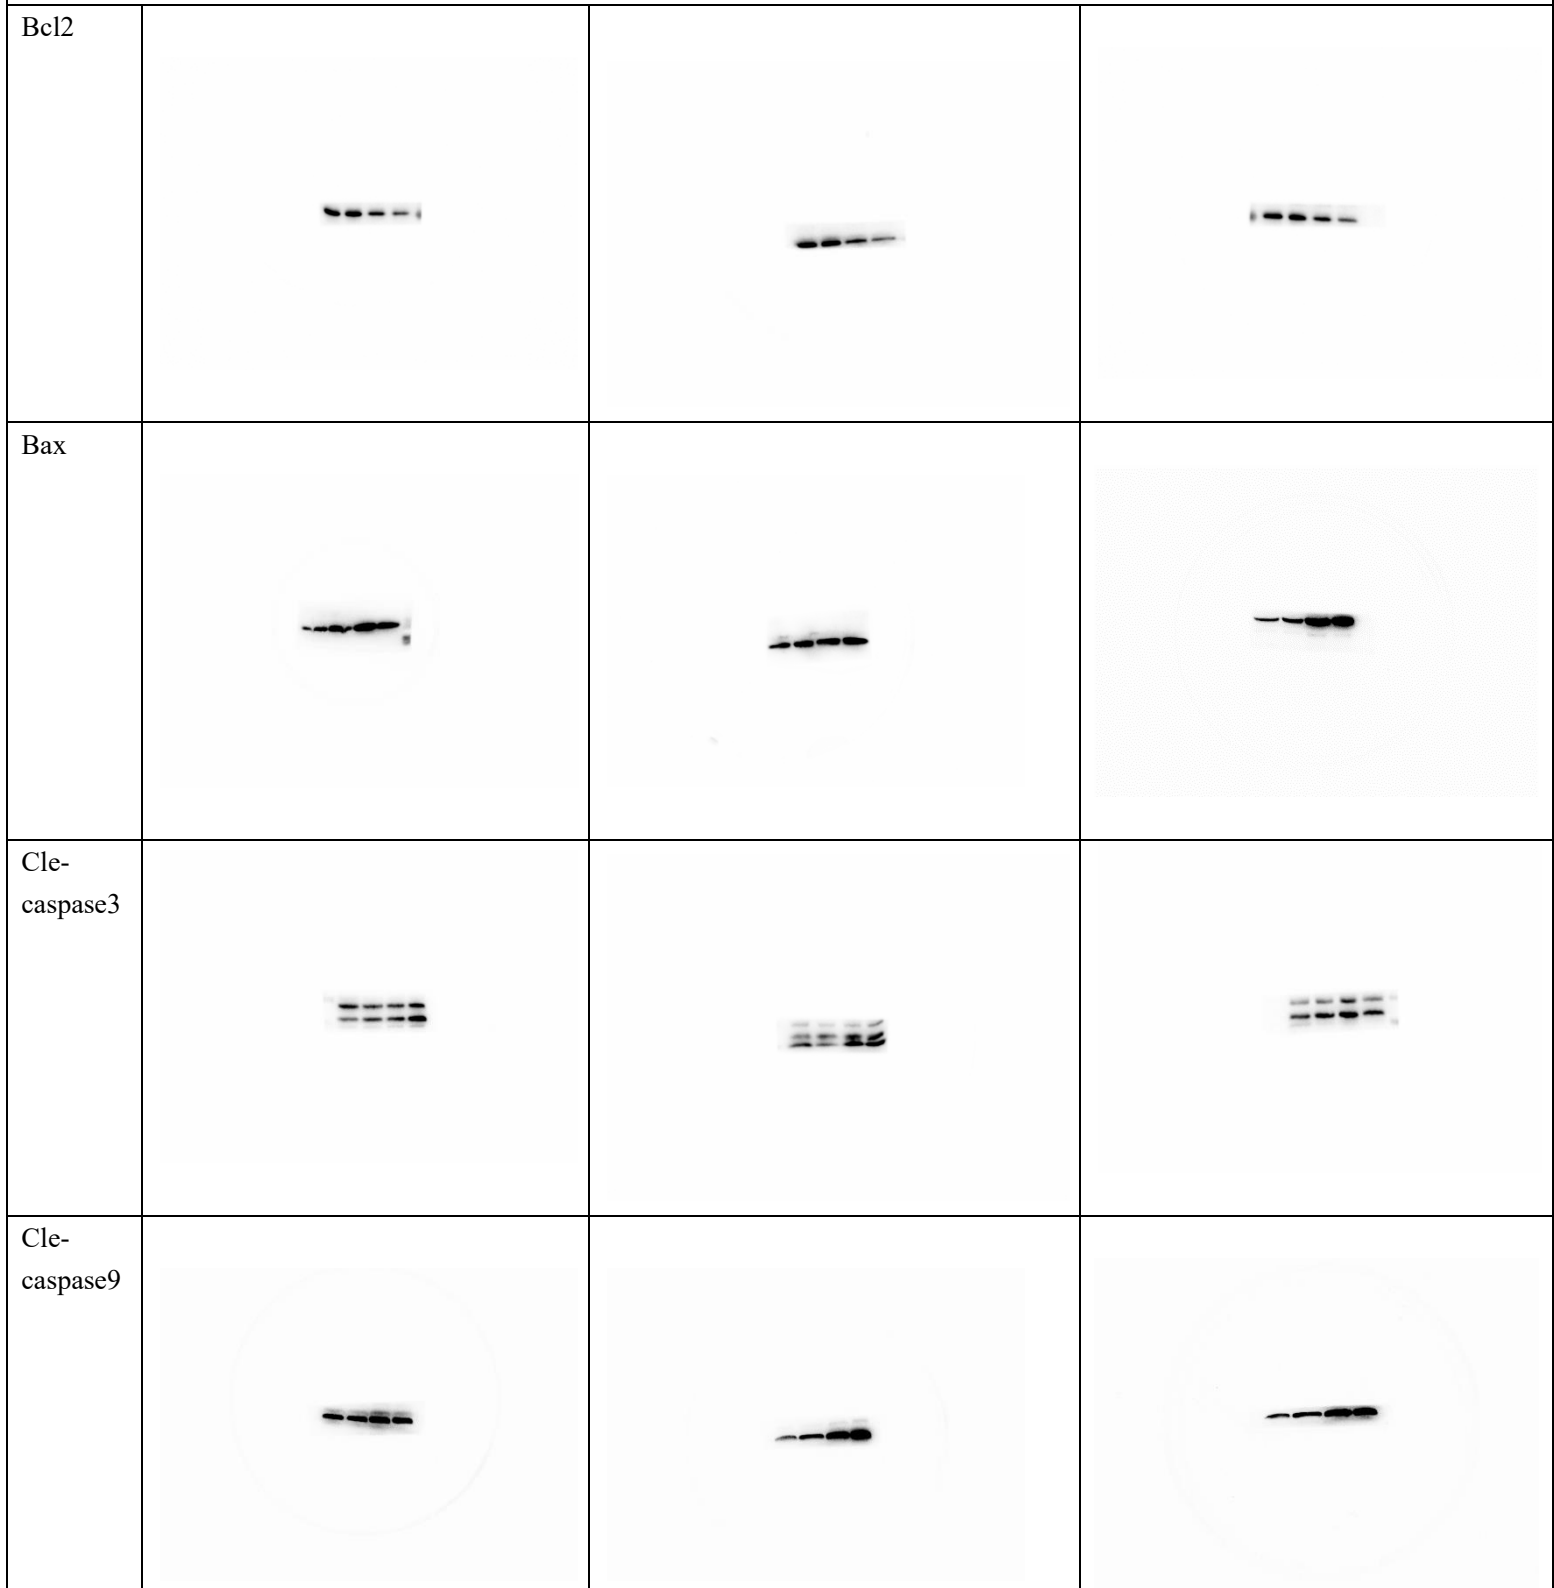

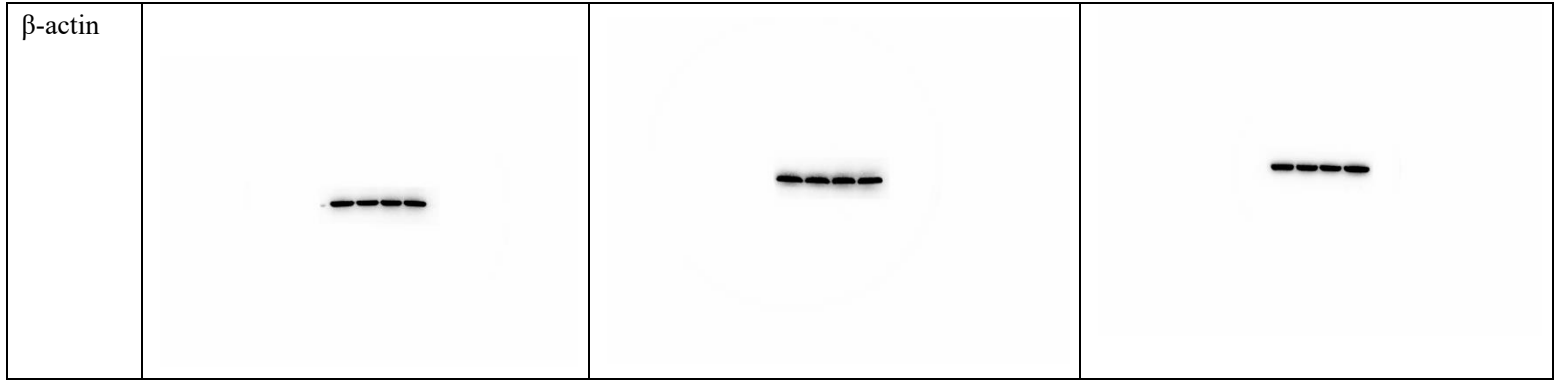

Figure 3E (H226)

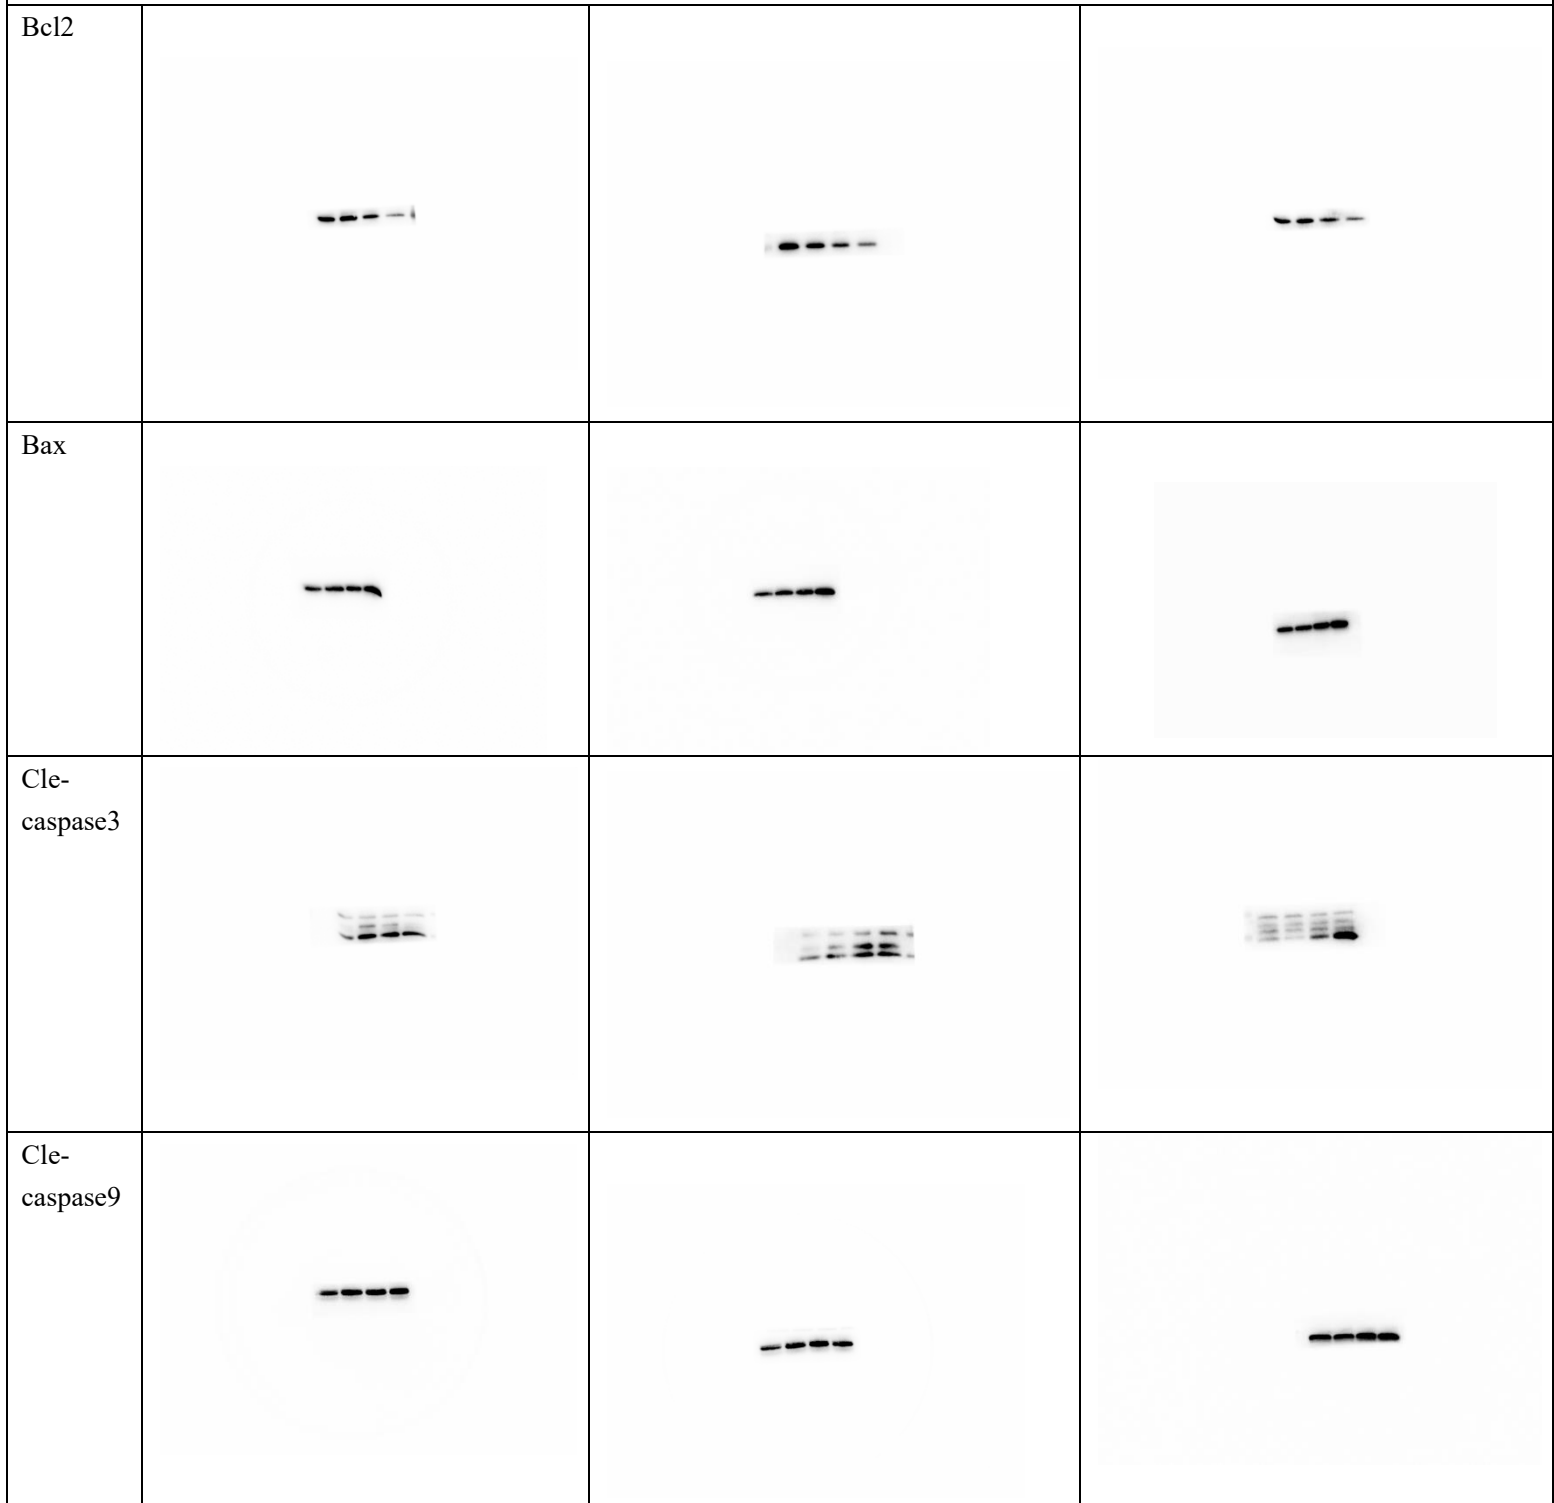

|                |                                                                                   |                                                                                    |                                                                                     |
|----------------|-----------------------------------------------------------------------------------|------------------------------------------------------------------------------------|-------------------------------------------------------------------------------------|
| $\beta$ -actin |  |  |  |
|----------------|-----------------------------------------------------------------------------------|------------------------------------------------------------------------------------|-------------------------------------------------------------------------------------|

Figure 4B (A549)

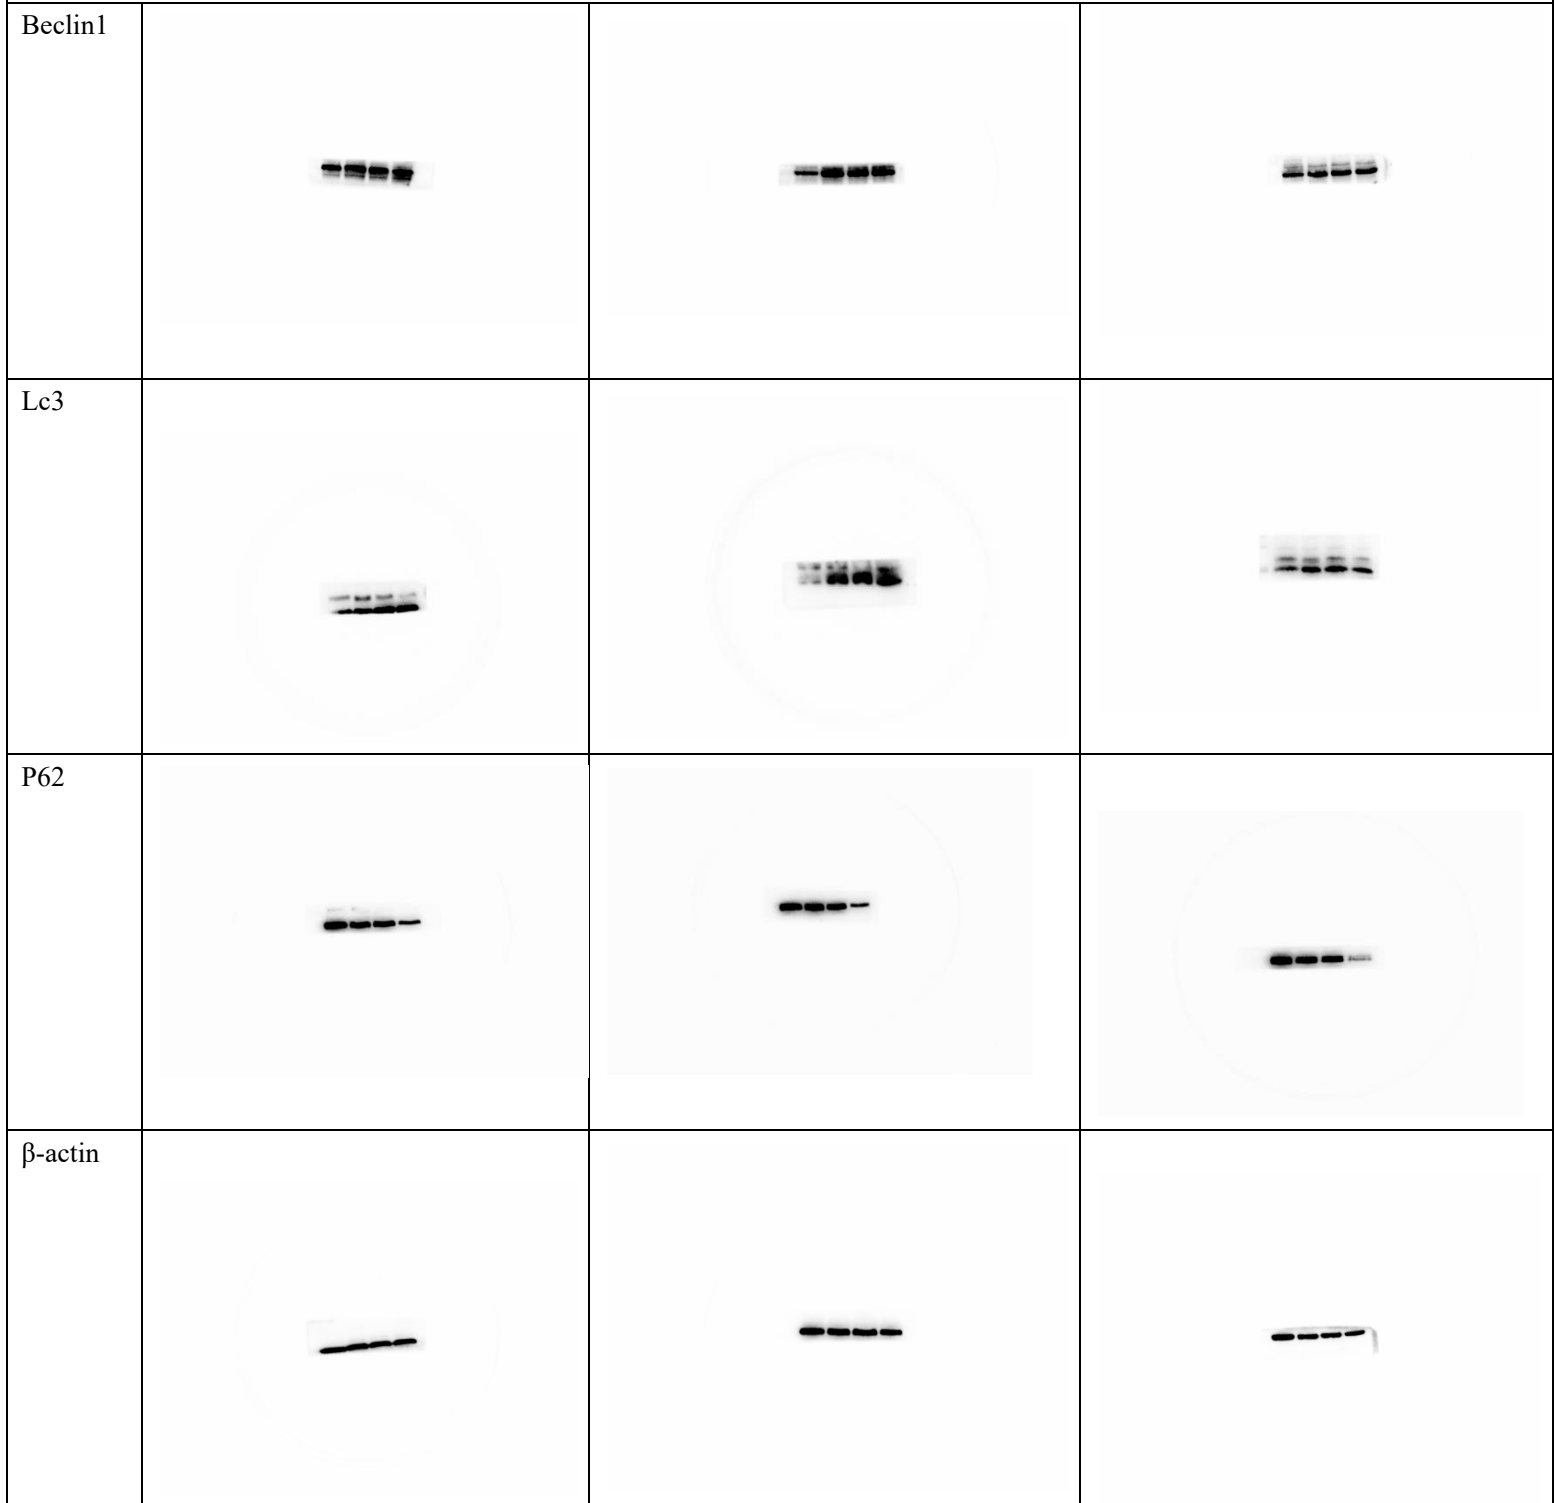

Figure 4B (H1299)

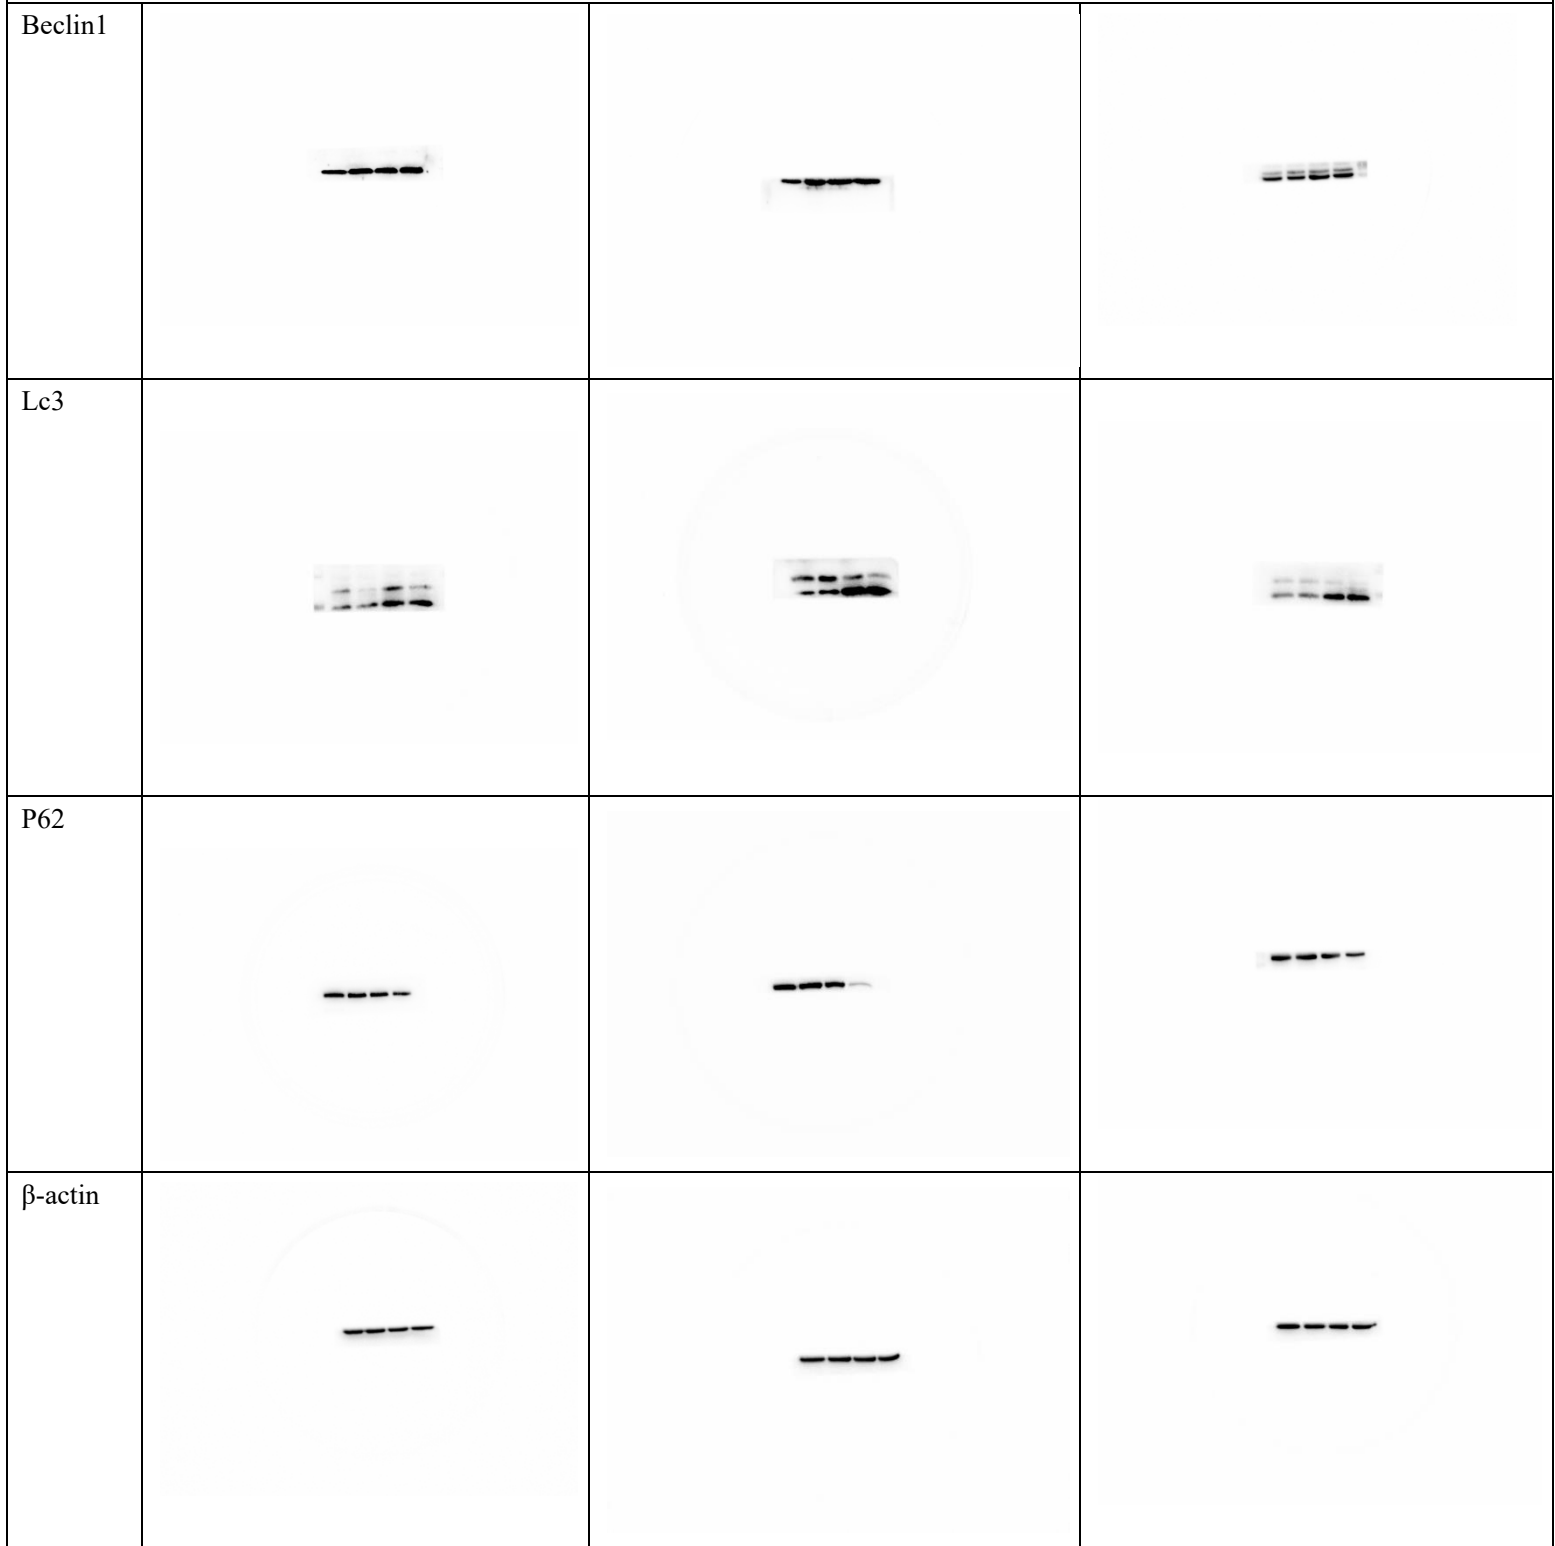

Figure 4B (H226)

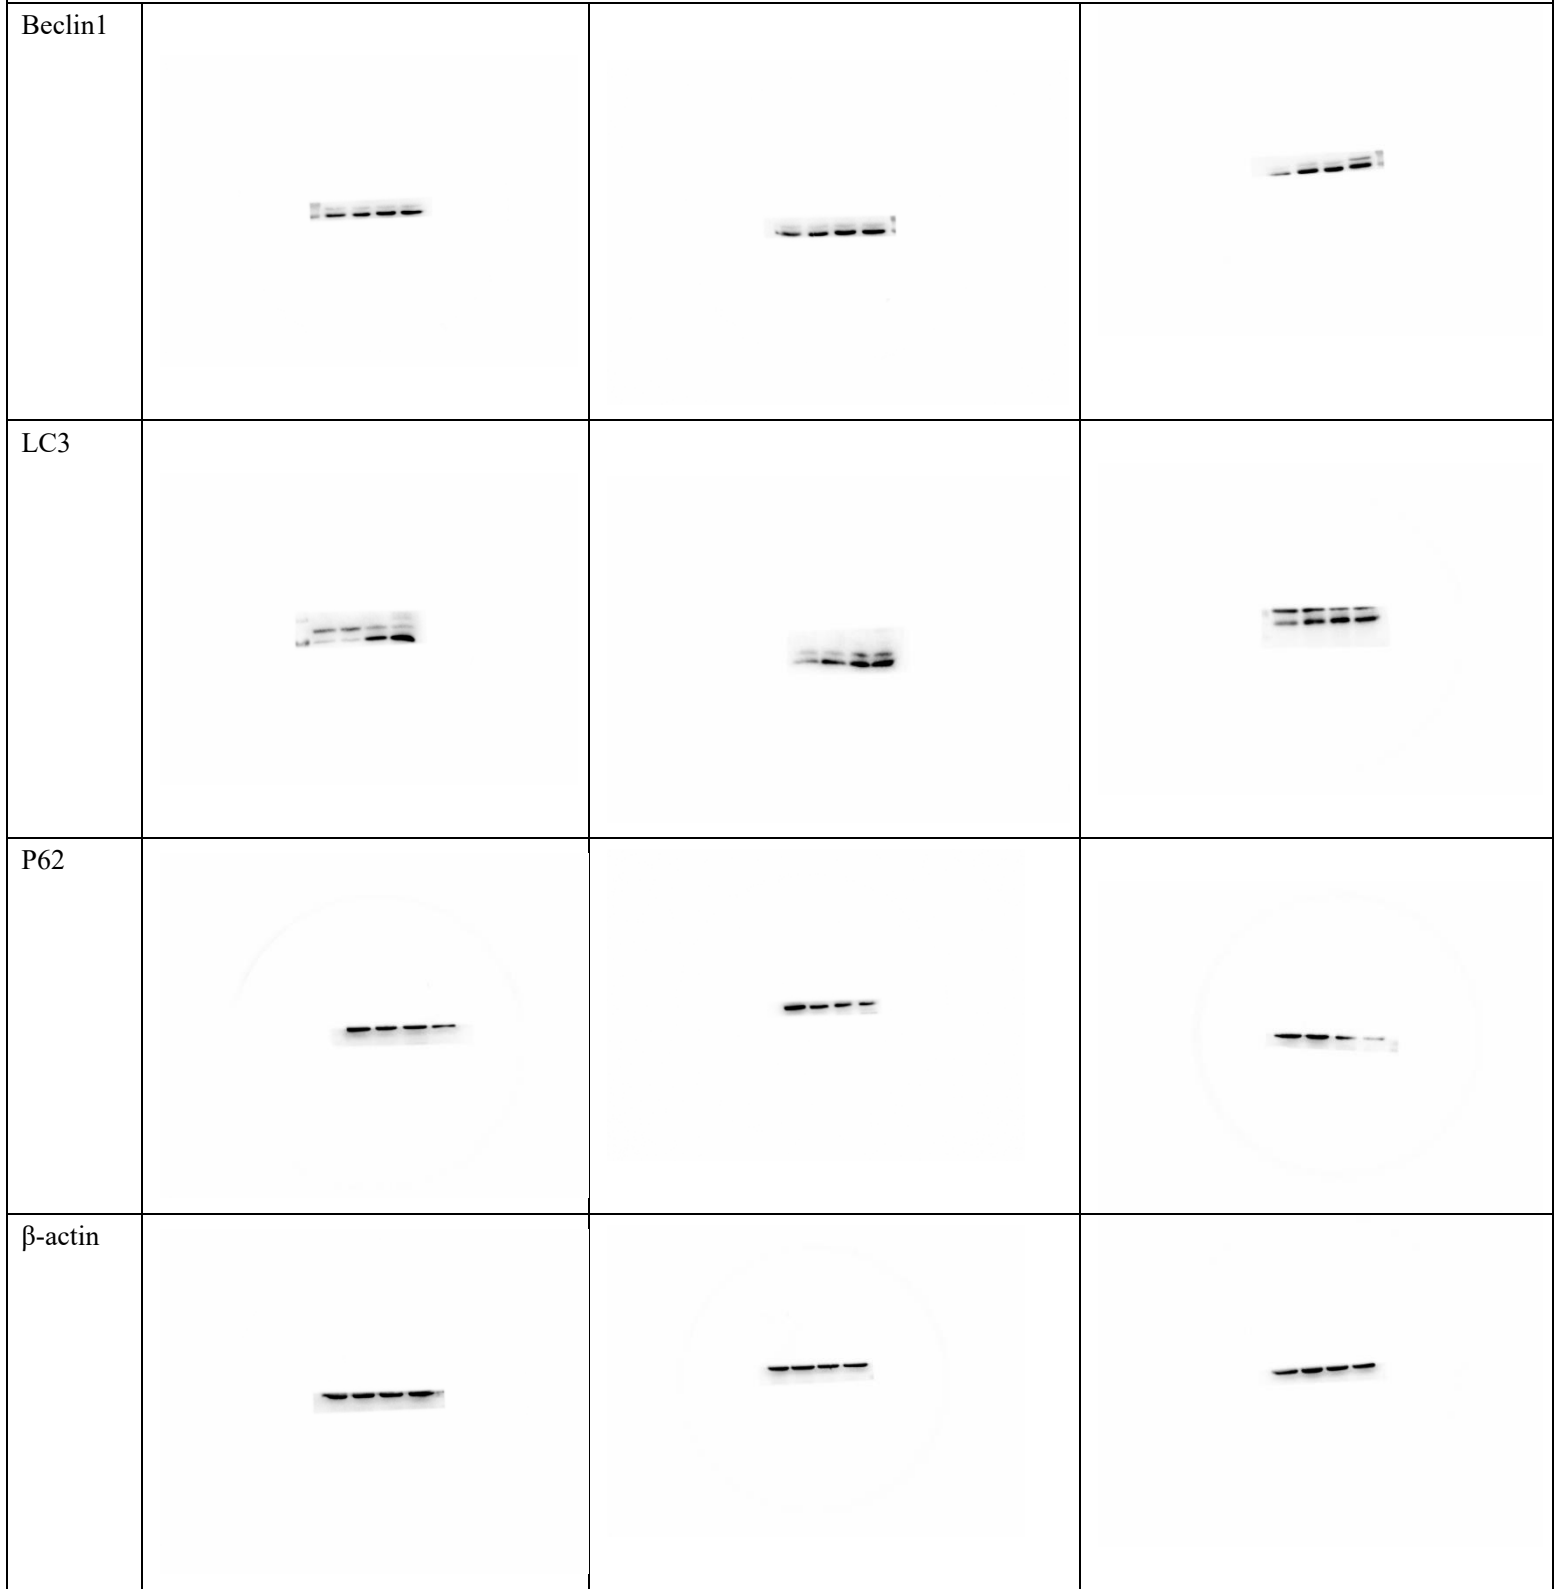



Figure 4D (A549)

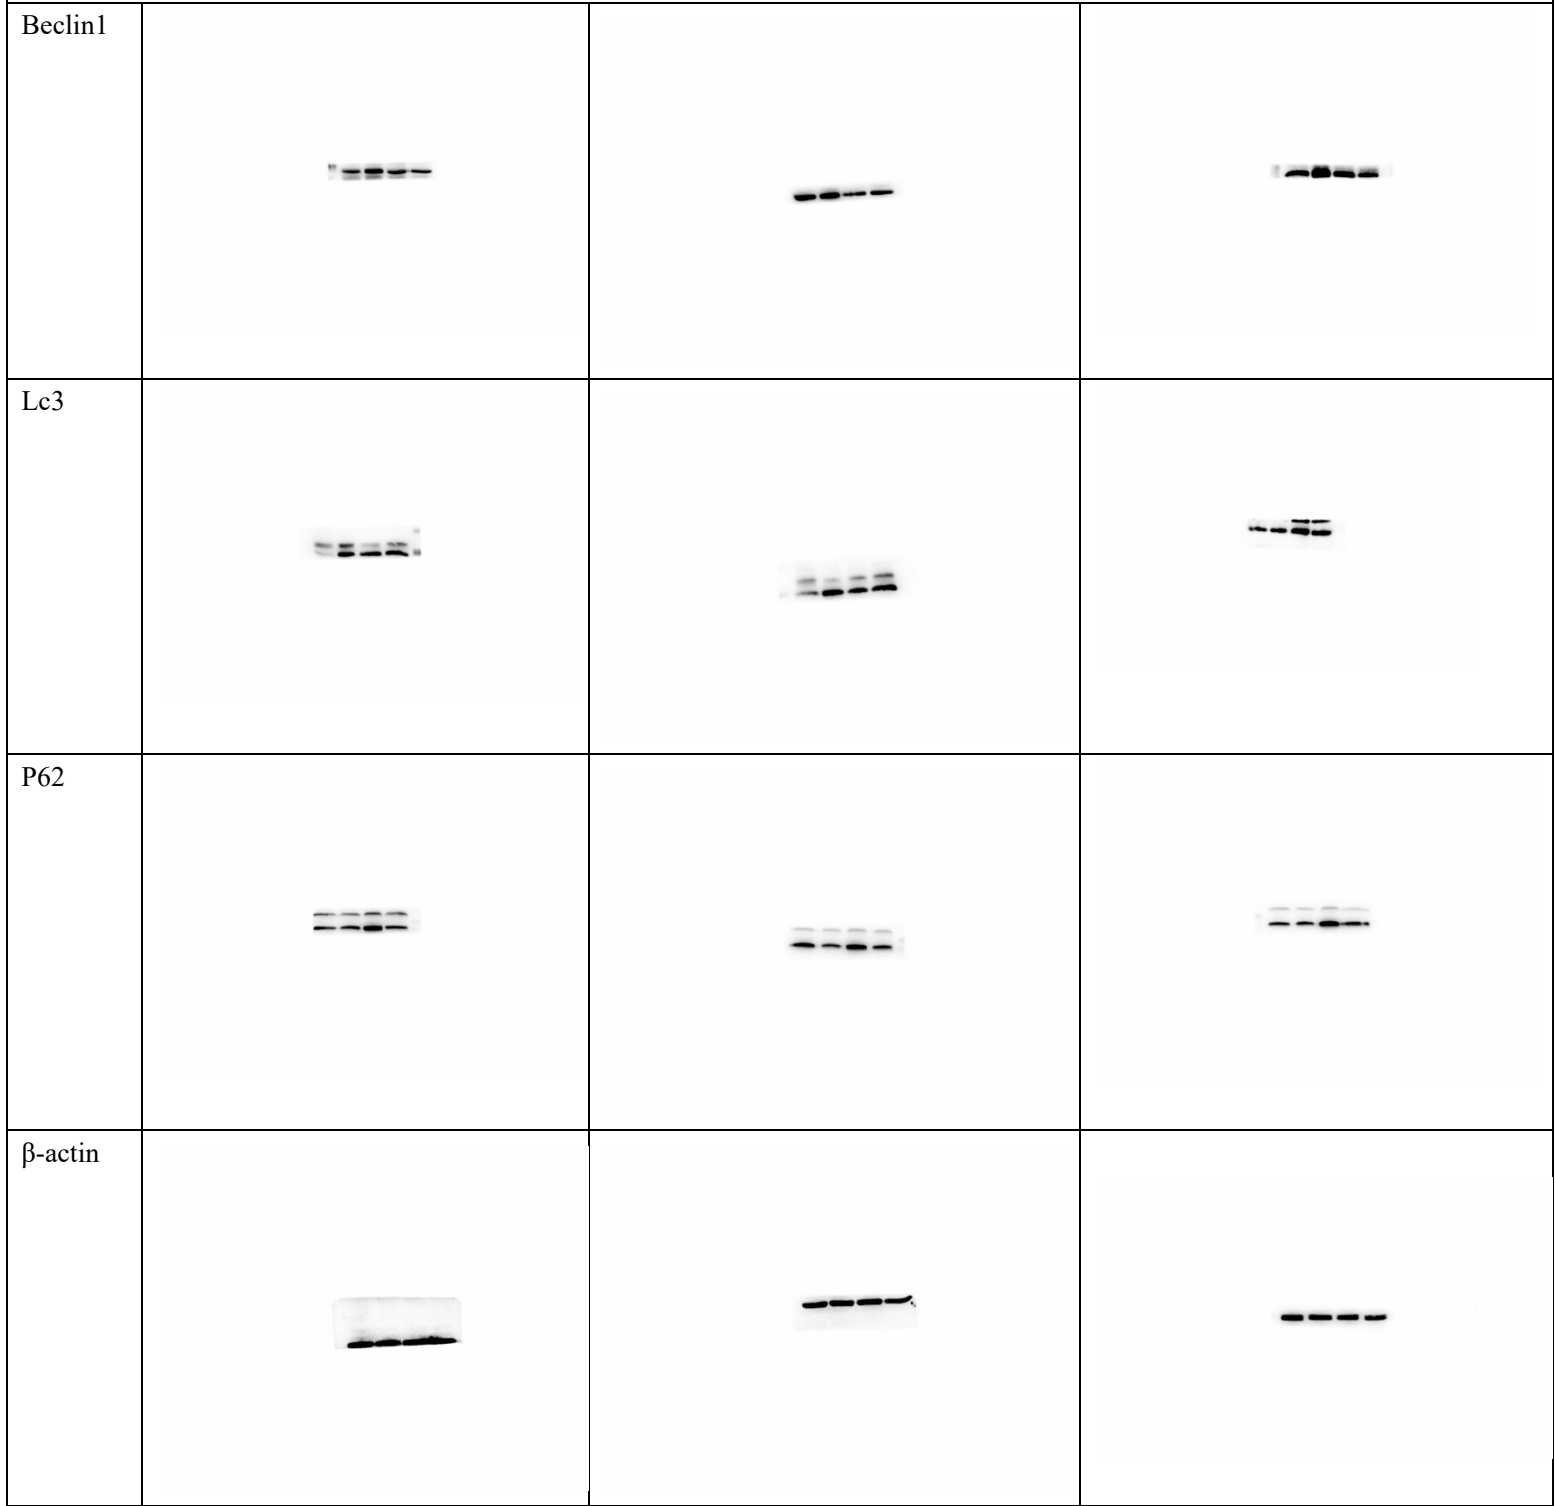

Figure 4 D (H1299)

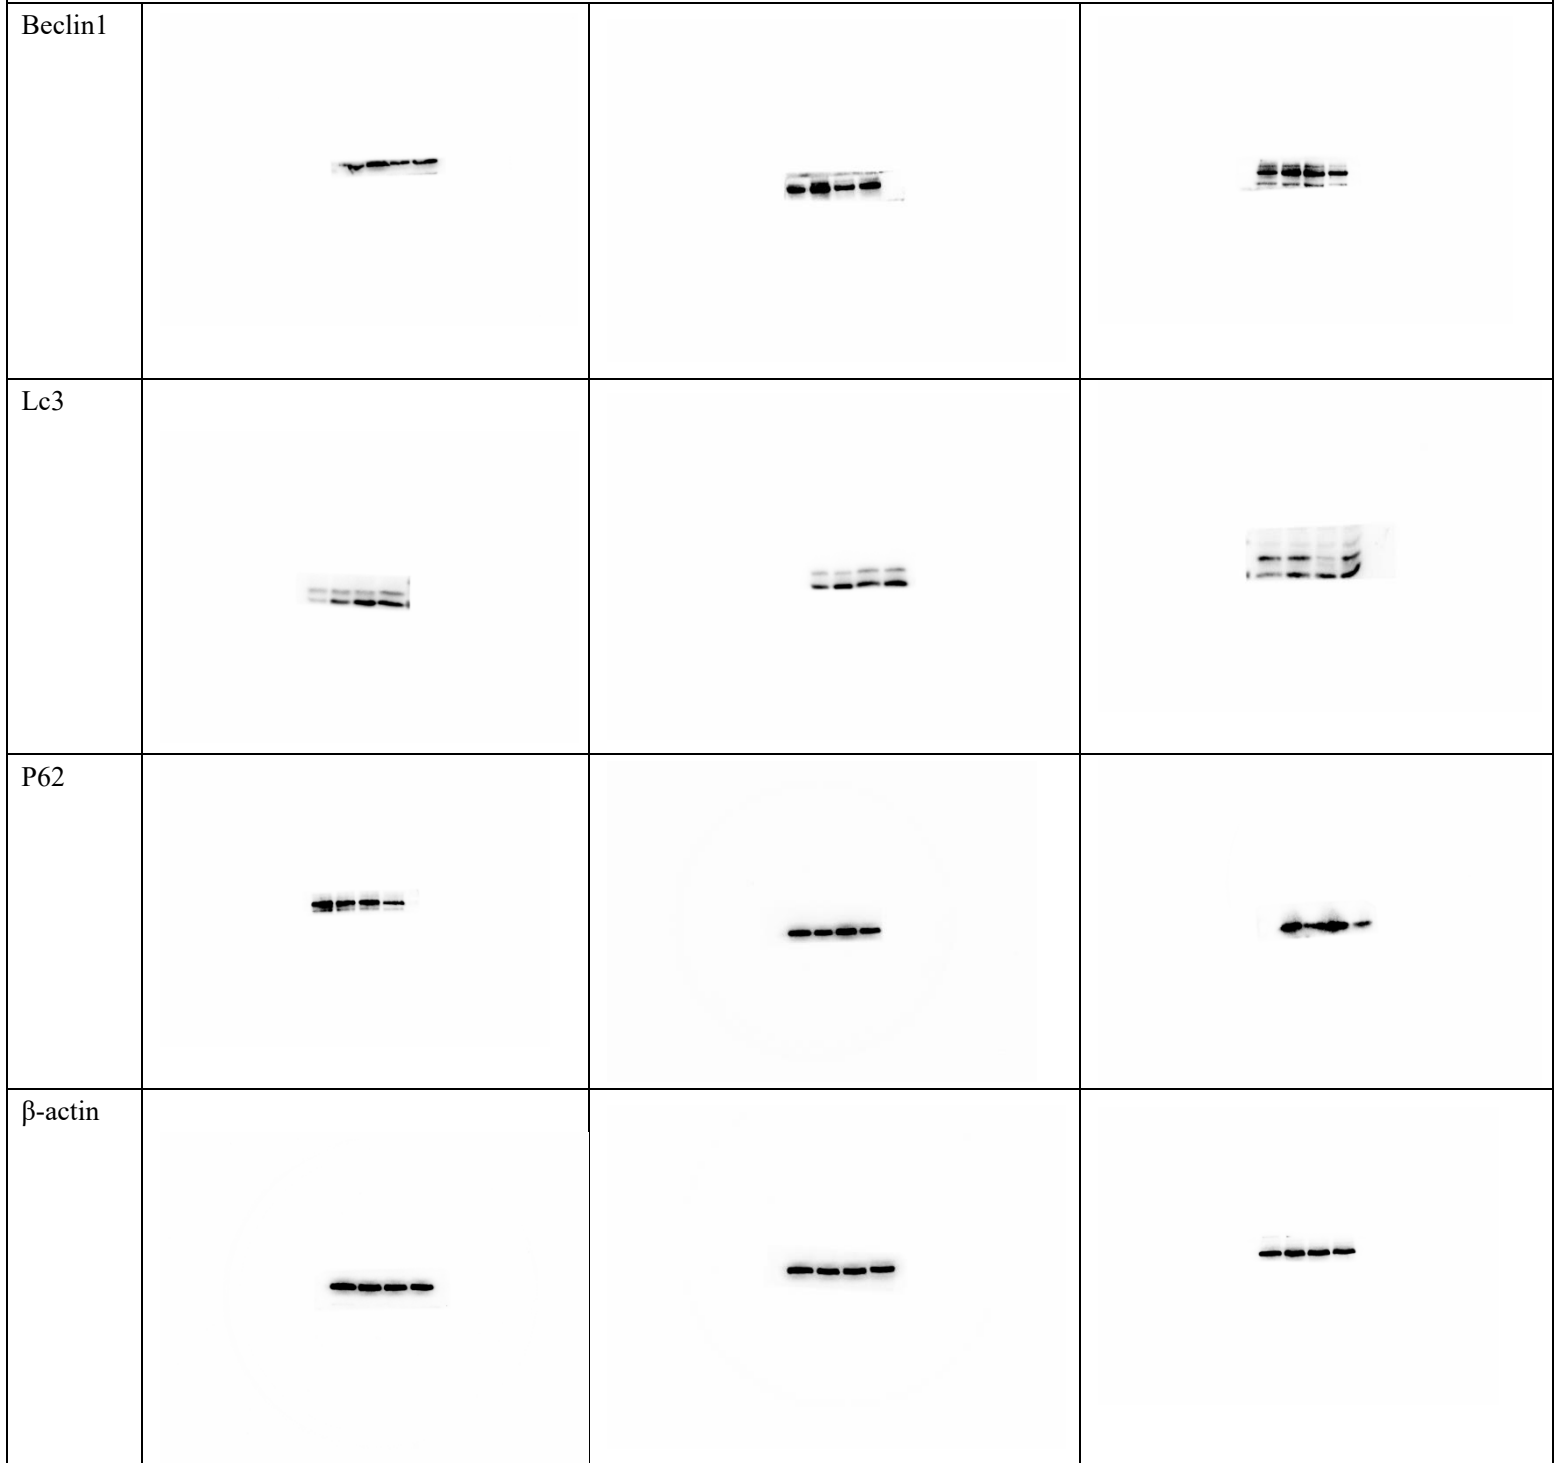

Figure 4D (H226)

|                |                                                                                     |                                                                                      |                                                                                       |
|----------------|-------------------------------------------------------------------------------------|--------------------------------------------------------------------------------------|---------------------------------------------------------------------------------------|
| Beclin1        |    |    |    |
| LC3            |   |   |   |
| P62            |  |  |  |
| $\beta$ -actin |  |  |  |

Figure 4F (A549)

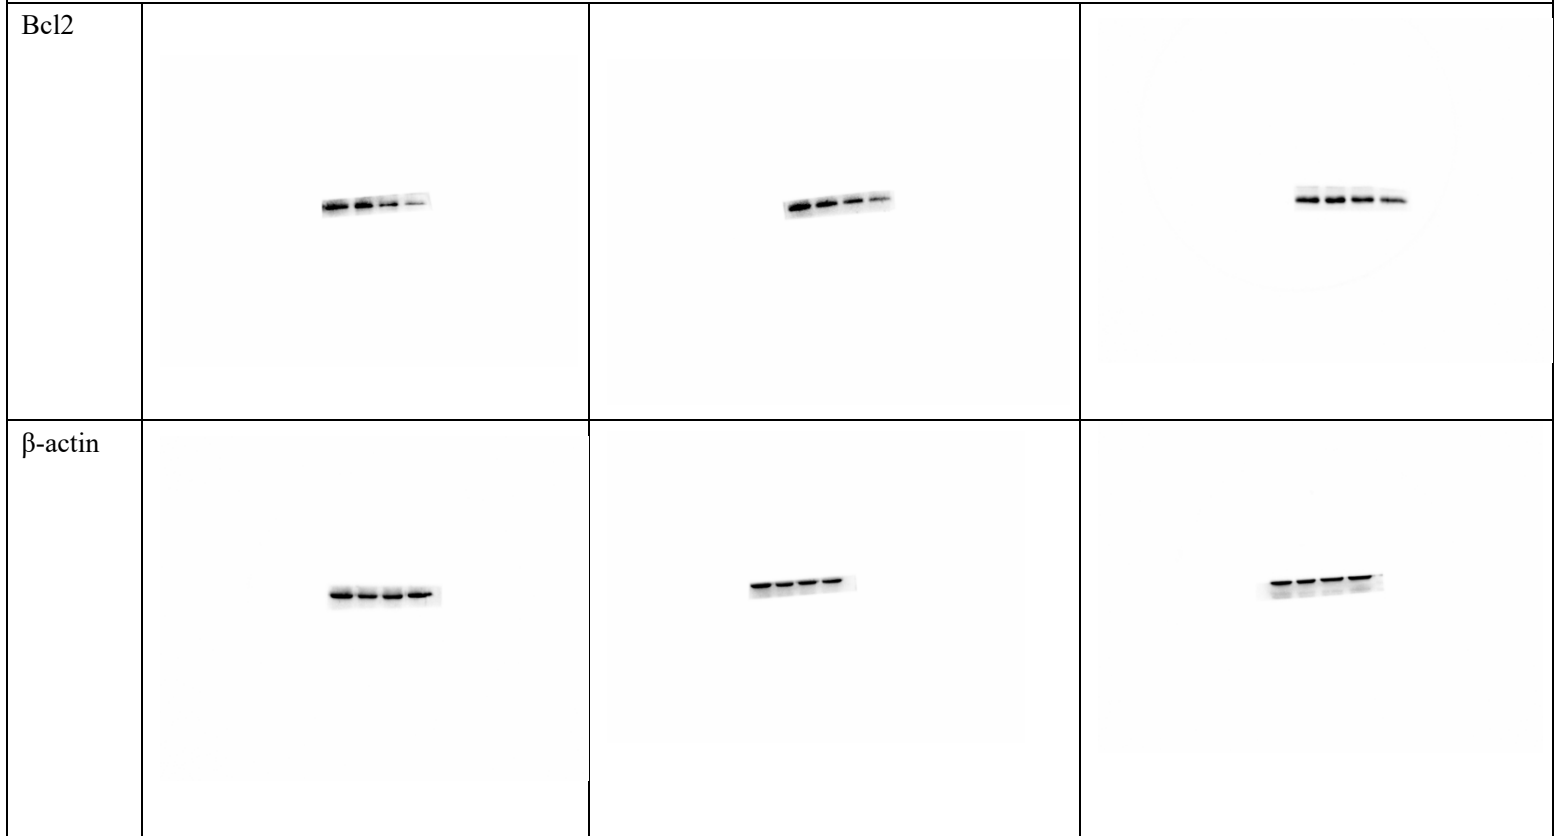

Figure 4F (H1299)

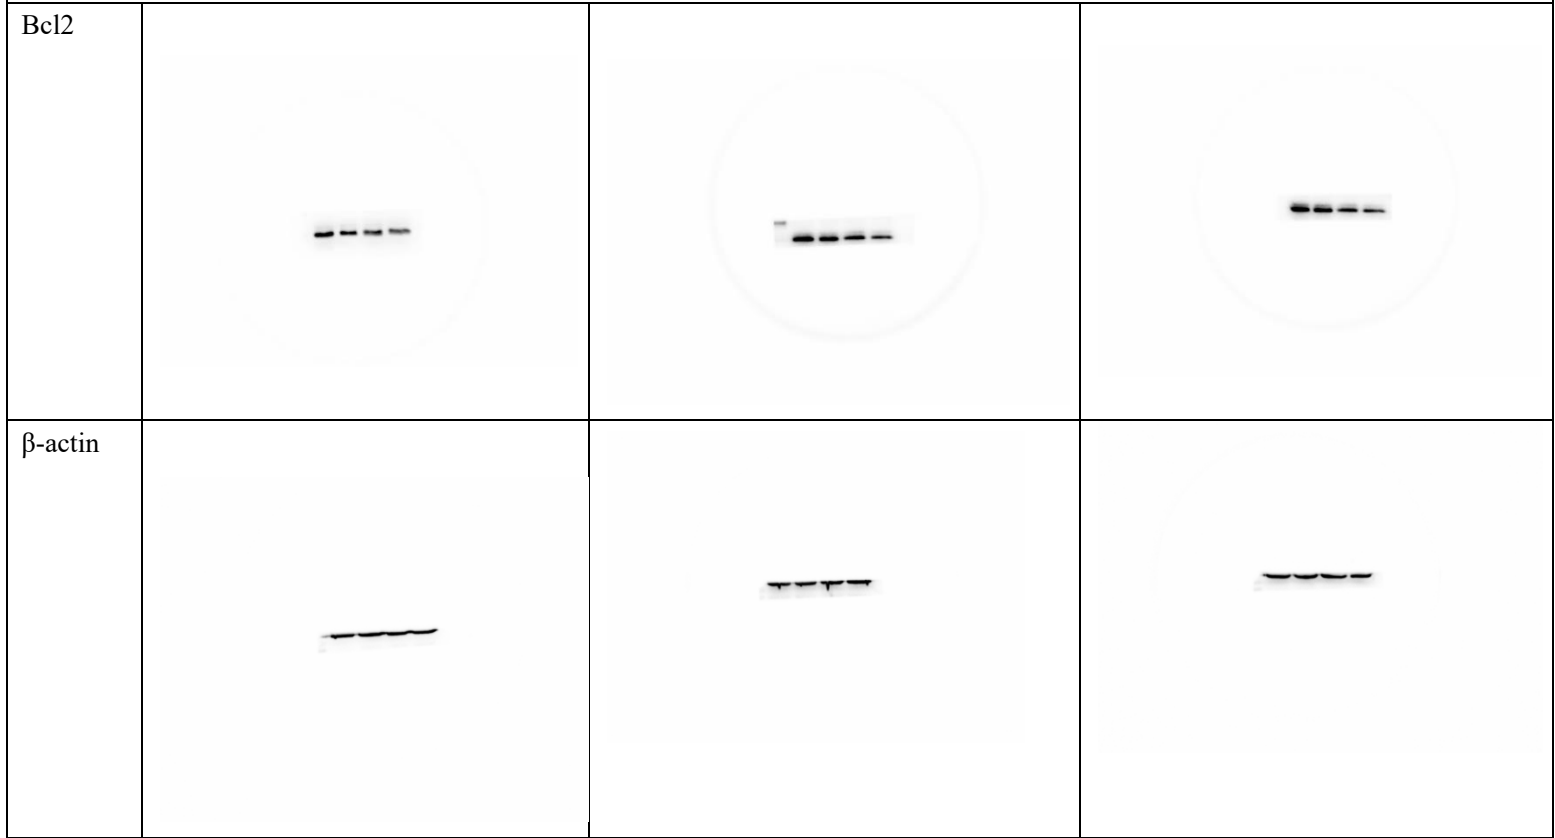

Figure 4F (H226)

|         |                                                                                   |                                                                                   |                                                                                     |
|---------|-----------------------------------------------------------------------------------|-----------------------------------------------------------------------------------|-------------------------------------------------------------------------------------|
| Bcl2    |  |  |  |
| β-actin |  |  |  |

Figure 6A (A549)

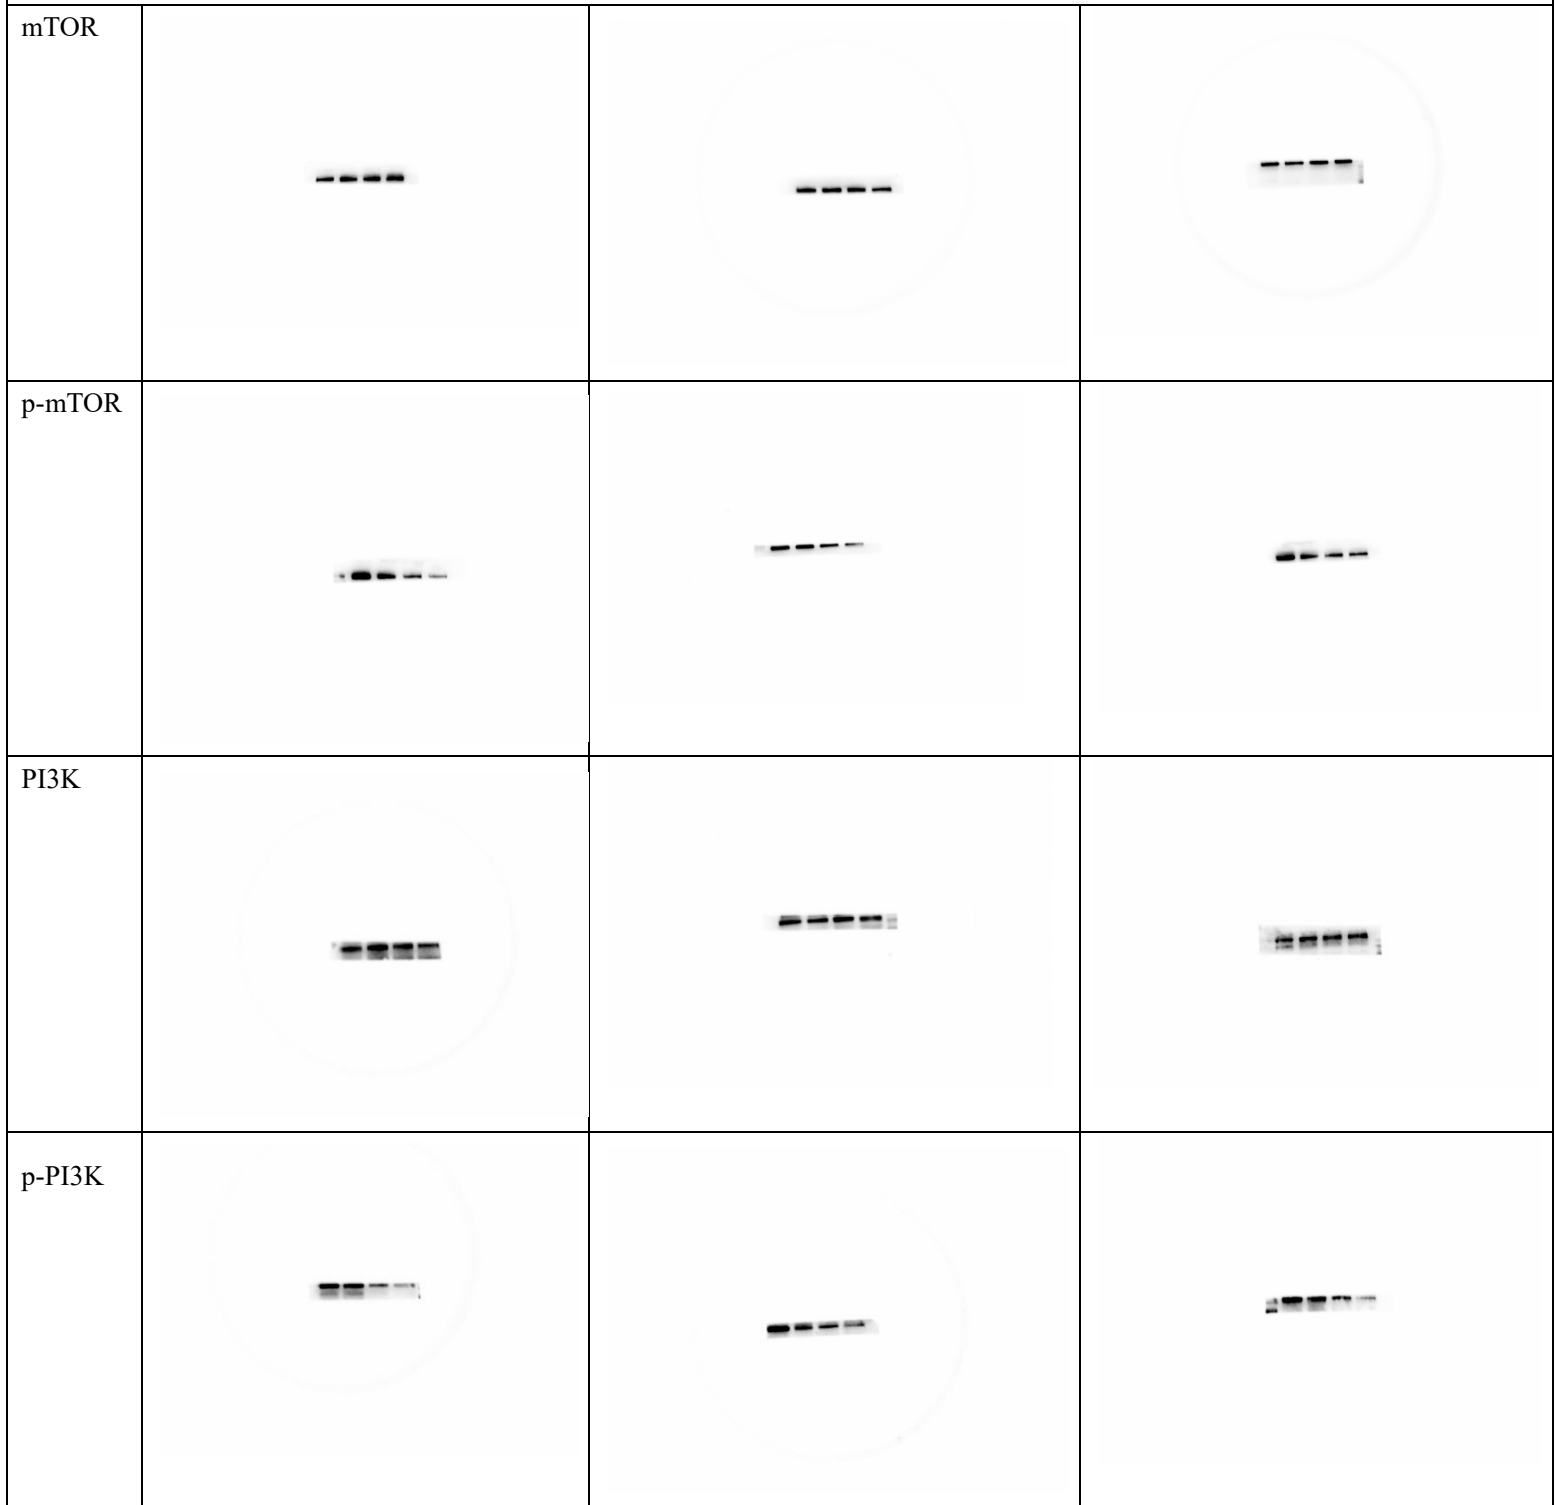

|                |                                                                                     |                                                                                      |                                                                                       |
|----------------|-------------------------------------------------------------------------------------|--------------------------------------------------------------------------------------|---------------------------------------------------------------------------------------|
| AKT            |    |    |    |
| P-AKT          |   |   |   |
| $\beta$ -actin |  |  |  |



Figure 6A (H1299)

|        |                                                                                     |                                                                                      |                                                                                       |
|--------|-------------------------------------------------------------------------------------|--------------------------------------------------------------------------------------|---------------------------------------------------------------------------------------|
| mTOR   |    |    |    |
| p-mTOR |    |    |    |
| PI3K   |   |   |   |
| p-PI3K |  |  |  |

|                |                                                                                    |                                                                                     |                                                                                      |
|----------------|------------------------------------------------------------------------------------|-------------------------------------------------------------------------------------|--------------------------------------------------------------------------------------|
| AKT            | 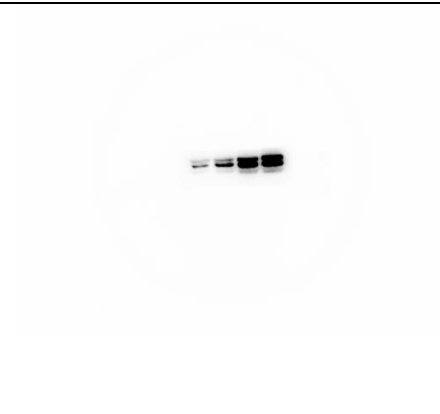  |   |   |
| p-AKT          |   |   |   |
| $\beta$ -actin |  |  |  |

Figure 6A (H226)

|        |                                                                                     |                                                                                      |                                                                                       |
|--------|-------------------------------------------------------------------------------------|--------------------------------------------------------------------------------------|---------------------------------------------------------------------------------------|
| mTOR   |    |    |    |
| p-mTOR |   |   |   |
| PI3K   |  |  |  |
| p-PI3K |  |  |  |

|         |                                                                                     |                                                                                      |                                                                                       |
|---------|-------------------------------------------------------------------------------------|--------------------------------------------------------------------------------------|---------------------------------------------------------------------------------------|
| AKT     |    |    |    |
| p-AKT   |    |    |    |
| β-actin |  |  |  |

Figure 6C (A549)

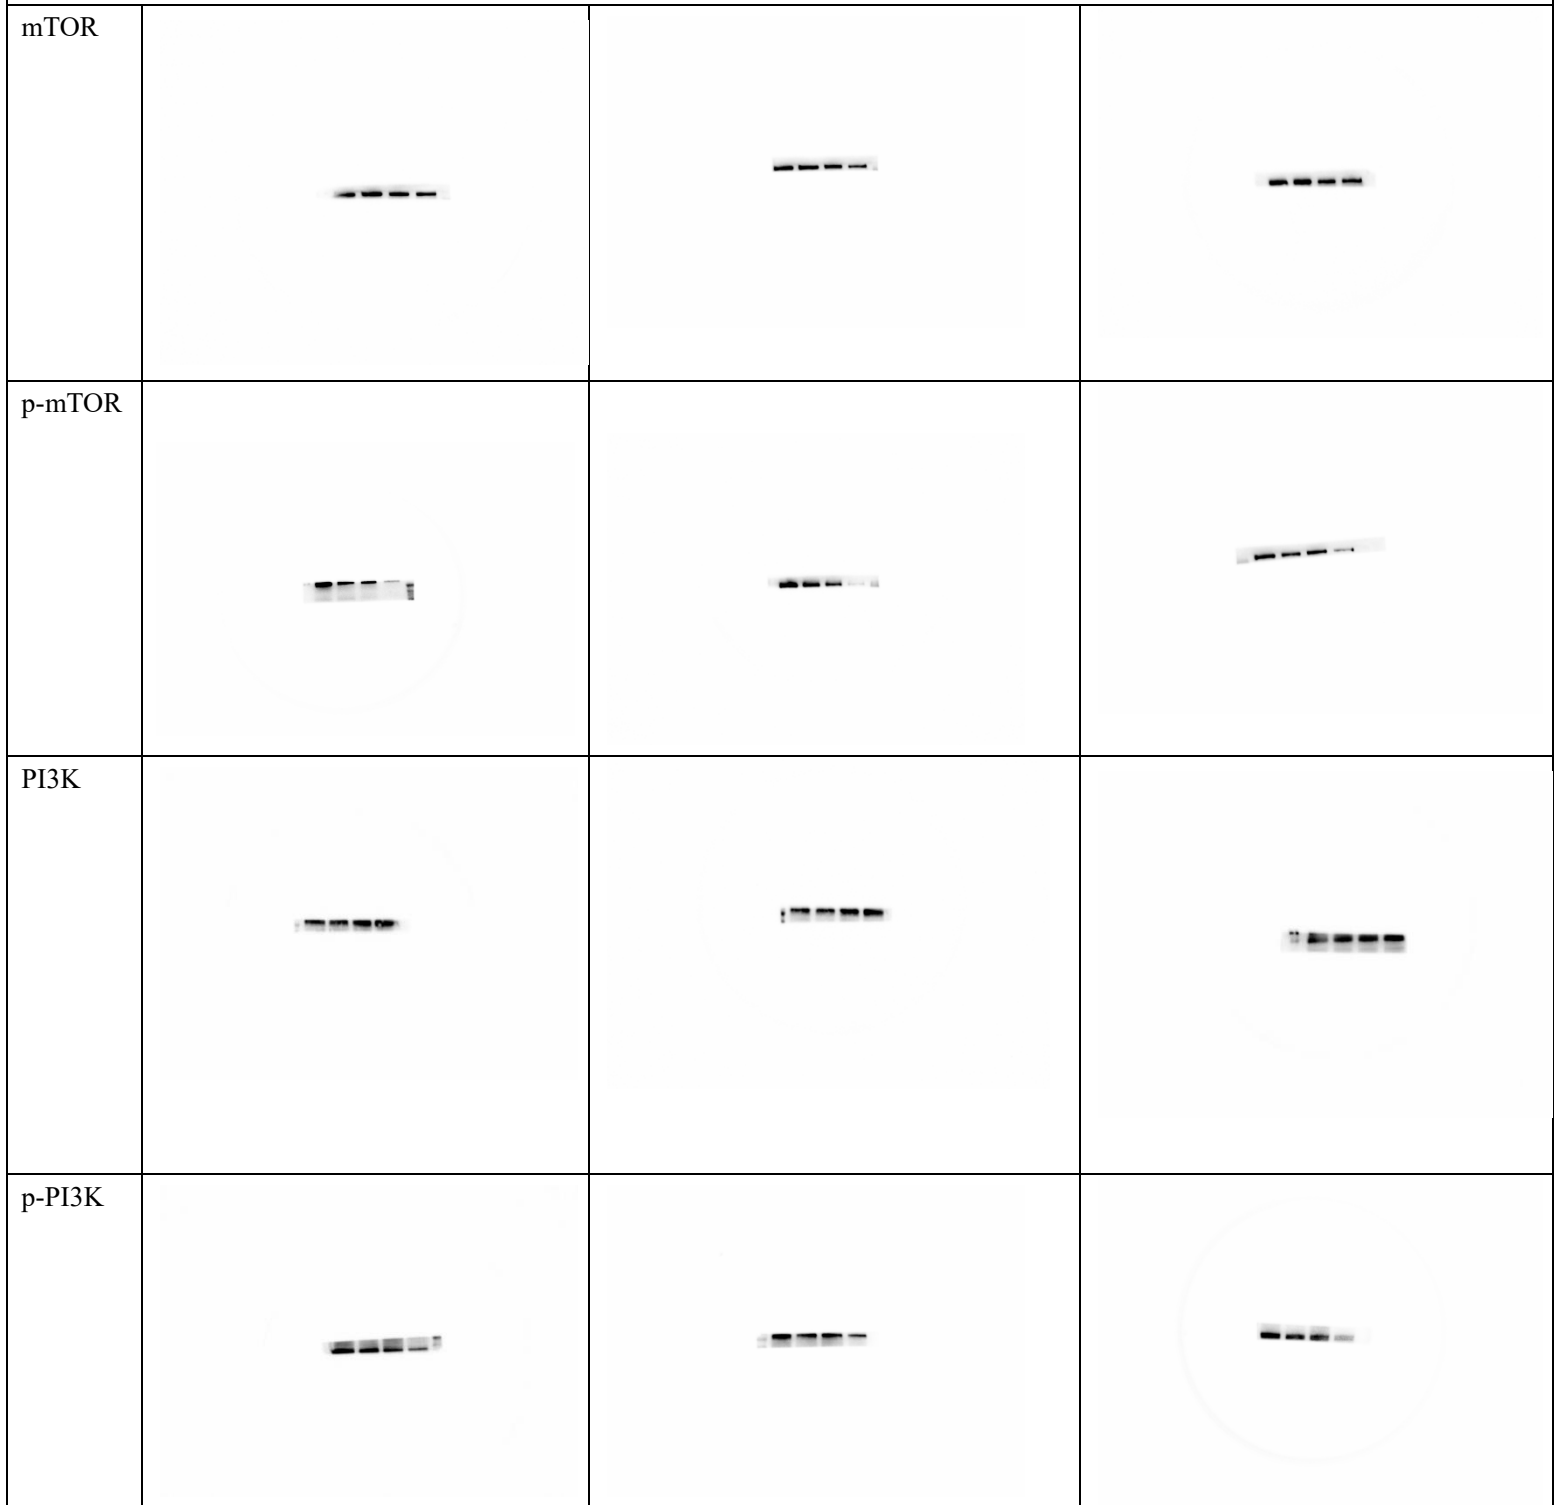

|                |                                                                                    |                                                                                     |                                                                                      |
|----------------|------------------------------------------------------------------------------------|-------------------------------------------------------------------------------------|--------------------------------------------------------------------------------------|
| AKT            |   |   |   |
| p-AKT          |   |   |   |
| $\beta$ -actin |  |  |  |

Figure 6C (H1299)

|        |                                                                                     |                                                                                      |                                                                                       |
|--------|-------------------------------------------------------------------------------------|--------------------------------------------------------------------------------------|---------------------------------------------------------------------------------------|
| mTOR   |    |    |    |
| p-mTOR |   |   |   |
| PI3K   |  |  |  |
| p-PI3K |  |  |  |

|                |                                                                                     |                                                                                     |                                                                                       |
|----------------|-------------------------------------------------------------------------------------|-------------------------------------------------------------------------------------|---------------------------------------------------------------------------------------|
| AKT            |    |    |    |
| p-AKT          |    |    |    |
| $\beta$ -actin |  |  |  |



Figure 6C (H226)

|        |                                                                                     |                                                                                      |                                                                                       |
|--------|-------------------------------------------------------------------------------------|--------------------------------------------------------------------------------------|---------------------------------------------------------------------------------------|
| mTOR   | 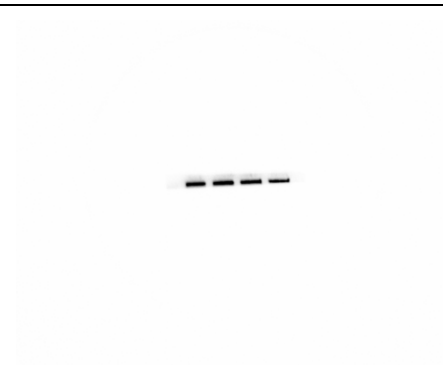   |    |    |
| p-mTOR |   |   |   |
| PI3K   |  |  |  |
| p-PI3K |  |  |  |

|         |                                                                                    |                                                                                     |                                                                                      |
|---------|------------------------------------------------------------------------------------|-------------------------------------------------------------------------------------|--------------------------------------------------------------------------------------|
| AKT     | 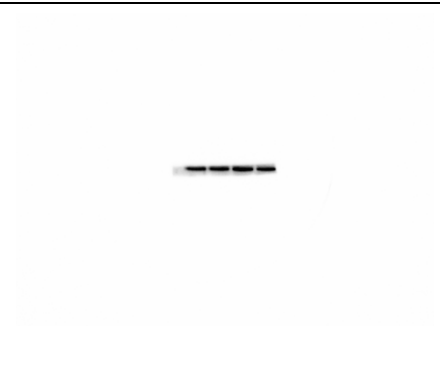  |   |   |
| p-AKT   |   |   |   |
| β-actin |  |  |  |

Figure 6E (A549)

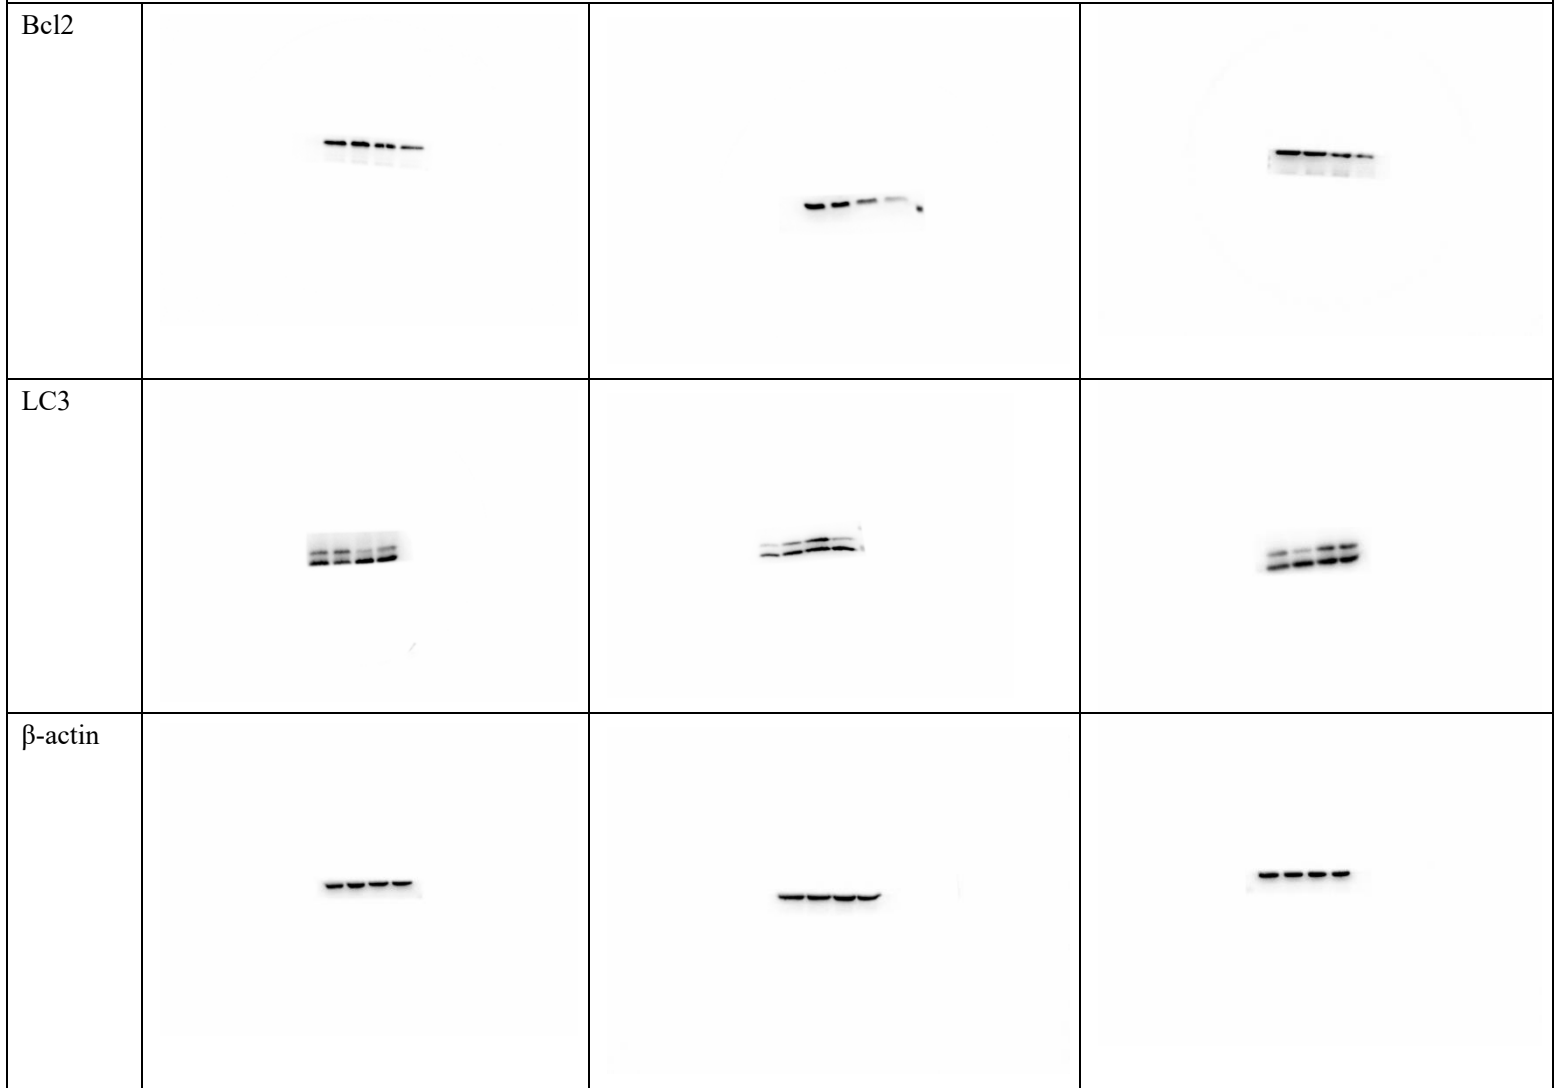

Figure 6E (H1299)

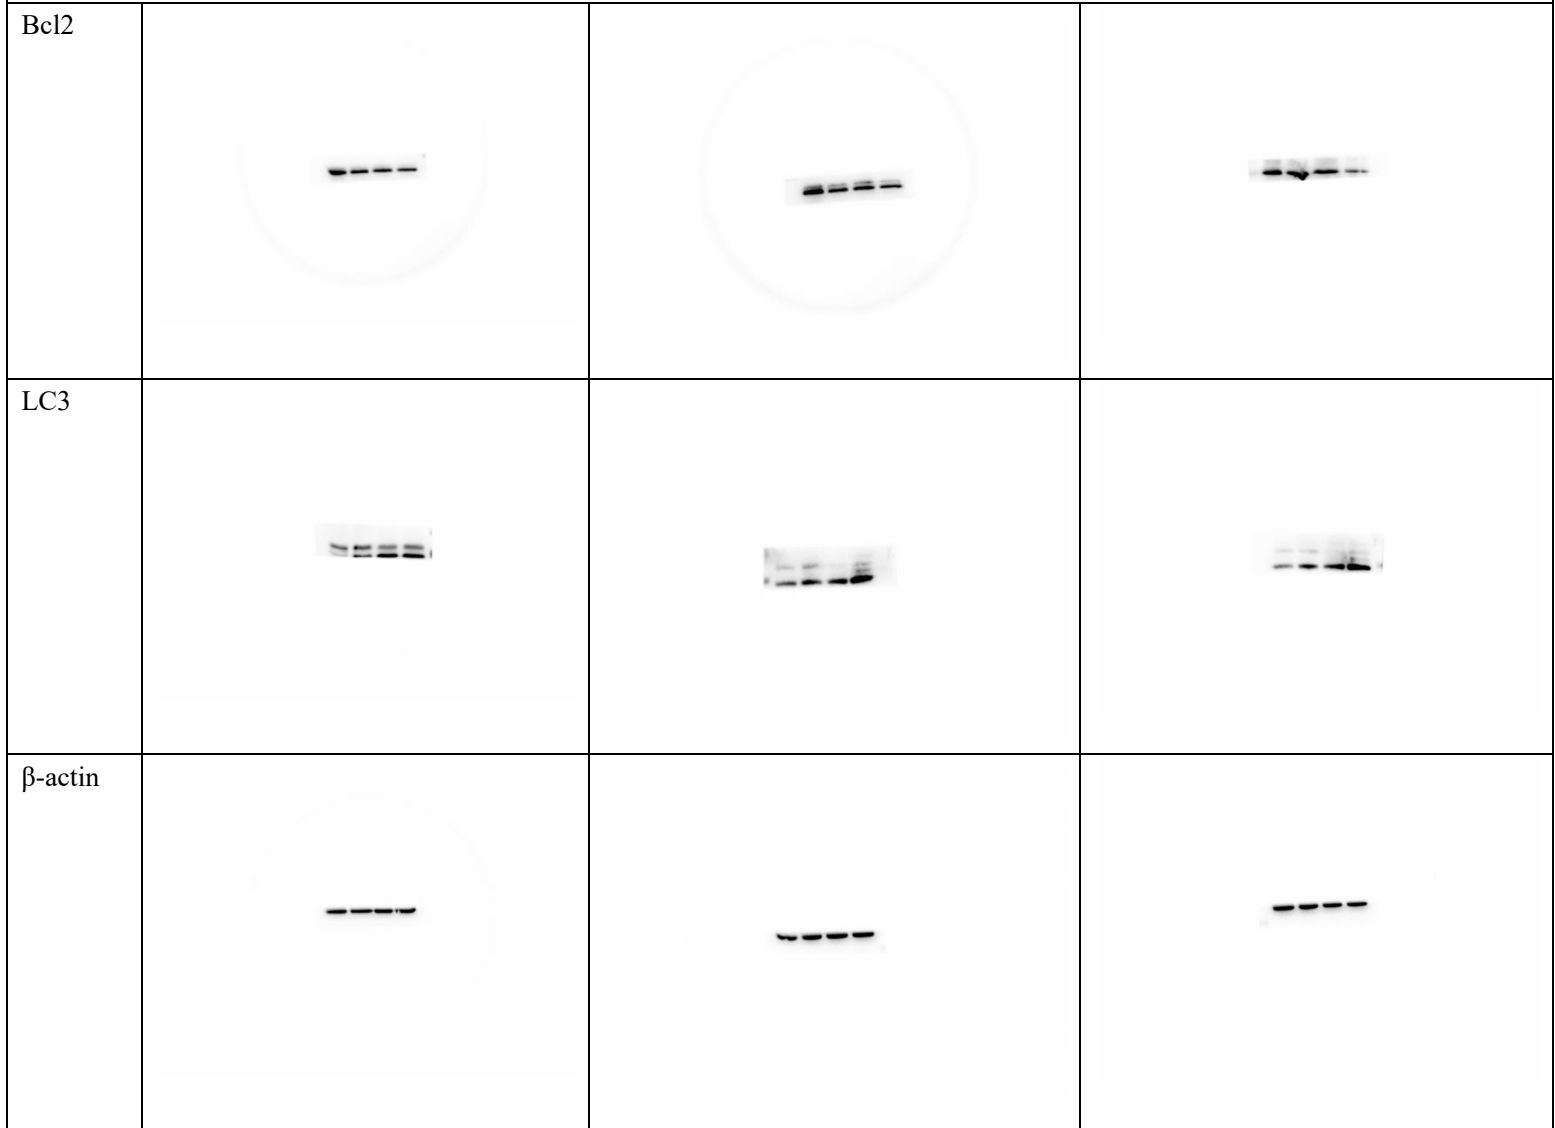

Figure 6E (H226)

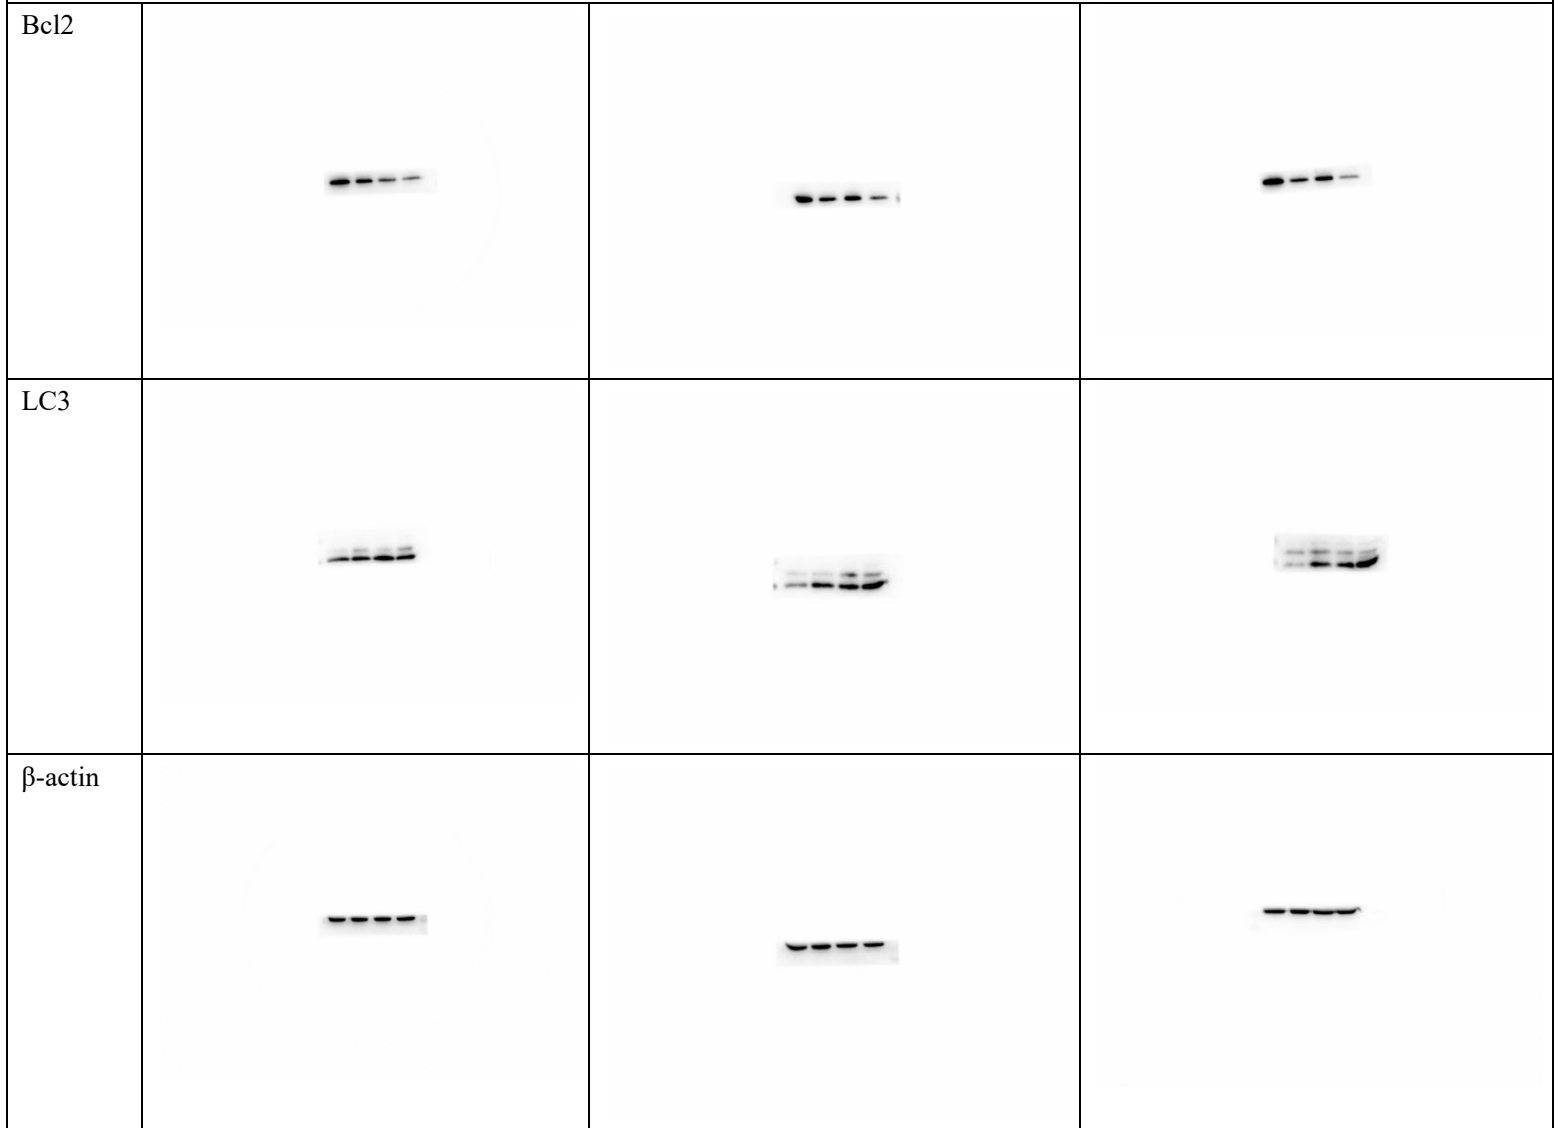

Figure 7D (A549)

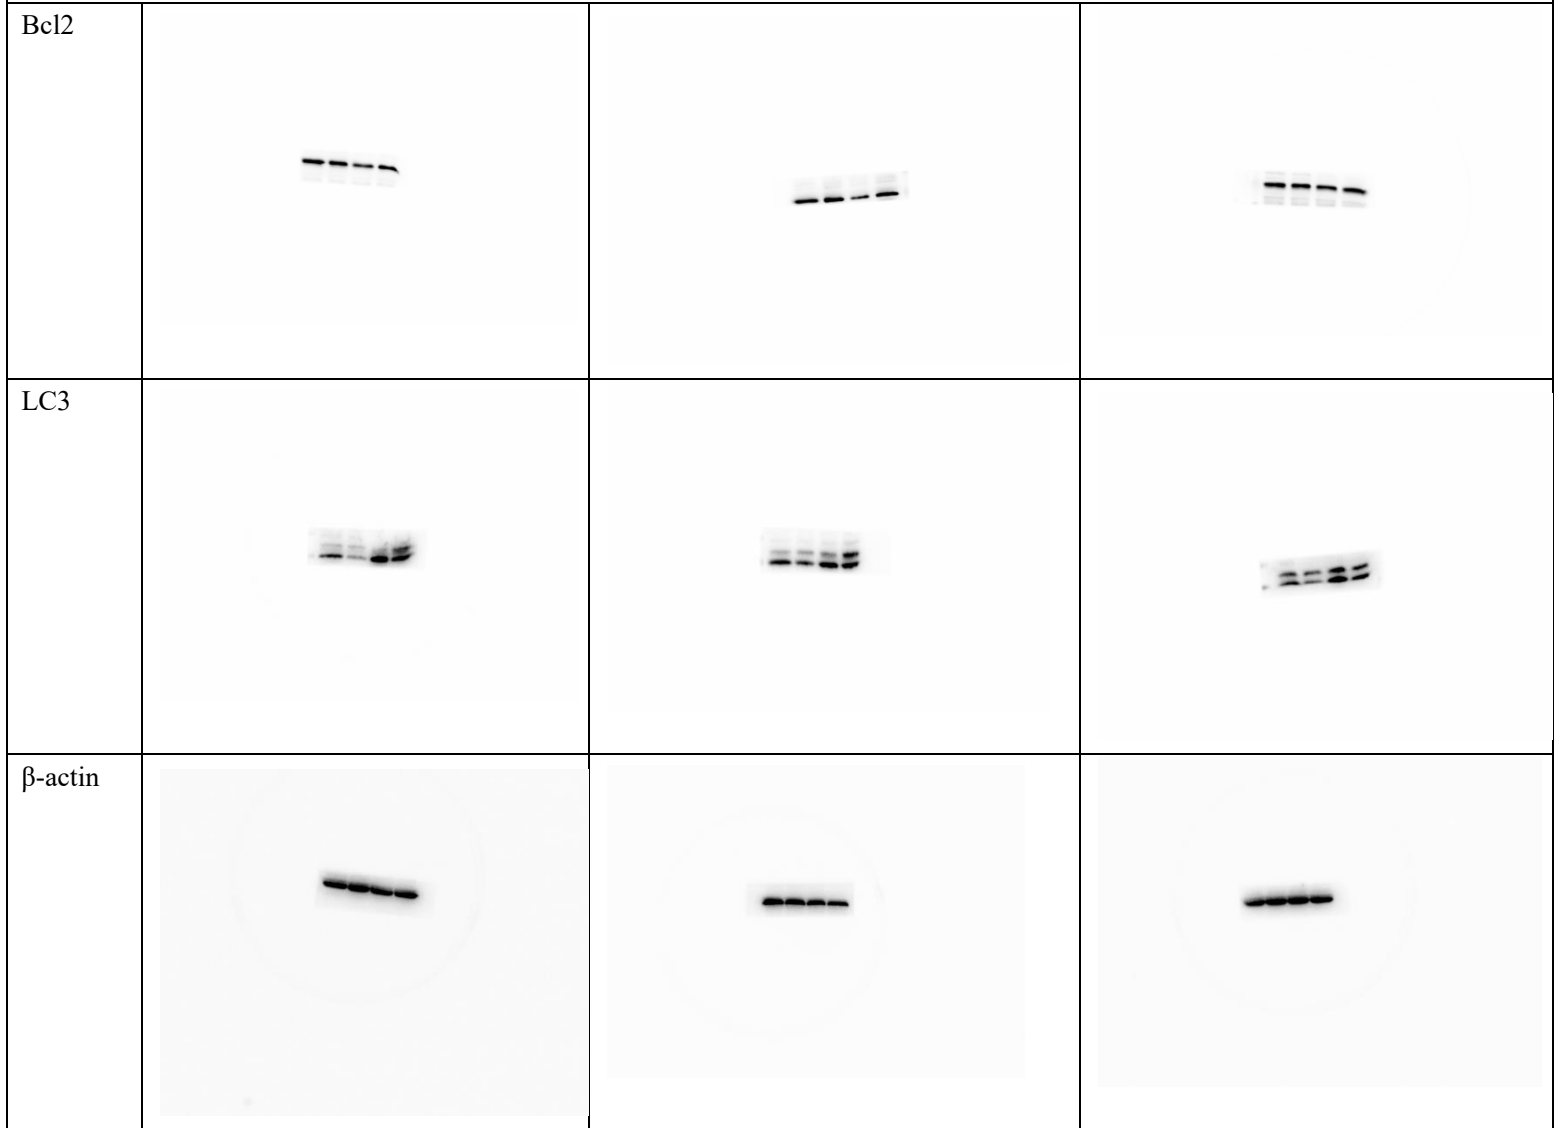

Figure 7D (H1299)

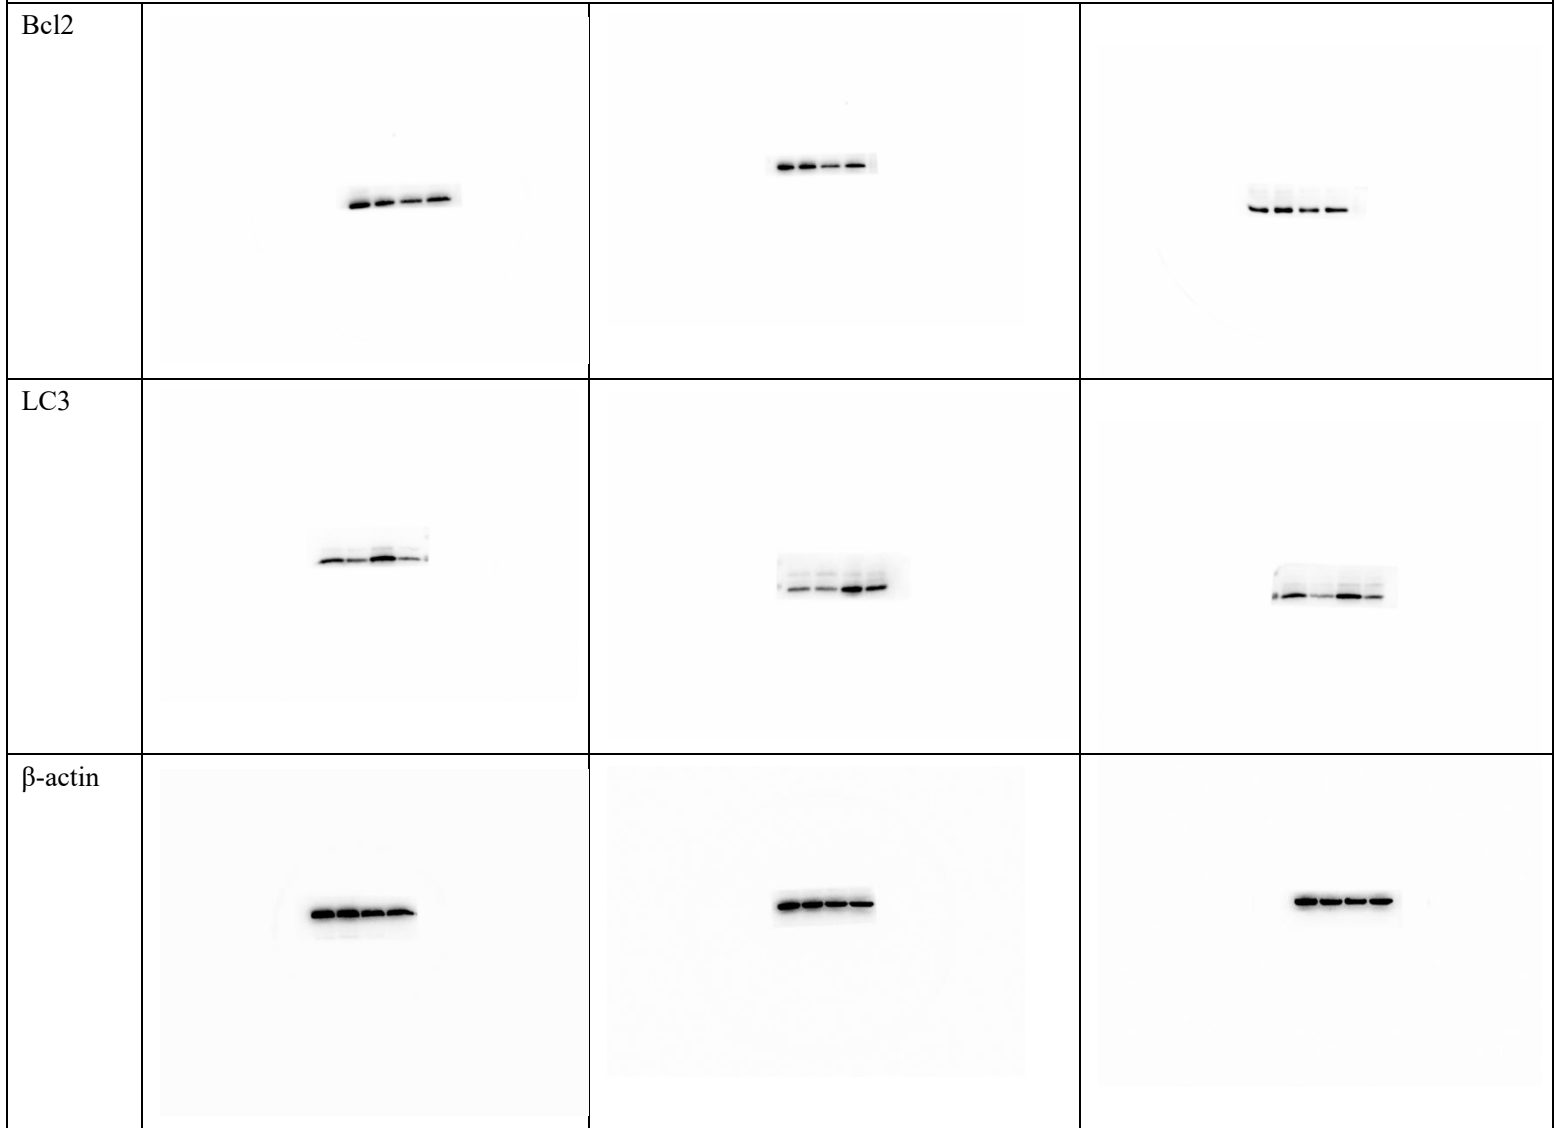

Figure 7D (H226)

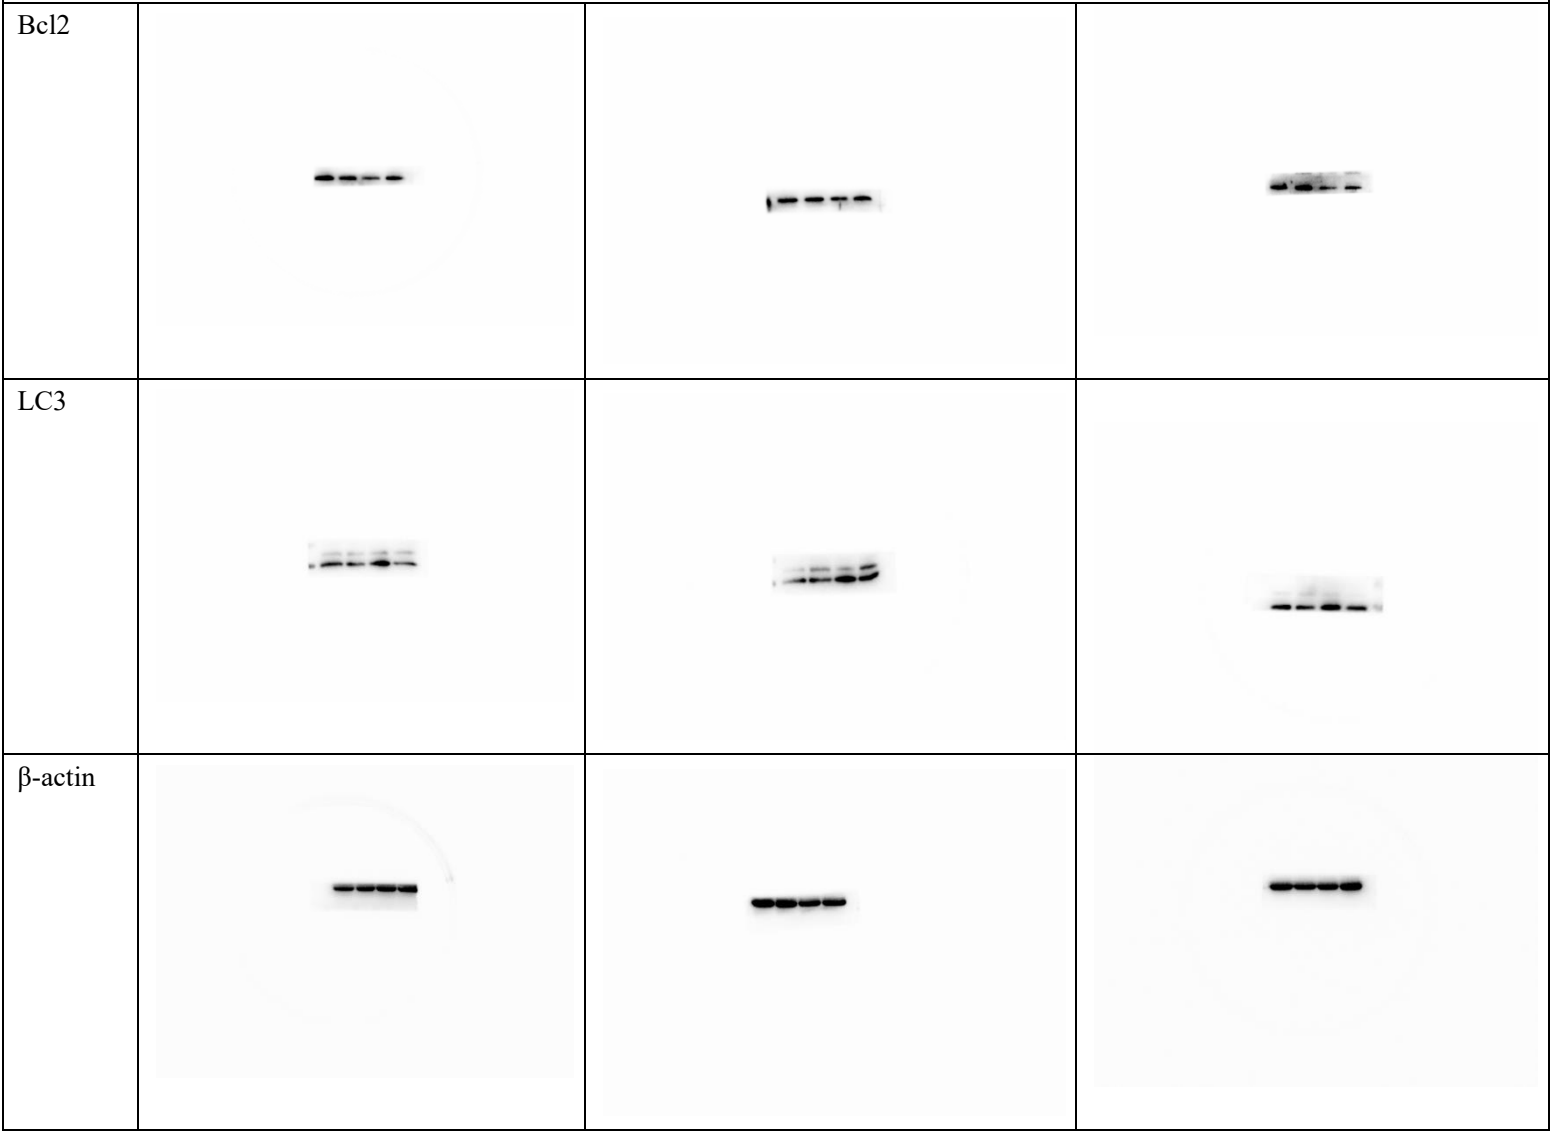



Figure 7F (A549)

|        |                                                                                     |                                                                                      |                                                                                       |
|--------|-------------------------------------------------------------------------------------|--------------------------------------------------------------------------------------|---------------------------------------------------------------------------------------|
| mTOR   |    |    |    |
| p-mTOR |   |   |   |
| PI3K   |  |  |  |
| p-PI3K |  |  |  |

|                |                                                                                     |                                                                                     |                                                                                       |
|----------------|-------------------------------------------------------------------------------------|-------------------------------------------------------------------------------------|---------------------------------------------------------------------------------------|
| AKT            |    |    |    |
| p-AKT          |    |    |    |
| $\beta$ -actin |  |  |  |

Figure 7F (H1299)

|        |                                                                                     |                                                                                      |                                                                                       |
|--------|-------------------------------------------------------------------------------------|--------------------------------------------------------------------------------------|---------------------------------------------------------------------------------------|
| mTOR   |    |    |    |
| p-mTOR |   |   |   |
| PI3K   |  |  |  |
| p-PI3K |  |  |  |

|         |                                                                                    |                                                                                     |                                                                                      |
|---------|------------------------------------------------------------------------------------|-------------------------------------------------------------------------------------|--------------------------------------------------------------------------------------|
| AKT     |   |   |   |
| p-AKT   |   |   |   |
| β-actin |  |  |  |

Figure 7F (H226)

|        |                                                                                     |                                                                                      |                                                                                       |
|--------|-------------------------------------------------------------------------------------|--------------------------------------------------------------------------------------|---------------------------------------------------------------------------------------|
| mTOR   |    |    |    |
| P-mTOR |   |   |   |
| PI3K   |  |  |  |
| p-PI3K |  |  |  |

|                |                                                                                    |                                                                                     |                                                                                      |
|----------------|------------------------------------------------------------------------------------|-------------------------------------------------------------------------------------|--------------------------------------------------------------------------------------|
| AKT            |   |   |   |
| p-AKT          |   |   |   |
| $\beta$ -actin |  |  |  |

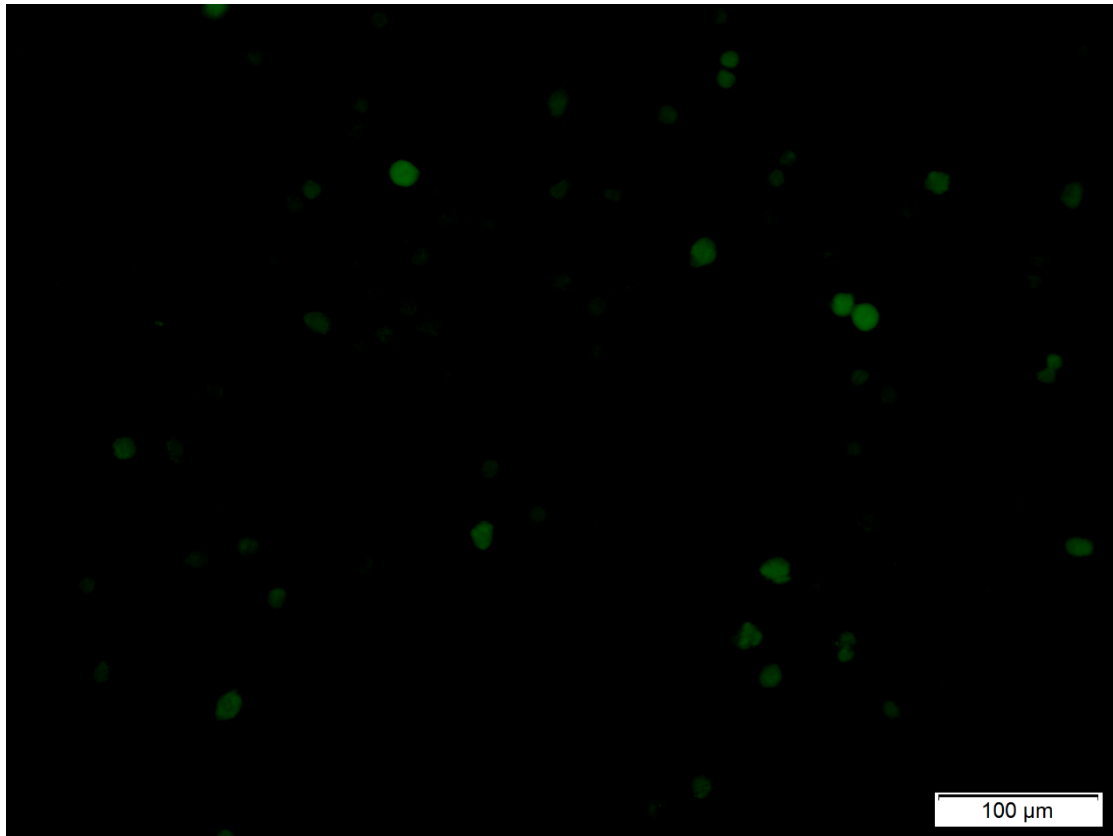

**Fig. 7A\_A549\_control**

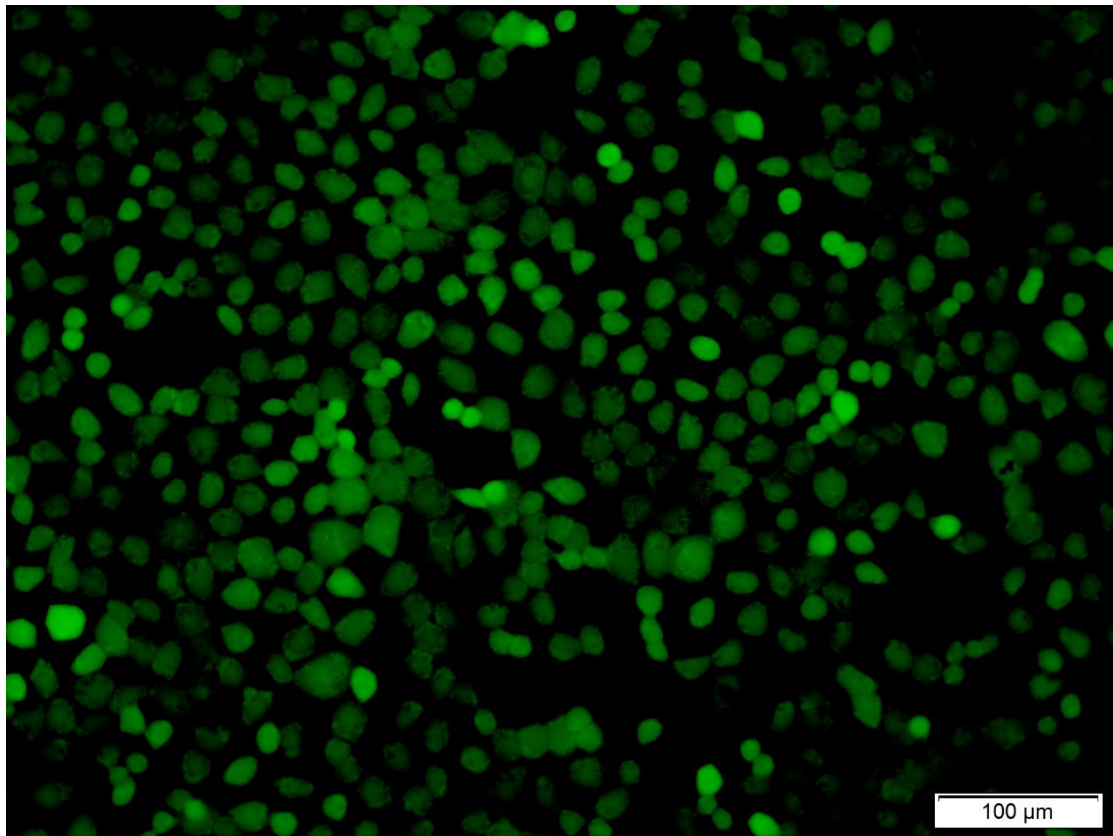

**Fig. 7A\_A549\_ABX\_10μM**

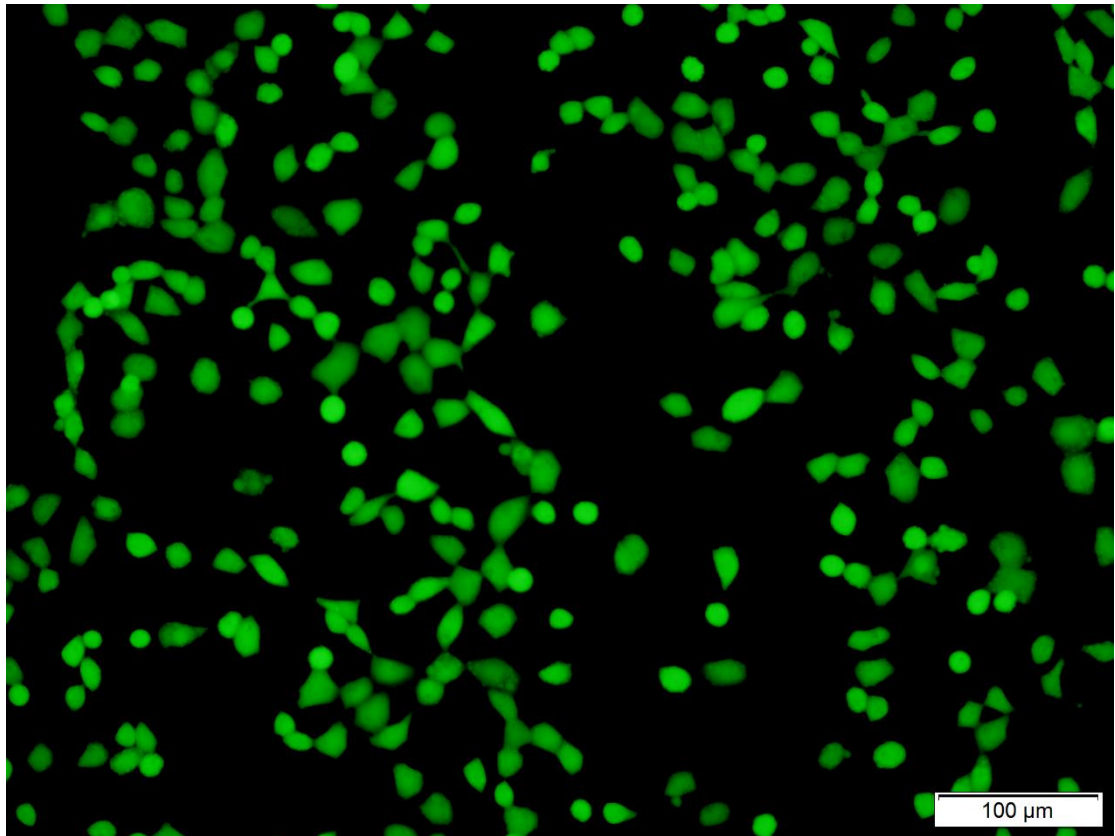

**Fig. 7A\_A549\_ABX\_20μM**

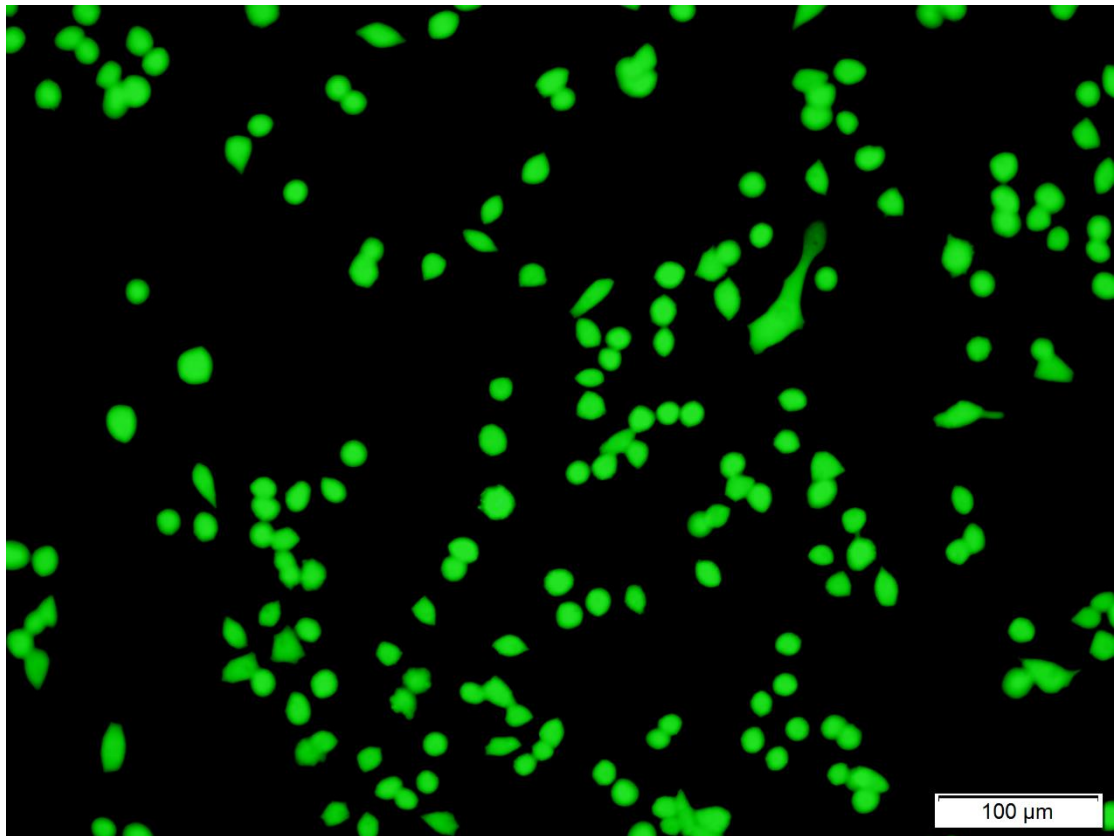

**Fig. 7A\_A549\_ABX\_40μM**



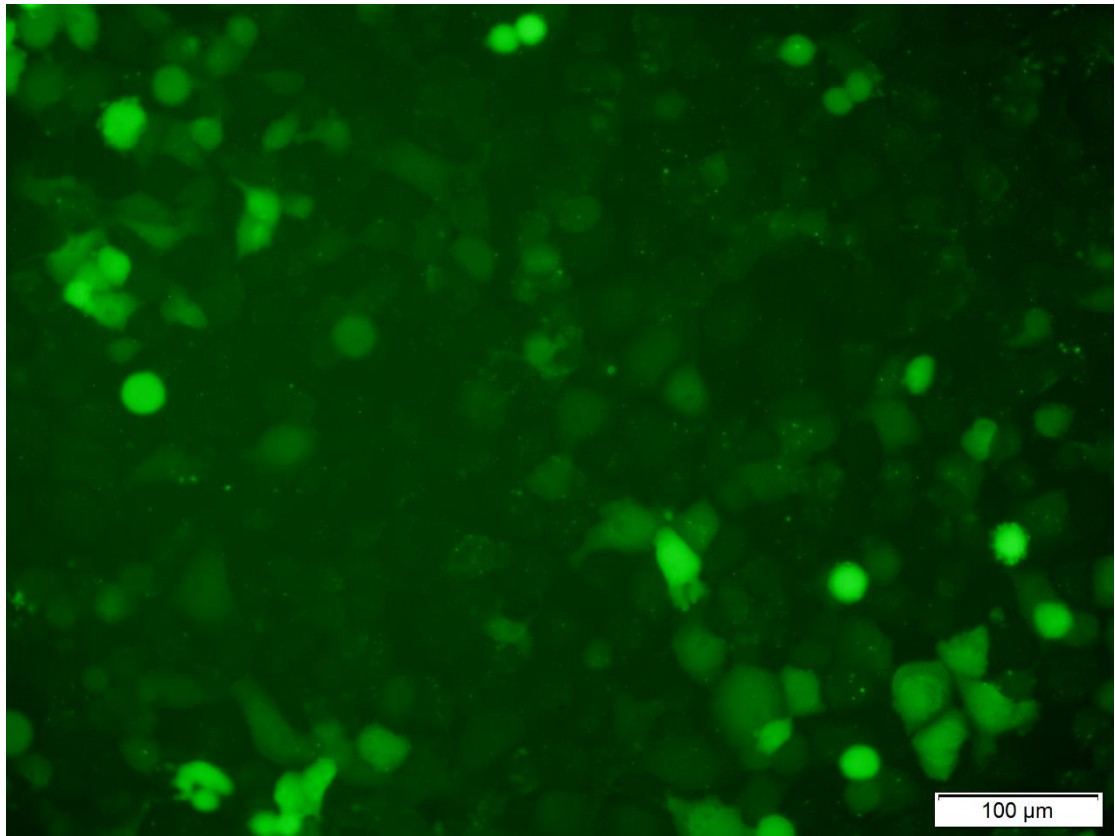

**Fig. 7A\_H1299\_control**

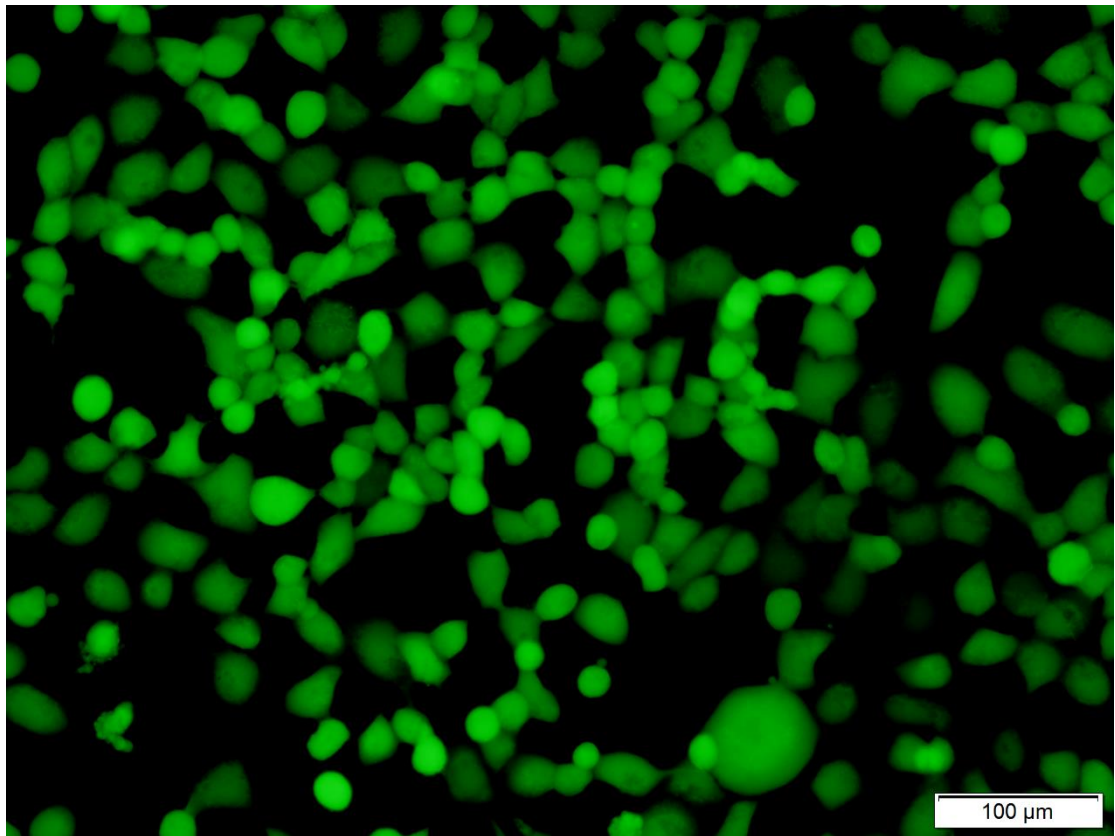

**Fig. 7A\_H1299\_ABX\_10μM**

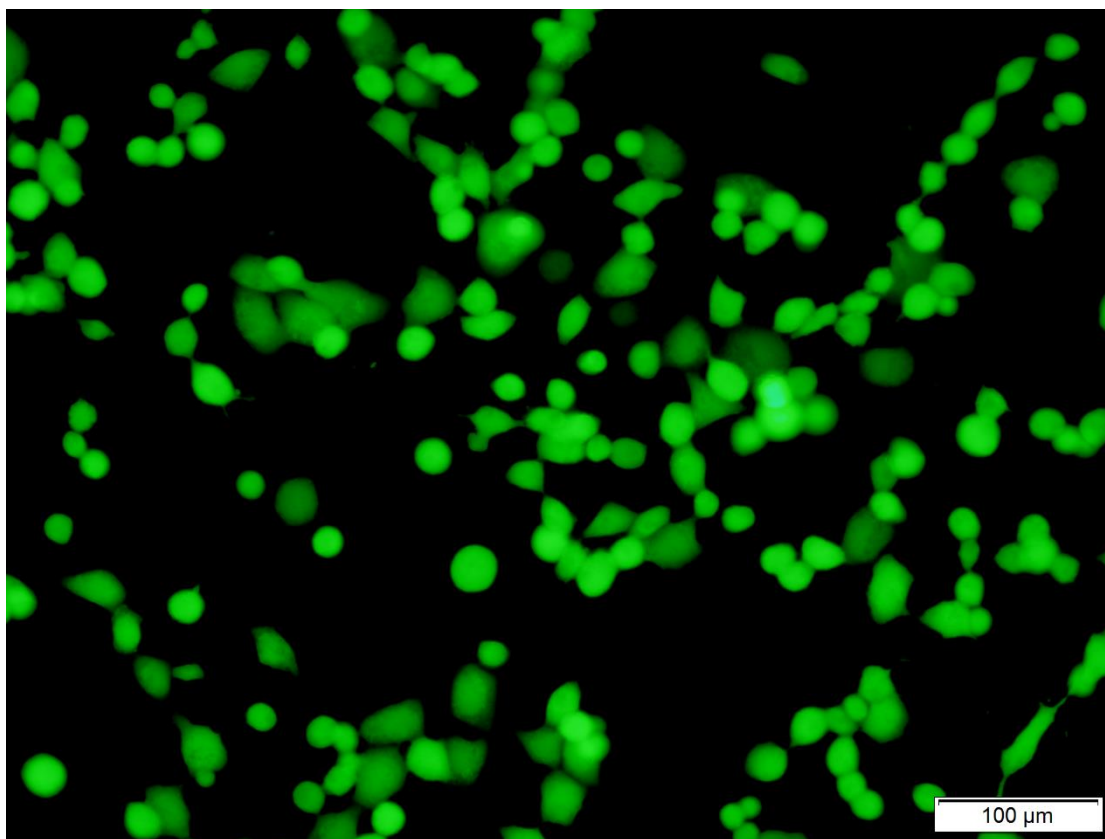

**Fig. 7A\_H1299\_ABX\_20μM**

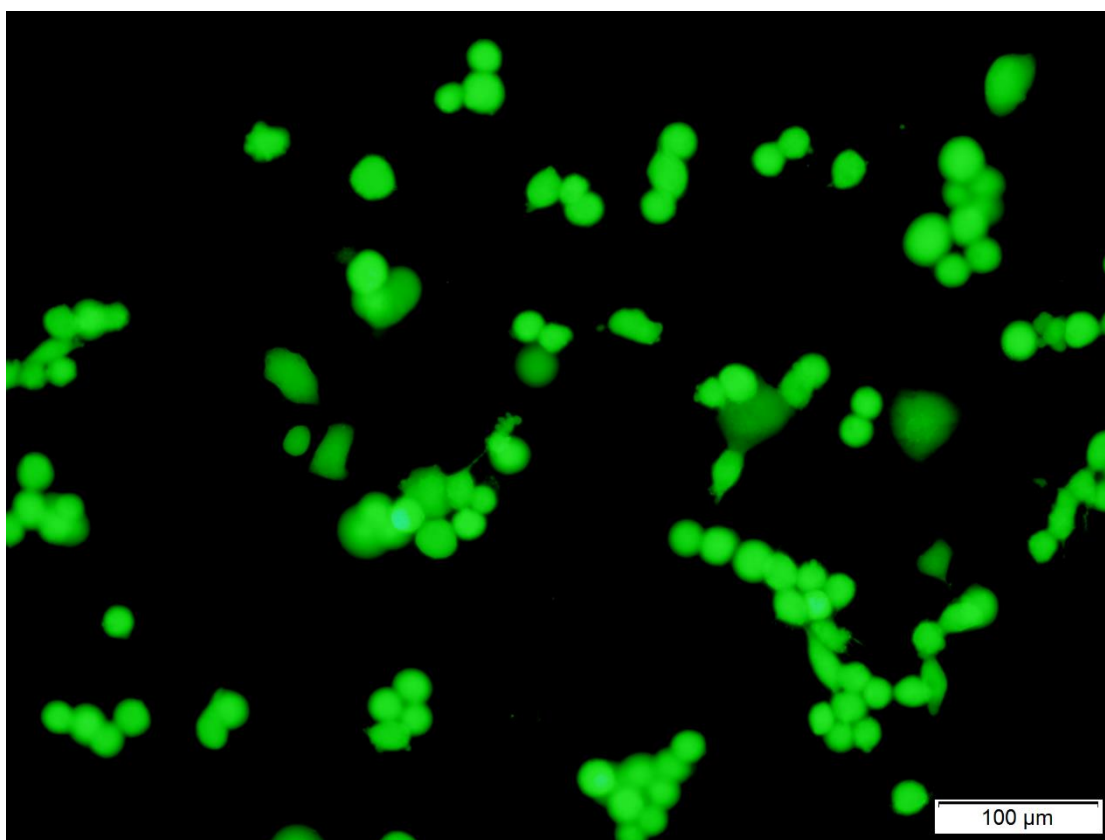

**Fig. 7A\_H1299\_ABX\_40μM**

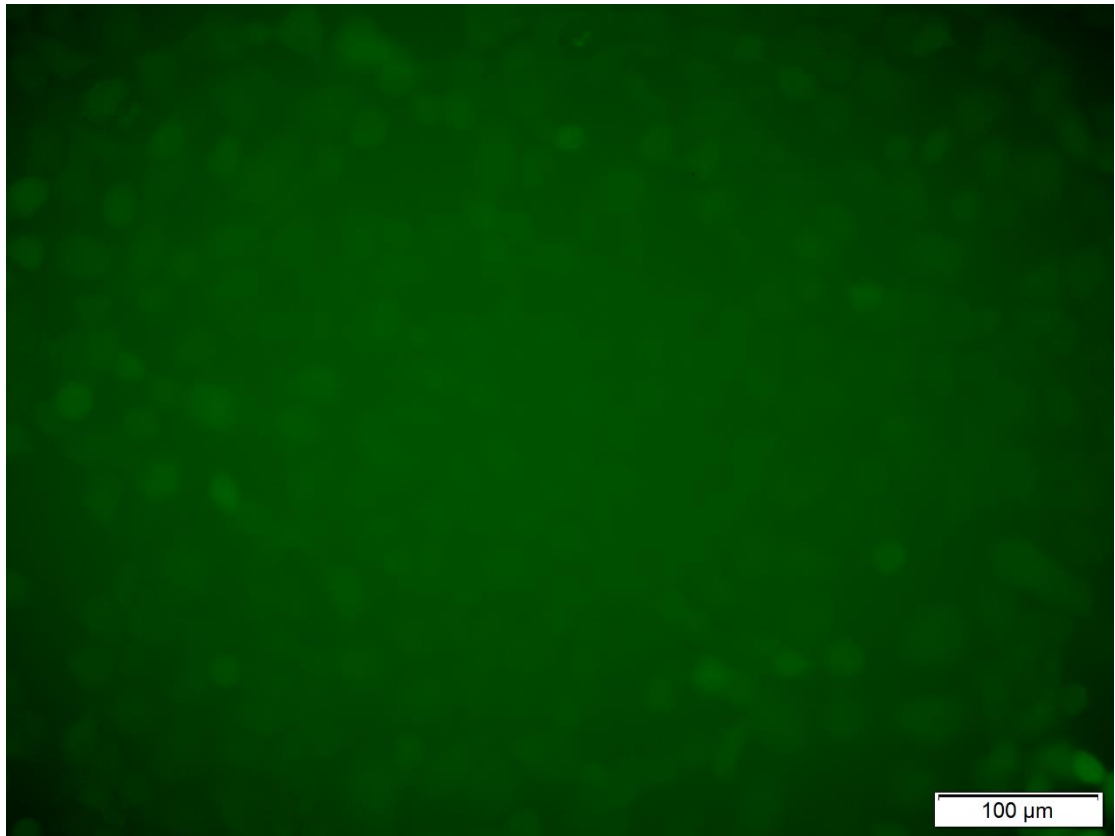

**Fig. 7A\_H226\_control**

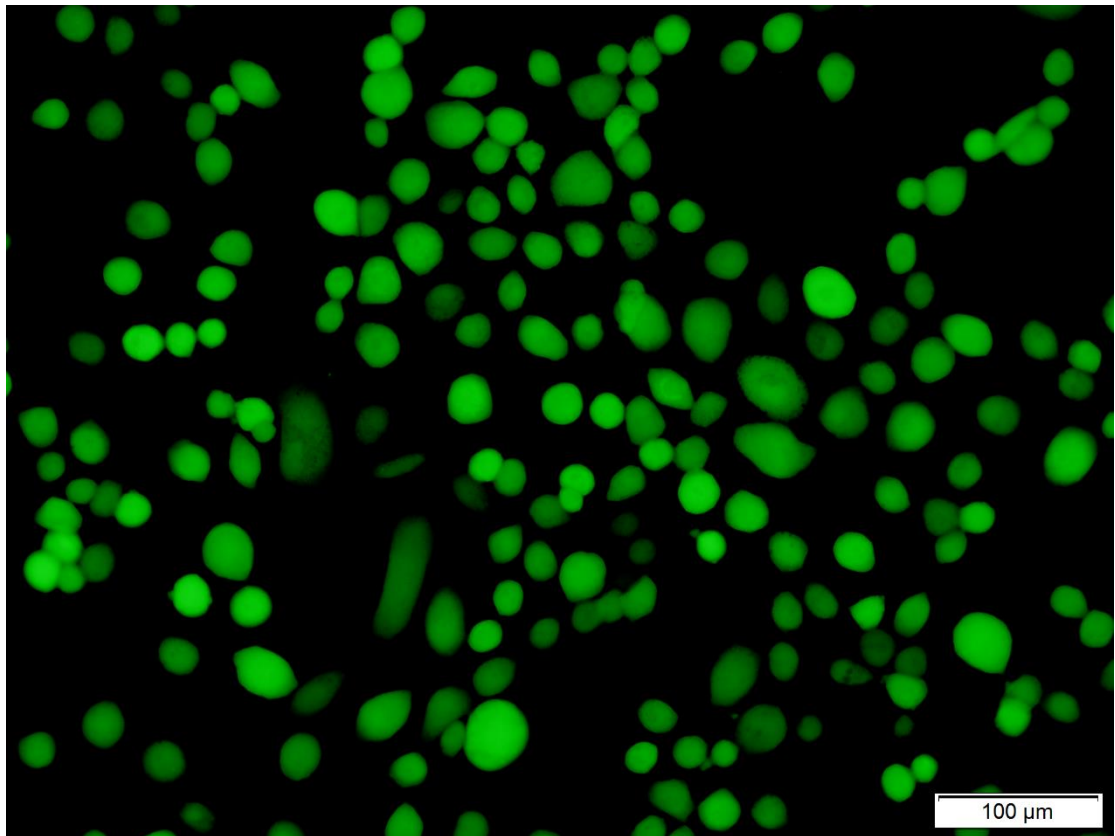

**Fig. 7A\_H226\_ABX\_10μM**

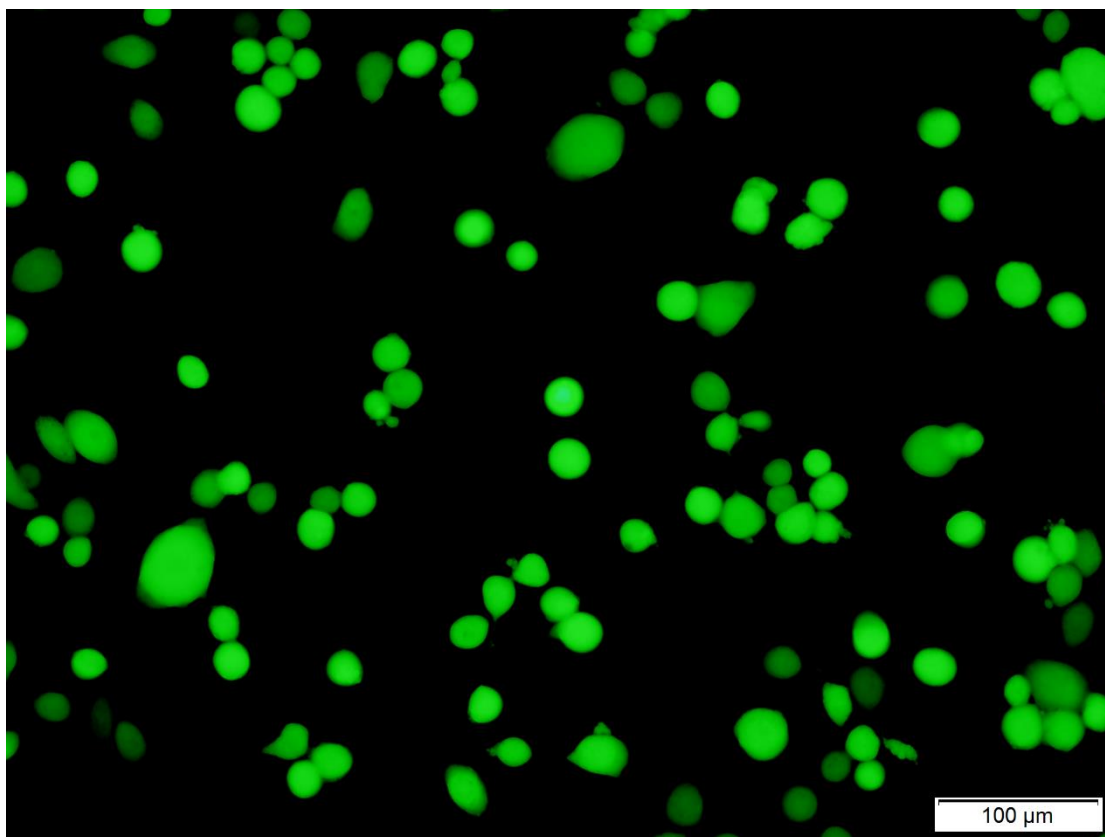

**Fig. 7A\_H226\_ABX\_20μM**

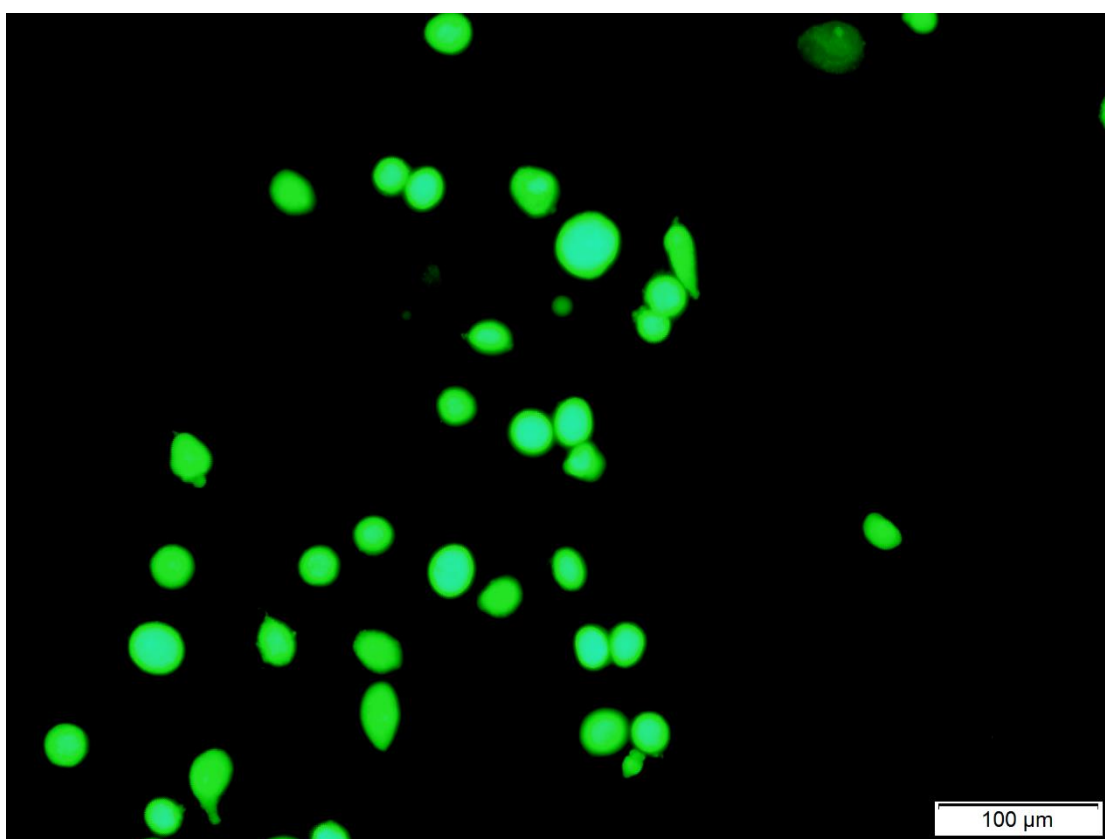

**Fig. 7A\_H226\_ABX\_40μM**

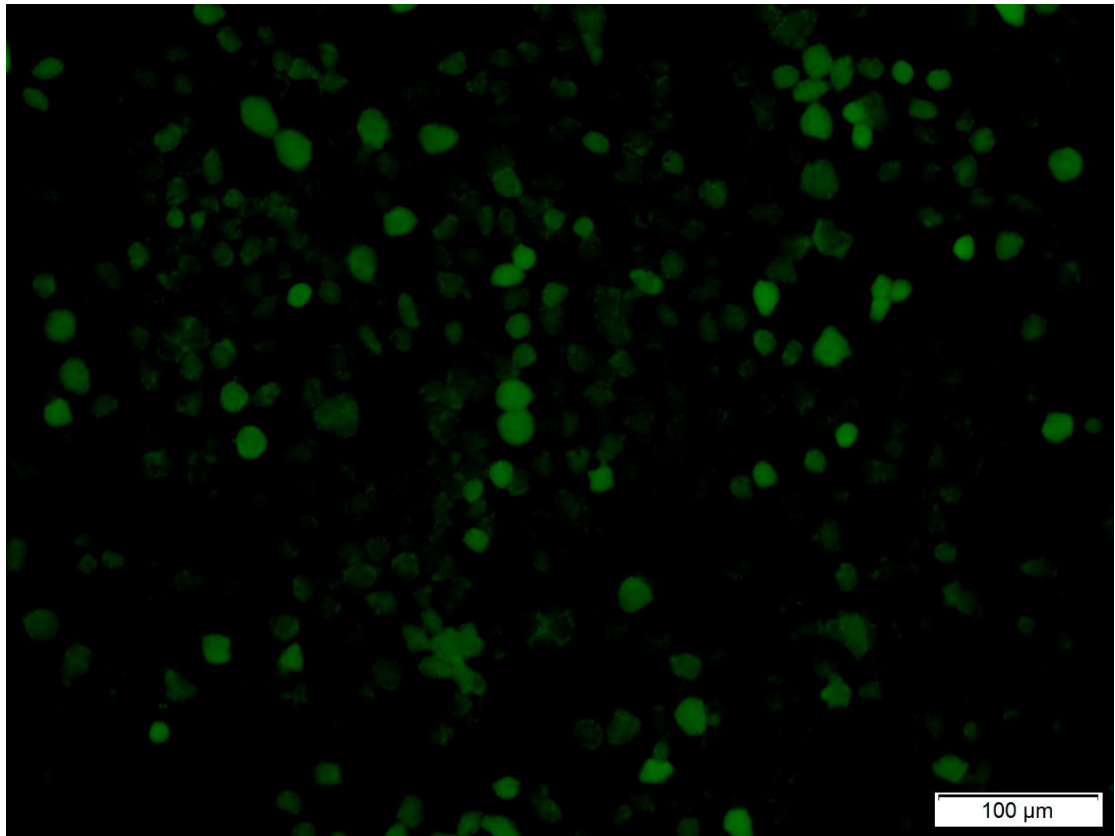

**Fig. 7B\_A549\_control**

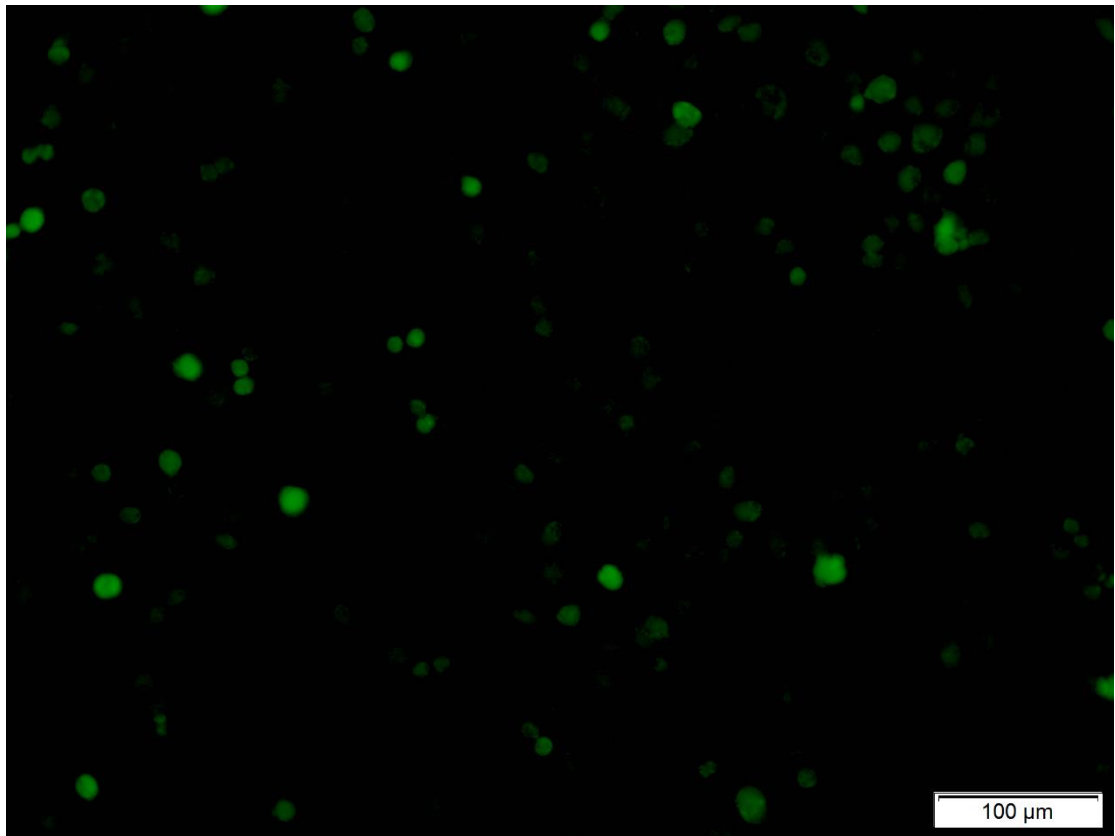

**Fig. 7B\_A549\_NAC\_10μM**



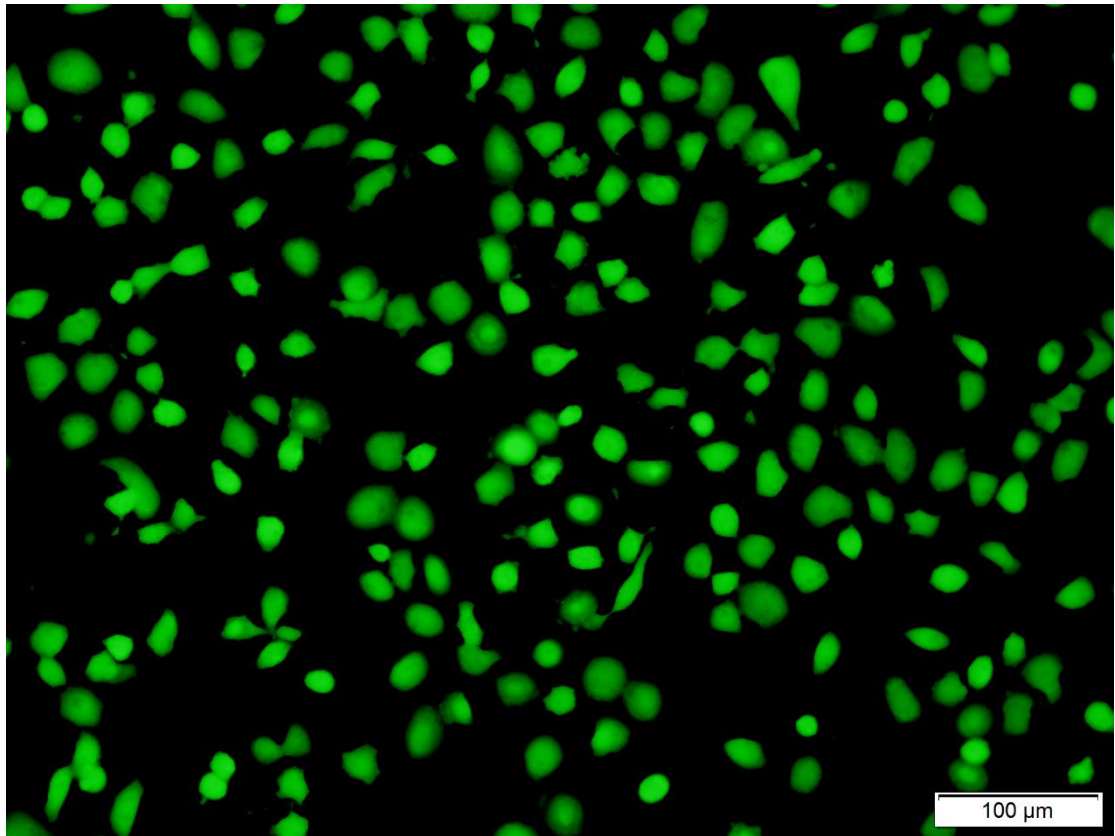

**Fig. 7B\_A549\_ABX\_20μM**

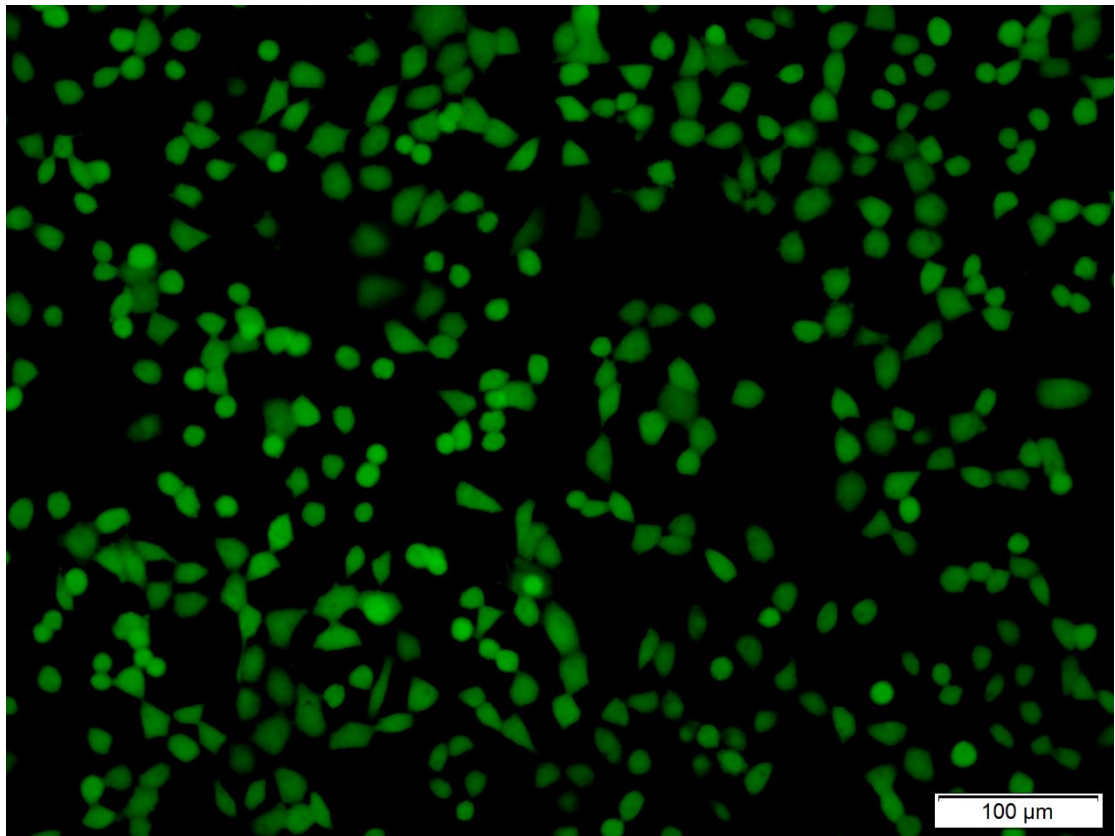

**Fig. 7B\_A549\_ABX+NAC**

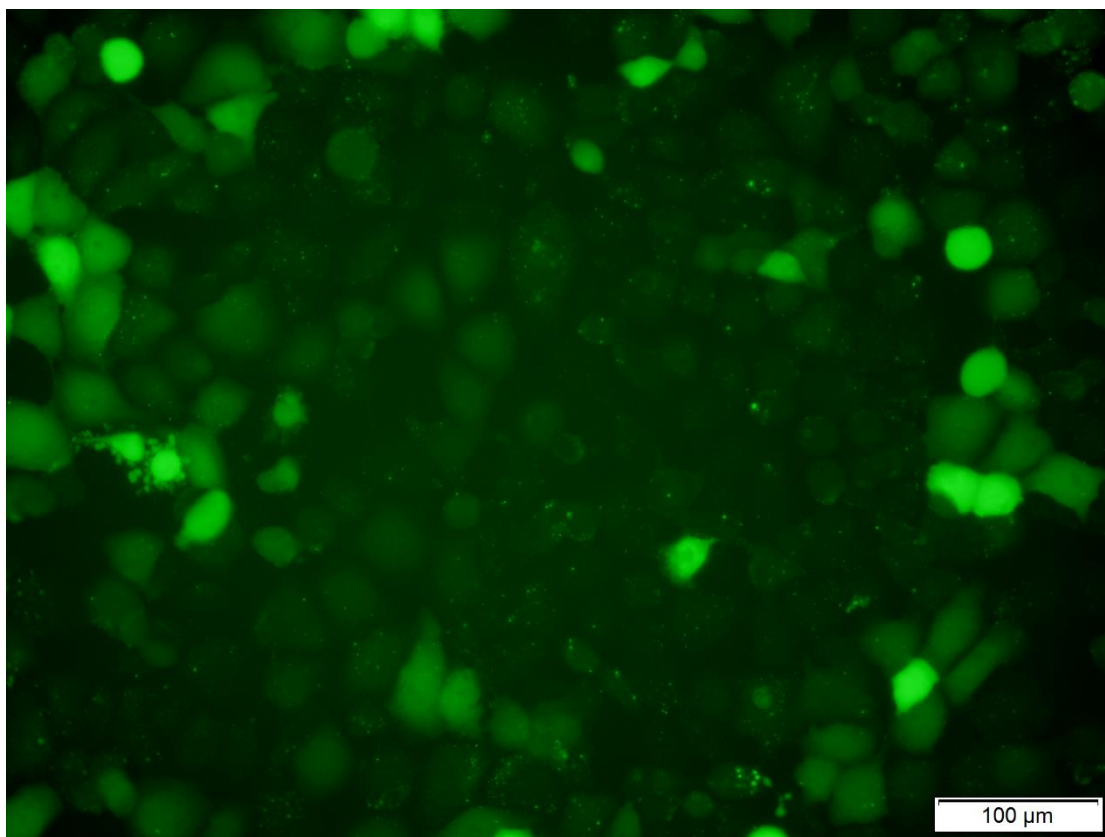

**Fig. 7B\_H1299\_control**

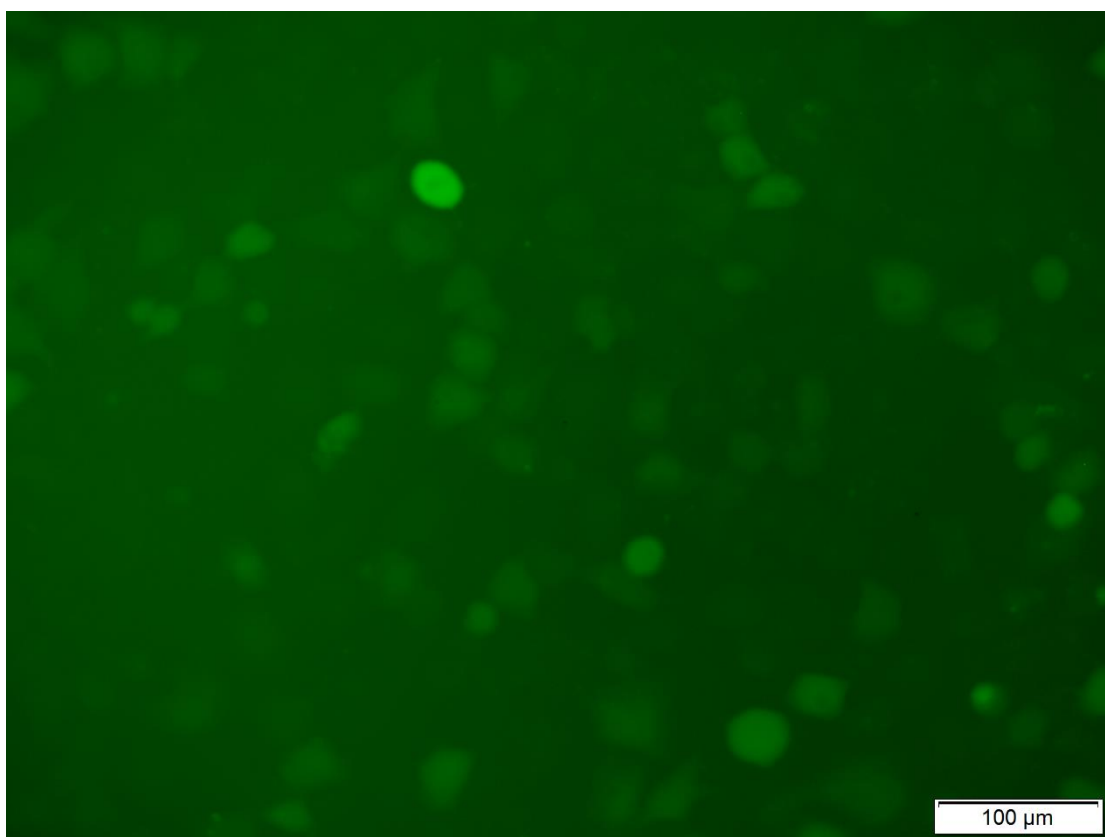

**Fig. 7B\_H1299\_NAC\_10μM**

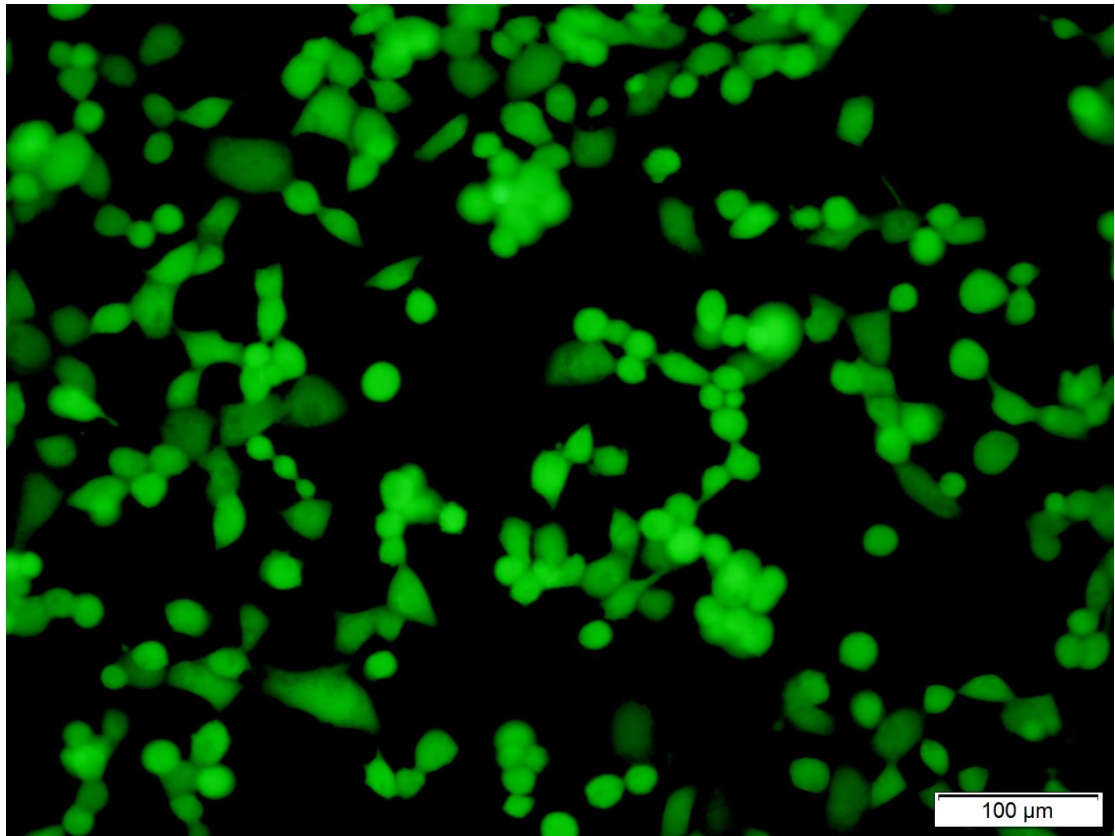

**Fig. 7B\_H1299\_ABX\_20μM**

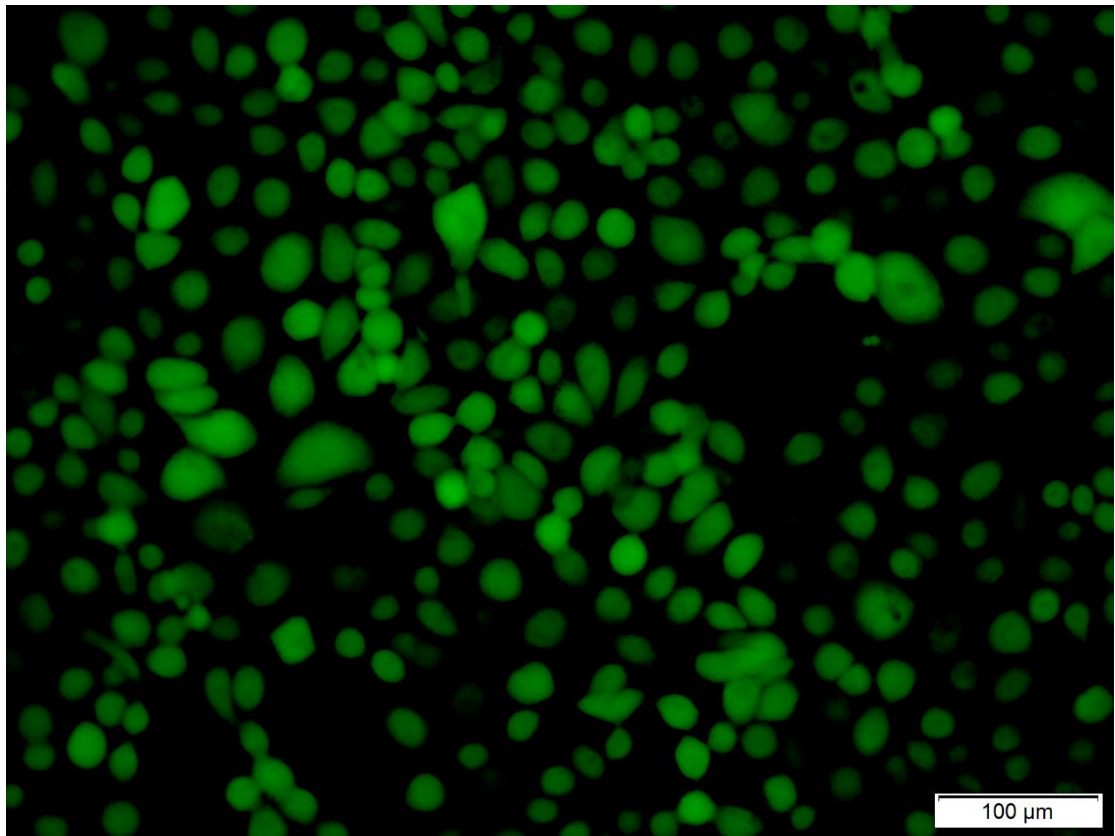

**Fig. 7B\_H1299\_ABX+NAC**



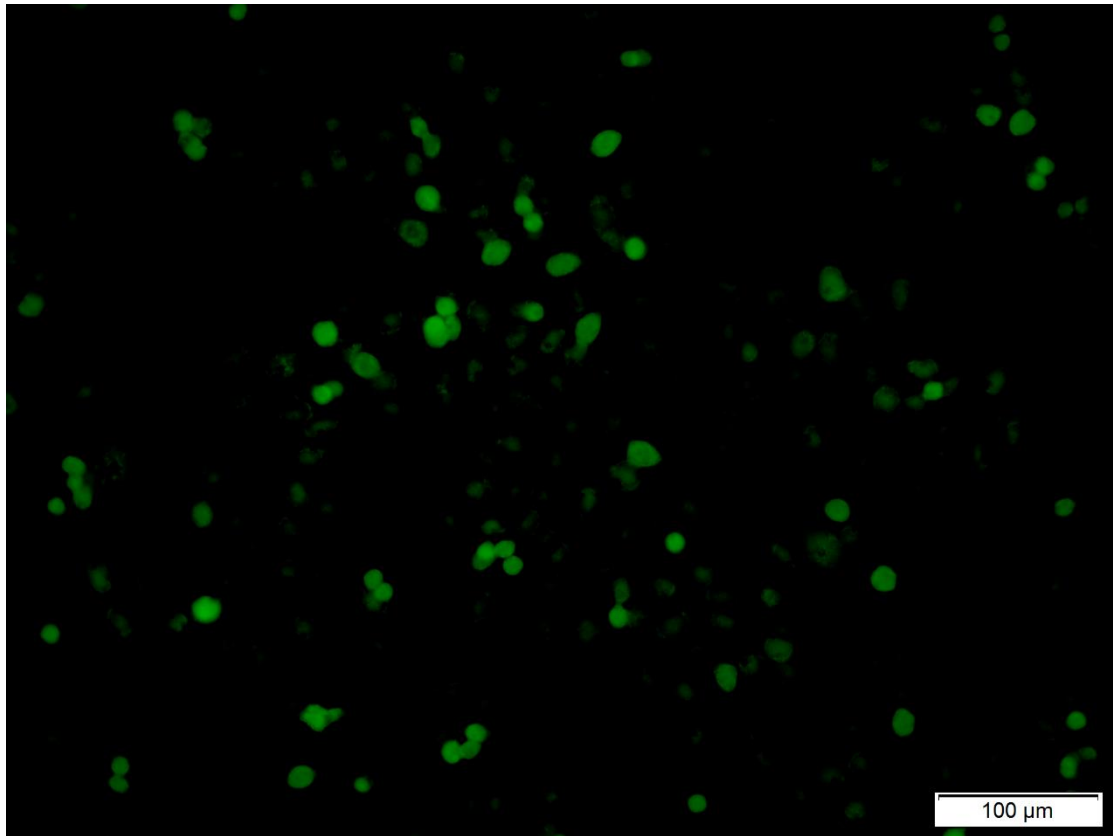

**Fig. 7B\_H226\_control**

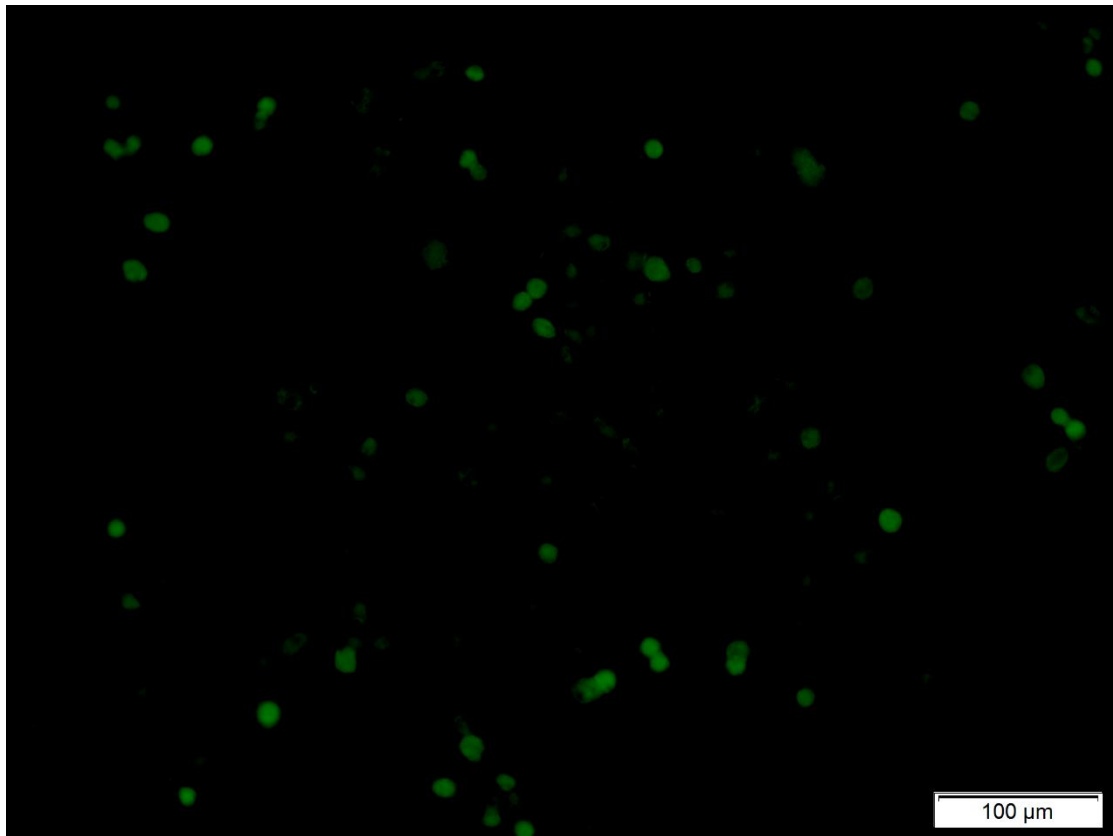

**Fig. 7B\_H226\_NAC\_10μM**

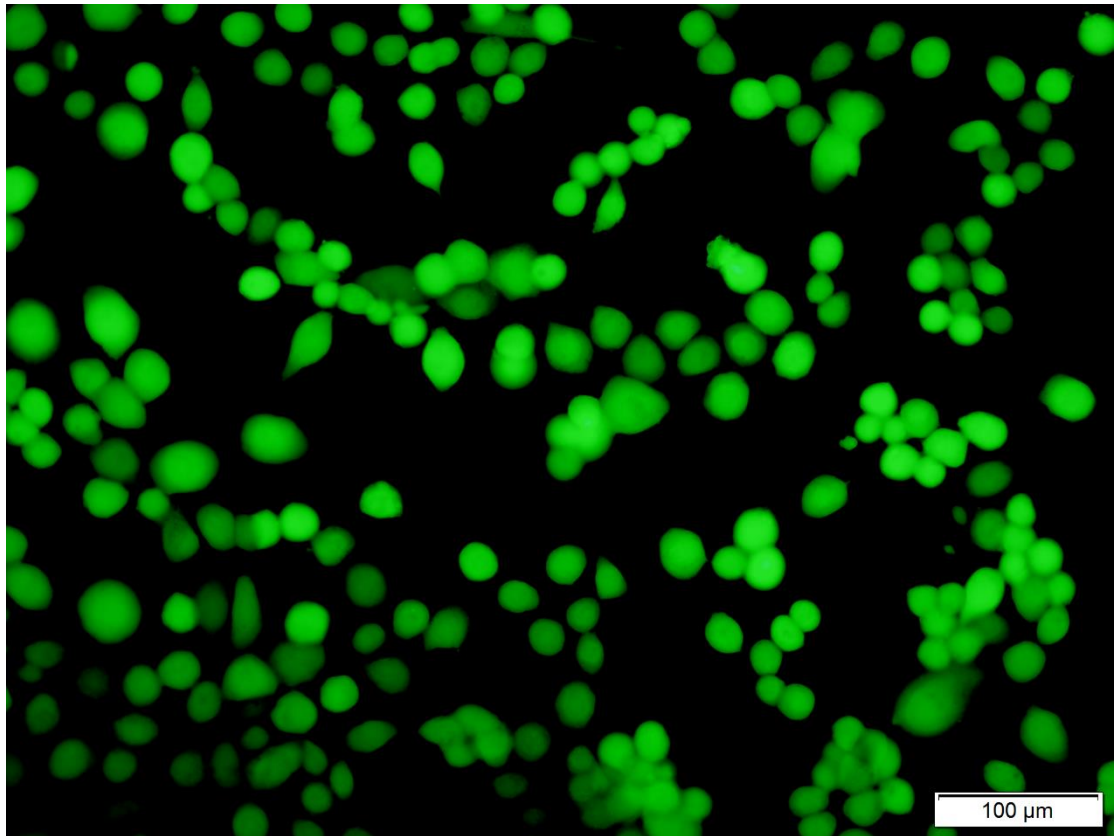

**Fig. 7B\_ H226\_ABX\_20μM**

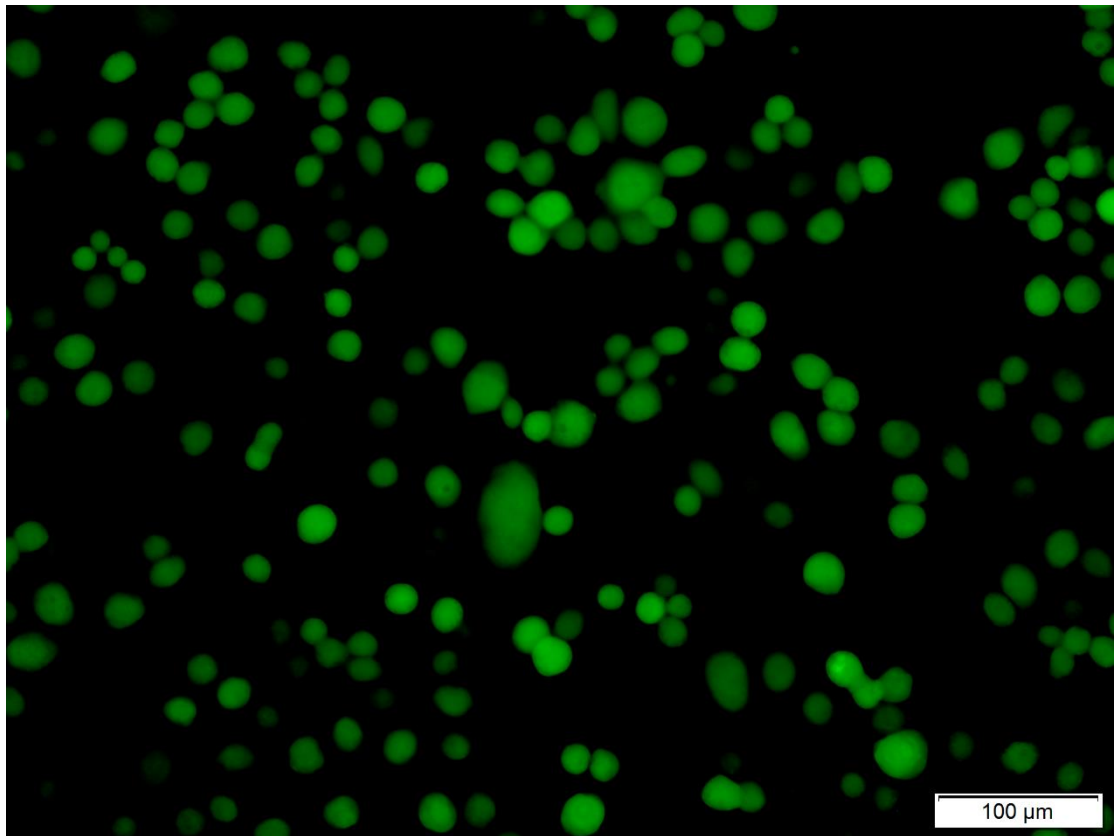

**Fig. 7B\_ H226\_ABX+NAC**
